# Supplementary material for: Emergency medical services and palliative care: a scoping review
Source: PubMed Central journal article supplement — BMJ Open. 2023 Mar 15;13(3):e071116. doi: 10.1136/bmjopen-2022-071116 (PMC10030966; doi:10.1136/bmjopen-2022-071116), 2023-03-15

# BMJ Open

BMJ Open is committed to open peer review. As part of this commitment we make the peer review history of every article we publish publicly available.

When an article is published we post the peer reviewers' comments and the authors' responses online. We also post the versions of the paper that were used during peer review. These are the versions that the peer review comments apply to.

The versions of the paper that follow are the versions that were submitted during the peer review process. They are not the versions of record or the final published versions. They should not be cited or distributed as the published version of this manuscript.

BMJ Open is an open access journal and the full, final, typeset and author-corrected version of record of the manuscript is available on our site with no access controls, subscription charges or pay-per-view fees (<http://bmjopen.bmj.com>).

If you have any questions on BMJ Open's open peer review process please email [info.bmjopen@bmj.com](mailto:info.bmjopen@bmj.com)

# BMJ Open

## Emergency Medical Services and Palliative Care: A Scoping Review

|                               |                                                                                                                                                                                                                                                                                                                                                                                                                       |
|-------------------------------|-----------------------------------------------------------------------------------------------------------------------------------------------------------------------------------------------------------------------------------------------------------------------------------------------------------------------------------------------------------------------------------------------------------------------|
| Journal:                      | <i>BMJ Open</i>                                                                                                                                                                                                                                                                                                                                                                                                       |
| Manuscript ID                 | bmjopen-2022-071116                                                                                                                                                                                                                                                                                                                                                                                                   |
| Article Type:                 | Original research                                                                                                                                                                                                                                                                                                                                                                                                     |
| Date Submitted by the Author: | 16-Dec-2022                                                                                                                                                                                                                                                                                                                                                                                                           |
| Complete List of Authors:     | Gage, Caleb; University of Cape Town Faculty of Health Sciences, Division of Emergency Medicine<br>Stander, Charnelle; University of Cape Town Faculty of Health Sciences, Division of Emergency Medicine<br>Gwyther, Liz; University of Cape Town Faculty of Health Sciences, Division of Interdisciplinary Palliative Care and Medicine<br>Stassen, Willem; University of Cape Town, Division of Emergency Medicine |
| Keywords:                     | ACCIDENT & EMERGENCY MEDICINE, HEALTH SERVICES ADMINISTRATION & MANAGEMENT, PALLIATIVE CARE                                                                                                                                                                                                                                                                                                                           |
|                               |                                                                                                                                                                                                                                                                                                                                                                                                                       |

SCHOLARONE™  
Manuscripts

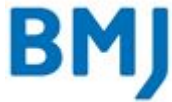

I, the Submitting Author has the right to grant and does grant on behalf of all authors of the Work (as defined in the below author licence), an exclusive licence and/or a non-exclusive licence for contributions from authors who are: i) UK Crown employees; ii) where BMJ has agreed a CC-BY licence shall apply, and/or iii) in accordance with the terms applicable for US Federal Government officers or employees acting as part of their official duties; on a worldwide, perpetual, irrevocable, royalty-free basis to BMJ Publishing Group Ltd ("BMJ") its licensees and where the relevant Journal is co-owned by BMJ to the co-owners of the Journal, to publish the Work in this journal and any other BMJ products and to exploit all rights, as set out in our [licence](#).

The Submitting Author accepts and understands that any supply made under these terms is made by BMJ to the Submitting Author unless you are acting as an employee on behalf of your employer or a postgraduate student of an affiliated institution which is paying any applicable article publishing charge ("APC") for Open Access articles. Where the Submitting Author wishes to make the Work available on an Open Access basis (and intends to pay the relevant APC), the terms of reuse of such Open Access shall be governed by a Creative Commons licence – details of these licences and which [Creative Commons](#) licence will apply to this Work are set out in our licence referred to above.

Other than as permitted in any relevant BMJ Author's Self Archiving Policies, I confirm this Work has not been accepted for publication elsewhere, is not being considered for publication elsewhere and does not duplicate material already published. I confirm all authors consent to publication of this Work and authorise the granting of this licence.

# Emergency Medical Services and Palliative Care: A Scoping Review

**Authors:** Caleb Hanson Gage<sup>a</sup>, Charnelle Stander<sup>a</sup>, Liz Gwyther<sup>b</sup>, Willem Stassen<sup>a</sup>

<sup>a</sup> Division of Emergency Medicine, University of Cape Town, Cape Town, South Africa.

<sup>b</sup> Division of Interdisciplinary Palliative Care and Medicine, University of Cape Town, Cape Town, South Africa.

**Corresponding Author:** Caleb Hanson Gage. Division of Emergency Medicine, University of Cape Town, Cape Town 7935, South Africa. +27 83 799 4357, caleb.gage@gmail.com

**Word Count:** 3 837

peer review only

## ABSTRACT

**Introduction:** While Emergency Medical Services (EMS) and palliative care function with unique respective aims, they often intersect. A growing body of literature recommends integration between the two fields to improve palliative care provision.

**Objectives:** The aim of this study was to map existing EMS and palliative care literature by identifying study types, extracting key findings, and noting limitations, providing a broad summary of current evidence and context for EMS and palliative care integration while highlighting knowledge gaps for future research.

**Methods and Analysis:** A scoping review of literature was performed with an *a priori* search strategy. The following databases were searched for empirical, English studies published between 2000 and 2022 involving EMS and palliative care: MEDLINE via Pubmed, Web of Science, CINAHL, Embase via Scopus, PsycINFO, the University of Cape Town Thesis Repository and Google Scholar. Two reviewers screened titles, abstracts and full texts for inclusion. Extracted data underwent descriptive content analysis.

**Results:** In total, 10 725 articles were identified. Following title and abstract screening, 10 634 studies were excluded. A further 35 studies were excluded upon full text screening. The remaining 56 articles were included for review. Four predominant domains arose from included studies: 1) EMS' palliative care role, 2) Challenges faced by EMS in palliative situations, 3) EMS and palliative care integration benefits, 4) Proposed recommendations for EMS and palliative care integration.

**Conclusion:** EMS have a role to play in out-of-hospital palliative care, however, many challenges must be overcome. EMS provider education, collaboration between EMS and palliative systems, creation of EMS palliative care guidelines/protocols, creation of specialised out-of-hospital palliative care teams and further research have been recommended as solutions. Future research should focus on the prioritization, implementation, and effectiveness of these solutions, particularly in low-to-middle income countries where the need, and potential impact, are most significant.

**Key Words:** Emergency Medical Services, Palliative Care

## ARTICLE SUMMARY

### Strengths and Limitations of This Study

- A thorough search string was piloted and employed in conjunction with a wide range of databases, meeting recommendations for optimal combinations, and providing a comprehensive view of contemporary literature.
- The performance and report of this review was completed according to the quality standards of the PRISMA-ScR guidelines.
- Limitations to this review include those common to scoping reviews such as human error in article selection.
- A formal risk of bias assessment was not performed; therefore, data reliability lacks evaluation.

## INTRODUCTION

Emergency Medical Services (EMS) and palliative care function with unique respective aims. While EMS are designed to preserve life and limb in emergency situations by immediate intervention and hospital conveyance(1,2), palliative care is focussed on prevention and relief of suffering associated with life-limiting illness.(3) The EMS approach is curative, while the palliative approach is supportive.

Despite these differences, EMS and palliative care often intersect.(4–7) As they progress towards end-of-life (EoL), patients with palliative needs experience worsening symptoms for which EMS are often contacted.(8,9) Furthermore, the role of EMS has expanded in recent years to include additional areas of healthcare such as community-based primary care and palliative care.(10) Global ageing populations and subsequent increases in chronic non-communicable diseases are well documented reasons for this expanded role as demand for palliative care rises and EMS are more frequently confronted with these patients.(11)

Contemporary EMS and palliative care literature recommends integration between the two fields to improve palliative care provision as the two systems may complement one another.(12) Nevertheless, a lack of integration persists, often resulting in poor management of patients with palliative needs by EMS.(12–14) Potential integration benefits include early palliative care delivery, provision of homecare, respect for patient autonomy, improved patient and family satisfaction, confidence, and quality of life (QoL), decreased health care costs and setting correct trajectories of care.(5,15,16)

Given the growing body of EMS and palliative care literature, and potential integration benefits, a need exists to review current evidence. Previous reviews have focussed on singular aspects such as EMS provision of palliative care in community-based settings(11), however, a more extensive review is lacking. This scoping review, therefore, maps existing EMS and palliative care literature by identifying study types, extracting key findings, and noting limitations, providing a broad summary of current evidence and context for EMS and palliative care integration while highlighting knowledge gaps for future research.

## METHODS

### *Design*

A scoping review of EMS and palliative care literature was performed, the protocol for which has been published previously,(17) detailing the methodological framework of Arksey and O'Malley used for this review.(18)

### *Search strategy and eligibility criteria*

An *a priori* search strategy, developed in line with the recommendations of Aromataris and Riitano, was used.(19) This strategy employed key word combinations and their synonyms (See Supplementary Material 1). The following databases were originally searched on 28 September 2021 with an updated search on 24 November 2022: MEDLINE via Pubmed, Web of Science, CINAHL, Embase via Scopus and PsycINFO. The University of Cape Town (UCT) Thesis Repository and Google Scholar were searched to identify relevant grey literature. These databases met the recommendation of Bramer, et al. for optimal database combinations.(20) Furthermore, Embase, CINAHL and PsycINFO provided access to unique palliative care literature not indexed in MEDLINE as highlighted by Tieman, et al.(21) Additional relevant articles were sought from hand-searching reference lists of eligible studies. This search strategy was piloted to ensure appropriateness of key word combinations in the selected databases.

Eligible studies were selected based on the following criteria:

- Inclusion: Empirical, English studies involving human populations published between 1 January 2000 and 24 November 2022 concerning EMS and palliative care including relevant grey literature. The EMS and palliative care interface was the primary focus for eligibility.
- Exclusion: Studies involving the in-hospital setting, including emergency departments (EDs), those where the full text was unobtainable, editorial and discussion articles, opinion papers and studies involving exclusively EMS or palliative care.



### *Data Management*

All identified studies were uploaded to Mendeley reference software(22) and duplicates removed. Remaining studies were exported to the Rayyan web application(23) where two authors (CG, CS) independently screened titles and abstracts for inclusion. CG and CS then screened the full texts of included studies for final inclusion in the review. Agreement achieved between authors was >99%. Upon discussion, complete agreement was reached for all studies. This process was overseen by LG and WS. All authors agreed upon the final inclusion list.

### *Data Extraction and Analysis*

An *a priori* data extraction matrix was used to gather the following data from each included study which were charted by CG using *Microsoft Word* (Microsoft Corporation, Redmond, Washington, U.S.A.): Title, authorship, publication year, setting, aims, population and sample, EMS palliative care training, methodology, conclusions, significant findings, limitations. To ensure consistency in application of this extraction matrix, CS double coded 10% of included articles. Extracted data underwent descriptive content analysis where major domains were identified through an inductive-dominant approach. Findings are presented in accordance with the Preferred Reporting Items for Systematic Reviews and Meta-Analyses extension for scoping reviews (PRISMA-ScR).(24,25)

### *Patient and Public Involvement*

No patients were involved in this study.

## **RESULTS**

After duplication removal, 10 725 studies were identified. Following title and abstract screening, 10 634 studies were excluded. A further 35 studies were excluded upon full text screening. Of the full text exclusions, 12 full texts were unavailable, the EMS and palliative care interface was not the primary focus in 11 studies, 8 studies presented non-empirical evidence and the remaining 4 studies were previously

1  
2  
3 undetected duplicates. Hand-searching of included reference lists revealed no  
4 further studies. In total, 56 studies were included for analysis. Figure 1 details the  
5 selection process while a summary of included studies is provided in Supplementary  
6  
7 Material 2.  
8  
9

### 10 *Study characteristics*

11  
12  
13 Included studies were performed in the United States of America (USA)  
14 (n=16),(1,6,26–39) the United Kingdom (UK) (n=9),(7,14,40–46) Germany  
15 (n=10),(8,47–55) Australia (n=8),(2,4,11,56–60) Canada (n=4),(15,61–63) France  
16 (n=1),(5) Switzerland (n=1),(13) New Zealand (n=2),(64,65) Finland (n=2),(66,67)  
17  
18 Czech Republic (n=1),(68) Brazil (n=1)(69) and South Africa (n=1)(16) between 2002  
19  
20 and 2022. Most studies (63%, n=35) were published between 2018 and 2022.  
21  
22

23  
24 Methodologically, most studies were quantitative (55%, n=31) while the remainder  
25 used a qualitative (27%, n=15) or mixed-methods (18%, n=10) approach.  
26

27 Quantitative studies comprised of surveys

28 (n=12),(1,8,30,32,38,41,43,48,49,51,56,58) retrospective cohorts  
29 (n=9),(5,33,34,40,52,54,55,57,66) literature reviews (n=5),(11,46,61,64,68) case  
30  
31 series/reports (n=3)(6,13,35), a pre- and post-intervention study (n=1)(29) and a  
32  
33 prospective cohort (n=1).(8) Qualitative studies contained individual interviews  
34 (n=12),(7,14,16,26–28,31,42,44,47,65,69) focus group interviews (n=2),(2,63) and  
35  
36 deliberative dialogues (n=1),(62) while the mixed-methods  
37  
38 studies(4,15,36,37,39,45,50,59,60,67) made use of various survey and interview  
39  
40 combinations.  
41  
42

43  
44 EMS providers were the primary population in most studies (52%,  
45 n=29)(1,2,4,7,8,14,16,26–31,36–39,41,43–45,47–49,51,56,58,67,69) including  
46  
47 paramedics, doctors and nurses involved in out-of-hospital emergency care  
48  
49 dependant on EMS system model: paramedic-led (Anglo-American), physician-led  
50 (Franco-German). Other investigations were performed using patient records  
51 (n=10),(5,8,33,34,40,52,54,55,57,66) published literature (n=5),(11,46,61,64,68)  
52  
53 case reports/series (n=3),(6,13,35) stakeholders and experts (n=3),(42,50,62) mixed  
54  
55 populations including patients, families, paramedics, caregivers, palliative providers  
56  
57 and patient records (n=3),(15,59,63), EMS agencies (n=2)(32,60) and family  
58  
59 caregivers (n=1).(65)  
60

Study categories were EMS provider knowledge and perspectives (54%, n=30),(1,2,4,7,8,14,16,26–28,30,31,36–39,41–45,47–49,51,56,58,63,67,69) EMS-palliative integration (23%, n=13),(5,6,15,29,32,34,35,40,50,59,60,62,66) EMS-palliative intersection (14%, n=8)(8,13,33,52,54,55,57,65) and literature reviews (9%, n=5).(11,46,61,64,68) Studies concerning EMS provider knowledge and perspectives *vis à vis* palliative care focussed on EMS management and decision-making (n=9),(8,26,27,37,44,48,49,51,58) roles and barriers in palliative situations (n=11),(2,14,16,28,31,42,43,45,47,63,69) understanding and education (n=6),(1,4,30,38,39,67) identification of patients with palliative needs (n=2),(36,41) and potential solutions to overcome barriers (n=2).(7,56) Studies concerning EMS and palliative care integration focussed on effects of integration on patient transport, patient/family satisfaction and EMS provider confidence (n=7),(5,15,34,35,40,59,66) recommendations for integration (n=4)(6,29,50,62) and EMS palliative care protocols (n=2).(32,60) Studies concerning EMS and palliative care intersection focussed on the characteristics and frequency of patients with palliative needs encountered by EMS providers (n=4),(8,33,55,57) EMS provider treatment of these patients (n=3)(13,52,54) and the experience of family caregivers.(65) Literature reviews focussed on attitudes and perceptions of paramedics concerning EoL care (n=1),(46) EMS role in EoL care (n=1),(68) EMS palliative provision in community-based settings(n=1)(11) and rapid reviews of EMS and palliative care literature in Canada (n=1)(61) and New Zealand (n=1).(64)

Four predominant domains arose from included studies: 1) EMS' palliative care role, 2) Challenges faced by EMS in palliative situations, 3) EMS and palliative care integration benefits, 4) Proposed recommendations for EMS and palliative care integration.

### *EMS' palliative care role*

Numerous studies (66%, n=37)(1,2,6,8,11,14–16,26–28,31,34,35,37,41–46,48,51,53–55,57,59–61,63–69) discussed the potential role of EMS in palliative care. Most EMS providers viewed palliative care positively, regarding it as important to their role as demonstrated in studies performed in the UK,(43) Australia,(59) Canada,(15) and South Africa.(16) The EMS' palliative care role was frequently

1  
2  
3 highlighted due to the intersection between EMS and patients with palliative  
4 needs.(8,54,57) For example, an Australian study found palliative situations  
5 comprised 0.5% (n=4348) of the annual EMS caseload.(57) Other studies, found  
6 palliative situations may represent up to 10% of caseload and most EMS providers  
7 had previously encountered palliative situations.(8,47) Commonly documented  
8 reasons for EMS calls to palliative situations were sudden, unexpected patient  
9 deterioration, caregiver exhaustion and alarming signs and symptoms: dyspnoea,  
10 pain, convulsions, severe anxiety.(15,26,47) These calls often occurred out-of-office  
11 hours or during holidays when the usual patient caregivers were unavailable.(13)  
12 Specific EMS palliative care roles included complex care provision,(68) adjusting  
13 patient trajectory,(16) decision-making within limited information environments,(14)  
14 therapeutic interventions,(54) 24/7 availability, provision of homecare,(66) and  
15 improving patient and family quality of life, comfort, and confidence.(15)  
16  
17  
18  
19  
20  
21  
22  
23  
24  
25  
26  
27  
28

### 29 *Challenges faced by EMS in palliative situations*

30  
31 Most studies (63%, n=35)(1,2,6–8,11,13,14,16,26,27,30–33,36–38,40,41,43–  
32 47,49,51–54,58,61,67–69) highlighted various challenges EMS providers face in  
33 palliative situations. These challenges were EMS provider mindset,(1) the out-of-  
34 hospital environment,(16) EMS systems,(14) lack of education,(68) medico-legal  
35 confusion,(49) and inter-personal conflicts.(2) The EMS provider mindset is to ‘save  
36 lives’ through a curative approach to care, whereas the palliative approach is  
37 primarily supportive through prevention and relief of suffering.(1–3) Other common  
38 challenges were related to the complex out-of-hospital environment: lack of  
39 information, limited time, consequent difficult decision-making.(47)  
40  
41  
42  
43  
44  
45  
46

47 EMS system barriers to palliative provision were mandated hospital transport,(16)  
48 limited scope of practice(47) and lack of alternative care pathways.(14) Despite  
49 patient and family wishes and better clinical judgement, EMS providers often  
50 conveyed palliative patients to hospital due to system rigidity, fear of consequences  
51 and a lack of alternative care pathways.(14) Hospital transport was described as a  
52 safety net for EMS providers and, thus, their default decision in palliative situations.  
53  
54  
55  
56  
57 (44)  
58  
59  
60

1  
2  
3 Many studies identified a lack of EMS provider education concerning palliative  
4 care(2,16,36,43,47) and only five studies mentioned EMS providers with additional  
5 palliative or hospice care training in their samples.(4,8,36,53,56) The additional  
6 palliative training ranged from short course to post-graduate diploma level. This lack  
7 of education was identified in both physician and paramedic-led EMS systems.(8,16)

8  
9  
10  
11  
12 Highlighted medico-legal challenges for EMS providers in palliative situations were  
13 fear of litigation(47) and confusion surrounding legal documentation such as  
14 advance directives (ADs).(13,38,49). EMS providers were sometimes unaware of the  
15 presence of legal documentation due to lack of available information at  
16 incidents.(6,26,27) Furthermore, where legal documentation was presented, EMS  
17 providers were uncertain of legal implications in emergencies.(2,49)

18  
19  
20  
21  
22  
23 Finally, EMS providers described various conflicts requiring management in palliative  
24 situations. Conflicts arose with other health care providers, patients, families and  
25 within EMS providers themselves.(2) These conflicts were due to competing  
26 interests: patient wishes, family wishes, EMS protocols, EMS provider clinical  
27 judgement, medico-legal considerations.(16,26)

### 28 29 30 31 32 33 34 35 *EMS and palliative care integration benefits*

36  
37 Many studies (36%, n=20)(5,6,8,11,15,16,29,34,35,40–42,47,53,54,59,61–63,66)  
38 described benefits of EMS and palliative care integration: early palliative provision,  
39 home-based care, respect of patient autonomy, improved patient and family QoL,  
40 increased patient and family satisfaction and confidence, improved EMS provider  
41 confidence, and decreased healthcare costs. Conversely, the consequences of non-  
42 integration were disregard of patient autonomy, performance of aggressive or futile  
43 interventions, and poor management of palliative patients by EMS.(13,14)

44  
45  
46  
47  
48  
49  
50 Provision of early, home-based palliative care by EMS was found to improve patient  
51 and family QoL, satisfaction and confidence as demonstrated by Carter, et al.(15)  
52 This study found high patient and family satisfaction with palliative provision from  
53 EMS providers, observing their compassion and skill in symptom management.(15)  
54 Furthermore, knowledge of the 24/7 availability of EMS providers in this programme  
55  
56  
57  
58  
59  
60

1  
2  
3 provided confidence and peace of mind.(15) Paramedic comfort and confidence in  
4 palliative provision likewise improved during the study.(15)  
5  
6

7 Collaboration between EMS and palliative care networks was found to improve  
8 respect of patient autonomy.(5) An example was provided in a case study by  
9 Clemency, et al. where a terminally ill patient was transported home from hospital,  
10 extubated and allowed to die at home according to her wishes.(35) This was  
11 facilitated by EMS under the guidance of palliative care specialists and in conjunction  
12 with a broader multidisciplinary team.(35)  
13  
14  
15  
16  
17

18 Several studies discussed the potential decreased healthcare costs resulting from  
19 EMS and palliative integration.(41,59,61,66) The decreased costs would result from  
20 provision of homecare, thus avoiding expensive and unnecessary hospital  
21 admissions.(61) A Finish study evaluating the integration of paramedics in EoL care  
22 argued that healthcare costs may be diminished through provision of homecare by  
23 paramedics in particular.(66)  
24  
25  
26  
27  
28  
29  
30  
31

### 32 *Proposed recommendations for EMS and palliative care integration*

33 All 56 included studies made recommendations for EMS and palliative care  
34 integration. These were EMS provider education,(4) EMS and palliative system  
35 collaboration,(5) EMS palliative care guideline/protocol creation,(16) specialised out-  
36 of-hospital palliative care teams(34) and further research.(57) The following topics  
37 were highlighted as areas for EMS provider education: identifying patients with  
38 palliative needs,(41) palliative therapeutic goals,(44) legal documentation and  
39 advance care planning, ethics,(13) withholding and withdrawing treatment,(38,51)  
40 patient and family communication (including care-giver support),(47) symptom  
41 management,(54) interdisciplinary teamwork(59) and current palliative system  
42 structures.(58)  
43  
44  
45  
46  
47  
48  
49  
50

51  
52  
53  
54  
55  
56  
57  
58  
59  
60  
Lamba, et al. detailed four steps for EMS and palliative care integration: 1) Identify  
EMS 'champions', 2) Review protocols and literature, 3) Perform a needs  
assessment, 4) Create an action plan.(6) The authors argued that optimal palliative  
care begins out-of-hospital and, therefore, palliative and EMS systems should  
collaborate.(6) Such collaborations between palliative and EMS systems, making

1  
2  
3 use of newly developed palliative care guidelines and protocols for EMS providers,  
4 were successfully deployed in Canada,(15) Finland(66) and the USA.(34)  
5  
6

7 Concerning further research, the following areas were recommended: educational  
8 interventions,(46) development of EMS palliative care protocols,(16) defining the role  
9 of EMS in palliative situations,(2) development of EMS palliative care policies and  
10  
11 clarifying palliative care referral pathways,(2) cost-effectiveness of EMS and  
12  
13 palliative care integration.(40,59,66)  
14  
15  
16  
17  
18  
19

## 20 **DISCUSSION**

21  
22 This scoping review aimed to map existing EMS and palliative literature by  
23 identifying study types, extracting key findings, and noting limitations, thereby  
24 providing a summary of current evidence, context for EMS and palliative care  
25 integration and identifying knowledge gaps for future research.  
26  
27  
28

29  
30 The topic of EMS and palliative care has gathered momentum in recent years as the  
31 role of EMS systems in out-of-hospital care has expanded; most studies included in  
32 this review (63%, n=35) being published between 2018 and 2022. While the body of  
33 literature has grown, there remains a relative dearth of empirical evidence, with only  
34 56 such studies identified here since the turn of the millennium. Many of these  
35 studies are small in scale, presenting limited findings. Common limitations include  
36 small sample sizes, limited external validity, use of unvalidated survey instruments,  
37 self-selection bias, recall bias and those resulting from retrospective approaches.  
38  
39  
40  
41  
42  
43

44 Despite these limitations, the literature, when aggregated, is consistent across  
45 various contexts. For example, similar challenges to EMS palliative provision have  
46 been documented in both paramedic(26) and physician-led systems.(47) Moreover,  
47 findings regarding EMS role, challenges and integration benefits in palliative  
48 situations appear similar across high-income countries (HICs)(68) and low-to-middle  
49 income countries (LMICs),(16) demonstrating the ubiquitous nature of the out-of-  
50 hospital environment.  
51  
52  
53  
54  
55

56  
57 Of importance, only two studies in this review (3.5%) were performed in LMIC  
58 countries,(16,69) revealing a significant knowledge gap as LMIC contexts result in  
59  
60

1  
2  
3 amplified challenges, require different approaches, and thus have a great need for  
4 research.(70,71) Amplified EMS palliative care challenges result from  
5 disproportionately high burdens of disease and contemporaneous resource  
6 constraints.(71) HICs have reported that 0.5-10% of EMS caseload comprises  
7 palliative situations.(47,57) Within LMICs, however, this proportion is likely much  
8 larger as greater disease burdens result in more life-limiting illnesses and injuries  
9 and, therefore, more patients requiring palliation with which EMS may interact.(16)  
10 Subsequent problems are threefold: greater incidence of poor palliative situation  
11 management by EMS, increased strain on already limited EMS and hospital  
12 resources and overall increased healthcare system costs in these budget-  
13 constrained settings.  
14  
15  
16  
17  
18  
19  
20  
21  
22

23 Due to resource limitations, LMICs require novel approaches to these problems. The  
24 development of new, specialised out-of-hospital palliative care teams, for example,  
25 may not be feasible in LMICs. Capacitating already existing structures, EMS and  
26 palliative, to collaborate via alternative means may represent a more efficient use of  
27 scarce resources to achieve integration benefits.(59) Simply improving  
28 communication between the two systems may confer benefit as demonstrated by  
29 Dent, et al. where palliative telephonic advice was made available to EMS  
30 providers.(40) This potentially low-cost intervention was associated with decreased  
31 rates of hospital conveyance and should be researched in LMIC settings.(40) Similar  
32 integrative approaches have been successfully employed in HICs for mental health  
33 emergencies where mental healthcare workers have been linked with EMS and  
34 police to provide expert consult at point of care and thereby reduce unnecessary  
35 hospital conveyance.(72)  
36  
37  
38  
39  
40  
41  
42  
43  
44  
45

46 LMICs also represent a unique opportunity for EMS palliative care research globally.  
47 Where amplified problems exist, so may amplified benefits from developed solutions.  
48 The 1990 Commission on Health Research for Development affirmed that  
49 strengthening LMIC research capacity is *“one of the most powerful, cost-effective,  
50 and sustainable means of advancing health and development”*.(73) Not only would  
51 LMICs benefit greatly from resource efficient solutions, but these unique solutions  
52 would likewise benefit HICs where increasing health-care costs remain a  
53 challenge.(74) Considering these amplified problems, solutions and the need for  
54  
55  
56  
57  
58  
59  
60



1  
2  
3 contextually suitable approaches, the need for, and yet lack of, EMS palliative care  
4 LMIC research is striking.  
5

6  
7 While further research, particularly in LMICs, is needed, the existing literature  
8 supports, and indeed recommends, the integration of EMS and palliative care  
9 services whatever the context (paramedic vs. physician-led, HIC vs. LMIC).(5,16)  
10 Such integration would be congruous with the multi-disciplinary approach espoused  
11 by palliative care(3) and recommended by the World Health Organization  
12 (WHO).(75) The WHO has noted a growing demand for palliative care worldwide,  
13 with an insufficient corresponding supply of specialist palliative services.(75)  
14 Integration between palliative services and other disciplines is required to meet the  
15 need. Given the multi-disciplinary requirement of palliative care and the significant  
16 EMS palliative care intersection, integration between the two appears essential.  
17  
18

19  
20  
21  
22  
23  
24  
25  
26  
27  
28  
29  
30  
31  
32  
33  
34  
35  
36  
37  
38  
39  
40  
41  
42  
43  
44  
45  
46  
47  
48  
49  
50  
51  
52  
53  
54  
55  
56  
57  
58  
59  
60  
Though a need for integration exists the question as to precise EMS roles in  
palliative situations remains. Whatever the specifics, several unique features of EMS  
may compliment palliative care provision: first-responder role, 24/7 availability,  
homecare provision and emergency capabilities.(6,10,76,77) The earlier palliative  
care is implemented, the greater its efficacy.(78) EMS have the capability to both  
identify palliative needs and initiate palliative care immediately in their role as first  
responders.(6,76) Often patients with palliative needs wish to be treated at home but  
lack this option.(15) They may also suffer deleterious symptoms at any time of day or  
night requiring a hospital visit.(15) Out-of-hospital palliative care services frequently  
function exclusively during office hours leaving these patients without support.(13)  
The 24/7 availability of EMS, coupled with their homecare expertise, could  
ameliorate these gaps within palliative care provision and, in the not unlikely event of  
patient deterioration, EMS expertise in emergencies would be beneficial.(66)

Various recommendations to promote EMS and palliative care integration have been  
made. However, the priorities of these recommendations have not been established.  
It is likewise unclear from the literature whether EMS and palliative care integration  
itself is of high priority within individual countries or globally. Further research is  
required not only to prioritise recommendations for integration, but to prioritise EMS  
and palliative care integration within unique healthcare systems. Priorities will likely  
vary across disparate contexts; however, the literature suggests integration should

1  
2  
3 be favourably considered as it has potential to be a low-cost, high impact  
4 intervention aligned with WHO priorities. Such integration would result in improved  
5 palliative care provision and access,(16) providing these vulnerable patients with  
6 dignity through protection of their autonomy and avoidance of non-beneficial  
7 treatment. In addition, EMS and palliative care integration may result in cost and  
8 resource savings by decreasing hospital burdens.(61,66) This in turn would free  
9 resources for additional healthcare interventions. Other causal-sequence benefits  
10 may result including a unified healthcare approach and bringing together of siloed  
11 systems (EMS, palliative, in-hospital), which would result in further improved patient  
12 experience across the healthcare spectrum.

13  
14  
15  
16  
17  
18  
19  
20  
21 A concern regarding this integration is that this expanded role would strain EMS  
22 resources by increasing caseload and time spent per incident.(77) Further  
23 investigation into this concern is needed across various contexts. However, existing  
24 evidence has shown no increased strain on caseload(66) and while time spent on  
25 scene does appear increased in certain palliative situations, these involve provision  
26 of homecare without conveyance.(66,76) Total time spent per incident appears to  
27 decrease in these situations due to time-saving from avoidance of transport, hospital  
28 handover, ambulance cleaning and restocking.(76)

29  
30  
31  
32  
33  
34  
35 Research priorities regarding palliative care in the ED setting have been established  
36 by Quest, et al.:(79) 1) Which patients are in greatest need of palliative care services  
37 in the ED? 2) What is the optimal role of emergency clinicians in caring for patients  
38 along a chronic trajectory of illness? 3) What are the educational priorities for  
39 emergency clinical providers in the domain of palliative care? As EMS represent the  
40 out-of-hospital branch of emergency medicine, such priorities are germane.

41  
42  
43  
44  
45  
46  
47  
48  
49  
50  
51  
52  
53  
54  
55  
56  
57  
58  
59  
60  
Based on the included literature of this review, several specific EMS palliative care  
research gaps exist. There is a need for further epidemiological study, on a larger  
scale, across various contexts, particularly LMICs, to more accurately describe the  
burden of patients requiring palliative care upon EMS systems. Further intervention-  
based studies are required to test the effectiveness of various forms of EMS and  
palliative care integration, including their cost-effectiveness. Educational  
interventions require particular analysis as many questions remain unanswered:  
What EMS qualifications should be targeted? What content is most relevant? What  
level and type of intervention is required (i.e. undergraduate vs. post-graduate,

1  
2  
3 informal vs. formal). Qualitative interview studies with palliative patients, family  
4 members and palliative specialists concerning EMS use in palliative care are largely  
5 lacking and would be beneficial as these are primary role players. Finally, both  
6 quantitative and qualitative data is needed from other stakeholders such as medical  
7 insurance companies which often cover the costs of both EMS and palliative  
8 services.  
9  
10  
11  
12  
13  
14  
15

## 16 **LIMITATIONS**

17  
18 This review is not without limitation. Some relevant studies, including grey literature,  
19 may have been missed due to the selection criteria, databases searched, search  
20 string employed and researcher finitude. Furthermore, only English studies were  
21 selected. However, it is unlikely many relevant studies were omitted as a  
22 comprehensive search string was developed, piloted and employed in conjunction  
23 with a broad database range, meeting recommendations for an optimal search  
24 strategy. Finally, the conclusions of this review should be observed with equipoise  
25 given the limited external validity of many included studies, the need for further  
26 contextual and empirical evidence.  
27  
28  
29  
30  
31  
32  
33  
34  
35  
36

## 37 **CONCLUSION**

38  
39 Current literature suggests EMS and palliative care systems should integrate to  
40 improve palliative care provision. EMS have a role to play in out-of-hospital palliative  
41 care however, the specifics of this role require further investigation and are likely to  
42 differ across disparate contexts. Currently, when performing various functions in  
43 palliative situations, EMS providers are faced with several challenges which must be  
44 overcome to provide appropriate care. EMS provider education, collaboration  
45 between EMS and palliative systems, creation of EMS palliative care  
46 guidelines/protocols, creation of specialised out-of-hospital palliative care teams and  
47 further research have been recommended as solutions. Future research should  
48 focus on the prioritization, implementation, and effectiveness of these solutions  
49 cross-contextually; particularly in LMICs where the need, and potential impact, are  
50 most significant.  
51  
52  
53  
54  
55  
56  
57  
58  
59  
60

## AUTHOR CONTRIBUTIONS

CG, LG and WS designed the protocol. CG and CS collected data. CG drafted the manuscript with input from CS, LG and WS. All authors reviewed and gave final approval of the manuscript.

## COMPETING INTERESTS

The authors declare they have no competing interests.

## FUNDING

This research received no specific grant from any funding agency in the public, commercial or not-for-profit sectors.

## DATA SHARING STATEMENT

No additional data available.

## ETHICS APPROVAL

No participants were involved in the study and selected literature is publicly available, therefore, no ethical approval was required.

## REFERENCES

1. Waldrop D, Clemency B, Maguin E, Lindstrom H. Prehospital Providers' Perceptions of Emergency Calls Near Life's End. *Am J Hosp Palliat Care*. 2015;32(2):198–204.
2. Lord B, Récoché K, O'Connor M, et al. Paramedics' perceptions of Their Role in Palliative Care: Analysis of Focus Group Transcripts. *Journal of Palliative Care*. 2012;28(1):36-40.

- 1  
2  
3 3. WHO.int [Internet] c. 2022. Available from:  
4  
5 <https://www.who.int/cancer/palliative/definition/en/>. Accessed on: 13/12/2022.  
6
- 7 4. Rogers IR, Shearer FM, Ross-Adjie G, et al. Paramedics' perceptions and  
8 educational needs with respect to palliative care. *Australasian Journal of*  
9 *Paramedicine*. 2015;12(5):1-7.  
10  
11
- 12 5. Burnod A, Lenclud G, Ricard-Hibon A, et al. Collaboration between prehospital  
13 emergency medical teams and palliative care networks allows a better respect  
14 of a patient's will. *European Journal of Emergency Medicine*. 2021;19:46–47.  
15  
16
- 17 6. Lamba S, Schmidt TA, Chan GK, et al. Integrating Palliative Care in the Out-  
18 of-Hospital Setting: Four Things to Jump-Start an EMS-Palliative Care  
19 Initiative. *Prehospital Emergency Care*. 2013;17(4):511-520.  
20  
21
- 22 7. Patterson R, Standing H, Lee M, Dalkin S, et al. Paramedic information needs  
23 in end-of-life care: a qualitative interview study exploring access to a shared  
24 electronic record as a potential solution. *BMC Palliative Care*. 2019;18:1–8.  
25  
26
- 27 8. Wiese CHR, Bartels UE, Marczyńska K, et al. Quality of out-of-hospital  
28 palliative emergency care depends on the expertise of the emergency medical  
29 team - a prospective multi-centre analysis. *Support Care Cancer*.  
30 2009;17:1499–1506.  
31  
32
- 33 9. Schrijvers D, Fraeyenhove F Van. Emergencies in Palliative Care. *The Cancer*  
34 *Journal*. 2010;16(5):514–20.  
35  
36
- 37 10. Long D. Paramedic delivery of community-based palliative care: An overlooked  
38 resource? *Prog Palliat Care*. 2019;27(6):289–90.  
39  
40
- 41 11. Juhmann ML, Vandersman P, Butow PN, Clayton JM. Paramedics delivering  
42 palliative and end-of-life care in community-based settings: A systematic  
43 integrative review with thematic synthesis. *Palliat Med*. 2021;1-17.  
44  
45
- 46 12. Duchateau FX. Palliative care and prehospital emergency medicine -  
47 apparently conflicting approaches? *Eur J Emerg Med*. 2012;19:1.  
48  
49
- 50 13. Carron P, Dami F, Diawara F, et al. Palliative Care and Prehospital Emergency  
51 Medicine: Analysis of a Case Series. *Medicine (Baltimore)*. 2014;93(25):1–3.  
52  
53  
54  
55  
56  
57  
58  
59  
60

- 1  
2  
3 14. Hoare S, Kelly MP, Prothero L, Barclay S. Ambulance staff and end-of-life  
4 hospital admissions: A qualitative interview study. *Palliat Med*.  
5 2018;32(9):1465-1473.  
6  
7
- 8  
9 15. Carter AJE, Arab M, Rsw MSW, et al. Paramedics providing palliative care at  
10 home: A mixed-methods exploration of patient and family satisfaction and  
11 paramedic comfort and confidence. *CJEM*. 2020;21(4):513–22.  
12  
13
- 14 16. Gage CH, Geduld H, Stassen W. South African paramedic perspectives on  
15 prehospital palliative care. *BMC Palliat Care*. 2020;19(1):153.  
16  
17
- 18 17. Gage CH, Stander C, Gwyther L, Stassen W. Emergency medical services  
19 and palliative care: protocol for a scoping review. *BMJ Open*.  
20 2022;12:e062054.  
21  
22
- 23 18. Arksey H, O'Malley L. Scoping studies: towards a methodological framework.  
24 *Int J Soc Res Methodol*. 2005;8(1):19–32.  
25  
26
- 27 19. Aromataris E, Riitano D. Constructing a search strategy and searching for  
28 evidence. A guide to the literature search for a systematic review. *Am J Nurs*.  
29 2014 May;114(5):49-56.  
30  
31
- 32 20. Bramer WM, Rethlefsen ML, Kleijnen J, Franco OH. Optimal database  
33 combinations for literature searches in systematic reviews: a prospective  
34 exploratory study. *Syst Rev*. 2017;6:1–12.  
35  
36
- 37 21. Tieman JJ, Sladek RM, Currow DC. Multiple sources: mapping the literature of  
38 palliative care. *Palliat Med*. 2009 Jul;23(5):425-31.  
39  
40
- 41 22. Mendeley.com [Internet] c. 2022. Available from:  
42 <https://www.mendeley.com/download-reference-manager/>. Accessed on:  
43 13/12/2022.  
44  
45
- 46 23. Ouzzani M, Hammady H, Fedorowicz Z, Elmagarmid A. Rayyan - a web and  
47 mobile app for systematic reviews. *Systematic Reviews*. 2016;(5):210.  
48  
49
- 50 24. Prisma-statement.org [Internet] c. 2021. Available from: [http://www.prisma-](http://www.prisma-statement.org/documents/PRISMA-ScR-Fillable-Checklist_11Sept2019.pdf)  
51 [statement.org/documents/PRISMA-ScR-Fillable-Checklist\\_11Sept2019.pdf](http://www.prisma-statement.org/documents/PRISMA-ScR-Fillable-Checklist_11Sept2019.pdf).  
52 Accessed on: 07/06/2021.  
53  
54  
55  
56  
57  
58  
59  
60

- 1
  - 2
  - 3
  - 4
  - 5
  - 6
  - 7
  - 8
  - 9
  - 10
  - 11
  - 12
  - 13
  - 14
  - 15
  - 16
  - 17
  - 18
  - 19
  - 20
  - 21
  - 22
  - 23
  - 24
  - 25
  - 26
  - 27
  - 28
  - 29
  - 30
  - 31
  - 32
  - 33
  - 34
  - 35
  - 36
  - 37
  - 38
  - 39
  - 40
  - 41
  - 42
  - 43
  - 44
  - 45
  - 46
  - 47
  - 48
  - 49
  - 50
  - 51
  - 52
  - 53
  - 54
  - 55
  - 56
  - 57
  - 58
  - 59
  - 60
25. Page MJ, Moher D. Evaluations of the uptake and impact of the Preferred Reporting Items for Systematic reviews and Meta-Analyses (PRISMA) Statement and extensions: a scoping review. *Syst Rev.* 2017;6(1):263.
26. Waldrop DP, Clemency B, Lindstrom HA, Cordes CC. "We Are Strangers Walking Into Their Life-Changing Event": How Prehospital Providers Manage Emergency Calls at the End of Life. *J Pain Symptom Manage.* 2015;50(3):328–34.
27. Waldrop DP, McGinley JM, Dailey MW, Clemency B. Decision-Making in the Moments Before Death: Challenges in Prehospital Care. *Prehosp Emerg Care.* 2019;23(3):356–63.
28. Waldrop DP, McGinley JM, Clemency B. Mediating Systems of Care: Emergency Calls to Long-Term Care Facilities at Life's End. *J Palliat Med.* 2018;21(7):987–91.
29. Fitzpatrick S, Somers S, Stryckman B, Gingold DB. Improving Hospice and Palliative Care Through Nurse Practitioner Engagement in a Community Paramedicine Program. *J Nurse Pract.* 2022;18(7):769.
30. Wenger A, Potilechio M, Redinger K, et al. Care for a Dying Patient: EMS Perspectives on Caring for Hospice Patients. *J Pain Symptom Manag.* 2022;64(2):e71–6.
31. Breyre AM, Benesch T, Glomb NW, et al.. EMS Experience Caring and Communicating with Patients and Families with a Life-Limiting-Illness. *Prehosp Emerg Care.* 2022;26(5):708–15.
32. Ausband SC, March JA, Brown LH. National Prevalence of palliative care protocols in emergency medical services. *Prehosp Emerg Care.* 2002;6:36–41.
33. Breyre AM, Bains G, Moore J, et al. Hospice and Comfort Care Patient Utilization of Emergency Medical Services. *J Palliat Med.* 2021;1-6.
34. Breyre A, Taigman M, Salvucci A, Sporer K. Effect of a Mobile Integrated Hospice Healthcare Program on Emergency Medical Services Transport to the Emergency Department. *Prehosp Emerg Care.* 2021;1-6.
35. Clemency BM, Grimm KT, Lauer SL, et al. Transport Home and Terminal

- 1  
2  
3 Extubation by Emergency Medical Services: An Example of Innovation in End-  
4 of-Life Care. *J Pain Symptom Manage*. 2019;58(2):355–9.  
5  
6  
7 36. Donnelly CB, Armstrong KA, Perkins MM, et al. Emergency Medical Services  
8 Provider Experiences of Hospice Care. *Prehosp Emerg Care*. 2018;22(2):237–  
9 43.  
10  
11  
12  
13 37. McGinley J, Waldrop DP, Clemency B. Emergency medical services providers'  
14 perspective of end-of-life decision making for people with intellectual  
15 disabilities. *J Appl Res Intellect Disabil*. 2017;30(6):1057–64.  
16  
17  
18  
19 38. Stone SC, Abbott J, McClung CD, et al. Paramedic knowledge, attitudes, and  
20 training in end-of-life care. *Prehosp Disaster Med*. 2009;24(6):529–34.  
21  
22  
23 39. Waldrop DP, Clemency B, Maguin E, Lindstrom H. Preparation for frontline  
24 end-of-life care: exploring the perspectives of paramedics and emergency  
25 medical technicians. *J Palliat Med*. 2014;17(3):338–41.  
26  
27  
28  
29 40. Dent T, Tipping I, Anderson R, Daniels C. Hospice advice and rapid response  
30 service for ambulance clinicians. *BMJ Support Palliat Care*. 2020;10(3):296–9.  
31  
32  
33 41. Eaton-Williams P, Barrett J, Mortimer C, Williams J. A national survey of  
34 ambulance paramedics on the identification of patients with end of life care  
35 needs. *Br Paramed J*. 2020;5(3):8–14.  
36  
37  
38  
39 42. Goodwin L, Proctor A, Kirby K, et al. Staff stakeholder views on the role of UK  
40 paramedics in advance care planning for patients in their last year of life. *Prog*  
41 *Palliat Care*. 2021;29(2):76–83.  
42  
43  
44 43. Kirk A, Crompton PW, Knighting K, et al. Paramedics and their role in end-of-  
45 life care: perceptions and confidence. *J Paramed Pract*. 2017;9(2):71–9.  
46  
47  
48  
49 44. Murphy-Jones G, Timmons S. Paramedics' experiences of end-of-life care  
50 decision making with regard to nursing home residents: an exploration of  
51 influential issues and factors. *Emerg Med J*. 2016;33(10):722–6.  
52  
53  
54 45. Pease NJ, Sundararaj JJ, O'Brian E, Hayes J, Presswood E, Buxton S.  
55 Paramedics and serious illness: Communication training. *BMJ Support Palliat*  
56 *Care*. 2019;0:1-8.  
57  
58  
59  
60



- 1
- 2
- 3
- 4 46. Pentaris P, Mehmet N. Attitudes and perceptions of paramedics about end-of-
- 5 life care: a literature review. *J Paramed Pract.* 2019;11(5):206–15.
- 6
- 7
- 8 47. Kamphausen A, Roese H, Oechsle K, et al. Challenges Faced by Prehospital
- 9 Emergency Physicians Providing Emergency Care to Patients with Advanced
- 10 Incurable Diseases. *Emerg Med Int.* 2019;2019.
- 11
- 12
- 13 48. Leibold A, Lassen C, Lindenberg N, et al. Is every life worth saving: does
- 14 religion and religious beliefs influence paramedic’s end-of-life decision-
- 15 making? A prospective questionnaire-based investigation. *Indian J Palliat Care*
- 16 2018;24:9.
- 17
- 18
- 19
- 20
- 21 49. Taghavi M, Simon A, Kappus S, et al. Paramedics experiences and
- 22 expectations concerning advance directives: a prospective, questionnaire-
- 23 based, bi-centre study. *Palliat Med.* 2012;26(7):908–16.
- 24
- 25
- 26
- 27 50. Wiese CHR, Lassen CL, Bartels UE, et al. International recommendations for
- 28 outpatient palliative care and prehospital palliative emergencies – a
- 29 prospective questionnaire-based investigation. *BMC Palliative Care.*
- 30 2013;12:10.
- 31
- 32
- 33
- 34 51. Wiese CHR, Taghavi M, Meyer N, et al. Paramedics’ “end-of-life” decision
- 35 making in palliative emergencies. *J Paramed Pract.* 2012;4(7):413–9.
- 36
- 37
- 38 52. Wiese CHR, Bartels UE, Zausig YA, et al. Prehospital emergency treatment of
- 39 palliative care patients with cardiac arrest: a retrolective investigation. *Support*
- 40 *Care Cancer.* 2010;18(10):1287–92.
- 41
- 42
- 43
- 44 53. Wiese CHR, Bartels UE, Ruppert D, et al. Treatment of palliative care
- 45 emergencies by prehospital emergency physicians in Germany: an interview
- 46 based investigation. *Palliat Med.* 2009;23(4):369–73.
- 47
- 48
- 49
- 50 54. Wiese CHR, Barrels UE, Graf BM, Hanekop GG. Out-of-hospital opioid
- 51 therapy of palliative care patients with “acute dyspnoea”: a retrospective
- 52 multicenter investigation. *J Opioid Manag.* 2009;5(2):115–22.
- 53
- 54
- 55
- 56 55. Hauch H, El Mohau N, Wolff JEA, et al. Out-of-Hospital Emergencies in
- 57 Children Under Palliative Home Care. *Front Pediatr.* 2021;9.
- 58
- 59
- 60 56. James HSE, Smith AC, Thomas EE, et al. Exploring paramedics’ intention to

- 1  
2  
3 use a specialist palliative care telehealth service. *Prog Palliat Care*.  
4 2021;29(2):106–13.  
5  
6  
7 57. Lord B, Andrew E, Henderson A, et al. Palliative care in paramedic practice: A  
8 retrospective cohort study. *Palliat Med*. 2019;33(4):445–51.  
9  
10  
11 58. Mott C, Herbert A, Malcolm K, et al. Emergencies in Pediatric Palliative Care:  
12 A Survey of Ambulance Officers to Understand the Interface between Families  
13 and Ambulance Services. *J Palliat Med*. 2020;23(12):1649–52.  
14  
15  
16  
17 59. Swetenham K, Grantham H, Glaetzer K. Breaking down the silos:  
18 Collaboration delivering an efficient and effective response to palliative care  
19 emergencies. *Prog Palliat Care*. 2014;22(4):212–8.  
20  
21  
22  
23 60. Juhmann ML, Anderson NE, Boughey M, et al. Palliative paramedicine:  
24 Comparing clinical practice through guideline quality appraisal and qualitative  
25 content analysis. *Palliat Med*. 2022;36(8):1228–41.  
26  
27  
28  
29 61. Rosa A, Dissanayake M, Carter D, Sibbald S. Community paramedicine to  
30 support palliative care. *Prog Palliat Care*. 2021;1-5.  
31  
32  
33 62. Carter AJE, Harrison M, Kryworuchko J, et al. Essential Elements to  
34 Implementing a Paramedic Palliative Model of Care: An Application of the  
35 Consolidated Framework for Implementation Research. *J Palliat Med*.  
36 2022;25(9):1345–54.  
37  
38  
39  
40 63. Carter AJE, Harrison M, Goldstein J, et al. Providing palliative care at home  
41 aligns with the professional identity of paramedics: a qualitative study of  
42 paramedics and palliative health care providers. *Can J Emerg Med*.  
43 2022;24(7):751–9.  
44  
45  
46  
47  
48 64. McCormick G, Thompson SR. The Provision of Palliative and End-of-Life Care  
49 by Paramedics in New Zealand Communities: A Review of International  
50 Practice and the New Zealand Context. *Whitireia Nurs Heal J*. 2019;(26):51–7.  
51  
52  
53  
54 65. Anderson NE, Robinson J, Goodwin H, Gott M. “Mum, I think we might ring the  
55 ambulance, okay?” A qualitative exploration of bereaved family members’  
56 experiences of emergency ambulance care at the end of life. *Palliat Med*.  
57 2022;36(9):1389–95.  
58  
59  
60

- 1  
2  
3  
4  
5  
6  
7  
8  
9  
10  
11  
12  
13  
14  
15  
16  
17  
18  
19  
20  
21  
22  
23  
24  
25  
26  
27  
28  
29  
30  
31  
32  
33  
34  
35  
36  
37  
38  
39  
40  
41  
42  
43  
44  
45  
46  
47  
48  
49  
50  
51  
52  
53  
54  
55  
56  
57  
58  
59  
60
66. Surakka LK, Peake MM, Kiljunen MM, et al. Preplanned participation of paramedics in end-of-life care at home: A retrospective cohort study. *Palliat Med.* 2020;1-8.
67. Surakka LK, Hökkä M, Törrönen K, et al. Paramedics' experiences and educational needs when participating end-of-life care at home: A mixed method study. *Palliat Med.* 2022;36(8):1217–27.
68. Peran D, Uhlir M, Pekara J, et al. Approaching the End of Their Lives Under Blue Lights and Sirens – Scoping Review. *J Pain Symptom Manage.* 2021;1-11.
69. Boaventura JR, Pessalacia JDR, Ribeiro AA, et al. Palliative care in the pre-hospital service in Brazil: experiences of health professionals. *BMC Palliat Care.* 2022;21(1):1–11.
70. Gov.uk [Internet] c. 2022. Available from: [https://assets.publishing.service.gov.uk/media/5d42be4eed915d09d8945db9/SRIA\\_-\\_REA\\_final\\_\\_Dec\\_2019\\_Heart\\_\\_\\_003\\_.pdf](https://assets.publishing.service.gov.uk/media/5d42be4eed915d09d8945db9/SRIA_-_REA_final__Dec_2019_Heart___003_.pdf). Accessed on: 14/12/2022.
71. Franzen SRP, Chandler C, Lang T. Health research capacity development in low and middle income countries: Reality or rhetoric? A systematic meta-narrative review of the qualitative literature. *BMJ Open.* 2017;7(1).
72. Huppert D, Griffiths M. Police Mental Health Partnership project: Police Ambulance Crisis Emergency Response (PACER) model development. *Australas Psychiatry.* 2015;23(5):520–3.
73. Binns CW. Health Research-Essential Link to Equity in Development. *Asia Pacific Journal of Public Health.* 1990;4(4):278-278.
74. WHO.int [Internet]. c. 2022. Available from: <https://www.who.int/publications/i/item/who-his-hgf-hfworkingpaper-19.4>. Accessed on: 14/12/2022.
75. WHO.int [Internet]. c. 2022. Available from: <https://apps.who.int/iris/handle/10665/345532>. Accessed on: 14/12/2022.
76. Helmer J, Baranowski L, Armour R, et al. Developing a paramedic approach to palliative emergencies. *Prog Palliat Care.* 2021;29(2):72–5.

- 1  
2  
3 77. Pekarsky B, Seymour-Walsh A, Wright C, et al. The role of ambulance  
4 services in reducing the gaps in access to end-of-life care: from conversations  
5 to policy. *Prog Palliat Care*. 2021;29(2):98–105.  
6  
7  
8  
9 78. Rowland K. Palliative care: Earlier is better. *J Fam Pract*. 2010;59(12):695–7.  
10  
11 79. Quest TE, Asplin BR, Cairns CB, et al. Research priorities for palliative and  
12 end-of-life care in the emergency setting. *Acad Emerg Med*. 2011;18(6):e70-6.  
13  
14  
15  
16  
17

## 18 **FIGURE LEGEND**

19  
20 **Figure 1 – PRISMA Selection Process Flow Diagram(25)**  
21  
22  
23  
24  
25  
26  
27  
28  
29  
30  
31  
32  
33  
34  
35  
36  
37  
38  
39  
40  
41  
42  
43  
44  
45  
46  
47  
48  
49  
50  
51  
52  
53  
54  
55  
56  
57  
58  
59  
60

### CINAHL Search String

1  
2  
3  
4  
5  
6  
7  
8  
9  
10  
11  
12  
13  
14  
15  
16  
17  
18  
19  
20  
21  
22  
23  
24  
25  
26  
27  
28  
29  
30  
31  
32  
33  
34  
35  
36  
37  
38  
39  
40  
41  
42  
43  
44  
45  
46  
47  
48  
49  
50  
51  
52  
53  
54  
55  
56  
57  
58  
59  
60

("Palliative" OR "Palliative care" OR "Palliative medicine" OR "Palliative management" OR "Palliative nursing" OR "Palliative care nursing" OR "Palliative care nurse" OR "Palliative care nurses" OR "Palliative patient" OR "Palliative patients" OR "Palliation" OR "Palliative situation" OR "Palliative situations" OR "Palliative emergency" OR "Palliative emergencies" OR "Palliative care protocol" OR "Palliative care protocols" OR "Emergency palliative care" OR "Emergency palliation" OR "Early palliation" OR "Early palliative care" OR "Early hospice care" OR "Palliative unit" OR "Palliative units" OR "Palliative care unit" OR "Palliative care units" OR "Hospice care" OR "Hospice" OR "Hospice and palliative care nursing" OR "Hospice and palliative nursing" OR "Hospice and palliation" OR "Hospice nurse" OR "Hospice nurses" OR "Hospice physician" OR "Hospice physicians" OR "Hospice service" OR "Hospice services" OR "End of life care" OR "End of life" OR "Terminal care" OR "Terminal patient" OR "Terminal patients" OR "Terminal illness" OR "Terminal illnesses" OR "Terminally ill" OR "Dying patient" OR "Dying patients" OR "Chronic patient" OR "Chronic patients" OR "Chronic illness" OR "Chronic illnesses" OR "Chronic care" OR "Palliative home care" OR "Home based care" OR "Home care" OR "Home based palliative care" OR "Home palliative care" OR "Home palliation" OR "Palliative care team" OR "Palliative care teams" OR "Palliative care service" OR "Palliative care services" OR "Palliative service" OR "Palliative services" OR "Palliative specialist" OR "Palliative specialists" OR "Palliative physician" OR "Palliative physicians" OR "Palliative care physician" OR "Palliative care physicians" OR "Palliative doctor" OR "Palliative doctors" OR "Palliative care doctor" OR "Palliative care doctors" OR "Palliative care giver" OR "Palliative caregiver" OR "Palliative care givers" OR "Palliative caregivers" OR "Advance care plan" OR "Advance care planning" OR "Advanced disease" OR "Advanced diseases" OR "Prehospital palliative care" OR "Out of hospital palliative care") AND ("Emergency medical services" OR "EMS" OR "EMS staff" OR "EMS system" OR "Emergency medical system" OR "Emergency medical services system" OR "Emergency medical service system" OR "Emergency medical service protocol" OR "Emergency medical services protocol" OR "Emergency medical service protocols" OR "Emergency medical services protocols" OR "EMS protocol" OR "EMS protocols" OR "Emergency medical service" OR "Emergency health service" OR "Emergency health services")

1  
2  
3 OR "Emergency services" OR "Emergency care" OR "Emergency medical care" OR  
4 "Emergency healthcare" OR "Emergency treatment" OR "Emergency treatments" OR  
5 "Emergency medical treatment" OR "Emergency management" OR "Emergency  
6 medical management" OR "Out of hospital emergency care" OR "Prehospital care"  
7 OR "Prehospital emergency care" OR "Pre hospital" OR "Prehospital" OR "Out of  
8 hospital" OR "Out-of-hospital" OR "Paramedic" OR "Paramedics" OR "Emergency  
9 paramedic" OR "Emergency paramedics" OR "Ambulance" OR "Ambulances" OR  
10 "Ambulance staff" OR "Emergency medical provider" OR "Emergency medical  
11 providers" OR "Emergency medical technician" OR "Emergency medical technicians"  
12 OR "Emergency medical practitioner" OR "Emergency medical practitioners" OR  
13 "Emergency provider" OR "Emergency providers" OR "Emergency technician" OR  
14 "Emergency technicians" OR "Emergency practitioner" OR "Emergency practitioners"  
15 OR "Prehospital emergency provider" OR "Prehospital emergency providers" OR  
16 "Emergency responder" OR "Emergency responders" OR "First responder" OR "First  
17 responders" OR "Emergency doctor" OR "Emergency doctors" OR "Emergency  
18 medical doctor" OR "Emergency medical doctors" OR "Emergency physician" OR  
19 "Emergency physicians" OR "Emergency medical physician" OR "Emergency  
20 medical physicians" OR "Emergency clinician" OR "Emergency clinicians" OR  
21 "Emergency medical clinician" OR "Emergency medical clinicians" OR "Emergency  
22 medical staff" OR "Emergency medical personnel" OR "Transfer" OR "Transfers" OR  
23 "Interhospital transfer" OR "Interhospital transfers" OR "Home transfer" OR "Transfer  
24 home" OR "Emergency medical team" OR "Emergency medical teams")

#### Embase (Scopus) Search String

25  
26  
27  
28  
29  
30  
31  
32  
33  
34  
35  
36  
37  
38  
39  
40  
41  
42  
43  
44  
45  
46 TITLE-ABS-KEY(("Palliative" OR "Palliative care" OR "Palliative medicine" OR  
47 "Palliative management" OR "Palliative nursing" OR "Palliative care nursing" OR  
48 "Palliative care nurse" OR "Palliative care nurses" OR "Palliative patient" OR  
49 "Palliative patients" OR "Palliation" OR "Palliative situation" OR "Palliative situations"  
50 OR "Palliative emergency" OR "Palliative emergencies" OR "Palliative care protocol"  
51 OR "Palliative care protocols" OR "Emergency palliative care" OR "Emergency  
52 palliation" OR "Early palliation" OR "Early palliative care" OR "Early hospice care"  
53 OR "Palliative unit" OR "Palliative units" OR "Palliative care unit" OR "Palliative care  
54 units" OR "Hospice care" OR "Hospice" OR "Hospice and palliative care nursing" OR  
55  
56  
57  
58  
59  
60

1  
2  
3 "Hospice and palliative nursing" OR "Hospice and palliation" OR "Hospice nurse" OR  
4 "Hospice nurses" OR "Hospice physician" OR "Hospice physicians" OR "Hospice  
5 service" OR "Hospice services" OR "End of life care" OR "End of life" OR "Terminal  
6 care" OR "Terminal patient" OR "Terminal patients" OR "Terminal illness" OR  
7 "Terminal illnesses" OR "Terminally ill" OR "Dying patient" OR "Dying patients" OR  
8 "Chronic patient" OR "Chronic patients" OR "Chronic illness" OR "Chronic illnesses"  
9 OR "Chronic care" OR "Palliative home care" OR "Home based care" OR "Home  
10 care" OR "Home based palliative care" OR "Home palliative care" OR "Home  
11 palliation" OR "Palliative care team" OR "Palliative care teams" OR "Palliative care  
12 service" OR "Palliative care services" OR "Palliative service" OR "Palliative services"  
13 OR "Palliative specialist" OR "Palliative specialists" OR "Palliative physician" OR  
14 "Palliative physicians" OR "Palliative care physician" OR "Palliative care physicians"  
15 OR "Palliative doctor" OR "Palliative doctors" OR "Palliative care doctor" OR  
16 "Palliative care doctors" OR "Palliative care giver" OR "Palliative caregiver" OR  
17 "Palliative care givers" OR "Palliative caregivers" OR "Advance care plan" OR  
18 "Advance care planning" OR "Advanced disease" OR "Advanced diseases" OR  
19 "Prehospital palliative care" OR "Out of hospital palliative care") AND ("Emergency  
20 medical services" OR "EMS" OR "EMS staff" OR "EMS system" OR "Emergency  
21 medical system" OR "Emergency medical services system" OR "Emergency medical  
22 service system" OR "Emergency medical service protocol" OR "Emergency medical  
23 services protocol" OR "Emergency medical service protocols" OR "Emergency  
24 medical services protocols" OR "EMS protocol" OR "EMS protocols" OR "Emergency  
25 medical service" OR "Emergency health service" OR "Emergency health services"  
26 OR "Emergency services" OR "Emergency care" OR "Emergency medical care" OR  
27 "Emergency healthcare" OR "Emergency treatment" OR "Emergency treatments"  
28 OR "Emergency medical treatment" OR "Emergency management" OR "Emergency  
29 medical management" OR "Out of hospital emergency care" OR "Prehospital care"  
30 OR "Prehospital emergency care" OR "Pre hospital" OR "Prehospital" OR "Out of  
31 hospital" OR "Out-of-hospital" OR "Paramedic" OR "Paramedics" OR "Emergency  
32 paramedic" OR "Emergency paramedics" OR "Ambulance" OR "Ambulances" OR  
33 "Ambulance staff" OR "Emergency medical provider" OR "Emergency medical  
34 providers" OR "Emergency medical technician" OR "Emergency medical  
35 technicians" OR "Emergency medical practitioner" OR "Emergency medical  
36 practitioners" OR "Emergency provider" OR "Emergency providers" OR "Emergency

1  
2  
3 technician" OR "Emergency technicians" OR "Emergency practitioner" OR  
4 "Emergency practitioners" OR "Prehospital emergency provider" OR "Prehospital  
5 emergency providers" OR "Emergency responder" OR "Emergency responders" OR  
6 "First responder" OR "First responders" OR "Emergency doctor" OR "Emergency  
7 doctors" OR "Emergency medical doctor" OR "Emergency medical doctors" OR  
8 "Emergency physician" OR "Emergency physicians" OR "Emergency medical  
9 physician" OR "Emergency medical physicians" OR "Emergency clinician" OR  
10 "Emergency clinicians" OR "Emergency medical clinician" OR "Emergency medical  
11 clinicians" OR "Emergency medical staff" OR "Emergency medical personnel" OR  
12 "Transfer" OR "Transfers" OR "Interhospital transfer" OR "Interhospital transfers" OR  
13 "Home transfer" OR "Transfer home" OR "Emergency medical team" OR  
14 "Emergency medical teams")) AND NOT INDEX(medline)

#### PsycInfo Search String

15  
16 ("Palliative" OR "Palliative care" OR "Palliative medicine" OR "Palliative  
17 management" OR "Palliative nursing" OR "Palliative care nursing" OR "Palliative care  
18 nurse" OR "Palliative care nurses" OR "Palliative patient" OR "Palliative patients" OR  
19 "Palliation" OR "Palliative situation" OR "Palliative situations" OR "Palliative  
20 emergency" OR "Palliative emergencies" OR "Palliative care protocol" OR "Palliative  
21 care protocols" OR "Emergency palliative care" OR "Emergency palliation" OR "Early  
22 palliation" OR "Early palliative care" OR "Early hospice care" OR "Palliative unit" OR  
23 "Palliative units" OR "Palliative care unit" OR "Palliative care units" OR "Hospice  
24 care" OR "Hospice" OR "Hospice and palliative care nursing" OR "Hospice and  
25 palliative nursing" OR "Hospice and palliation" OR "Hospice nurse" OR "Hospice  
26 nurses" OR "Hospice physician" OR "Hospice physicians" OR "Hospice service" OR  
27 "Hospice services" OR "End of life care" OR "End of life" OR "Terminal care" OR  
28 "Terminal patient" OR "Terminal patients" OR "Terminal illness" OR "Terminal  
29 illnesses" OR "Terminally ill" OR "Dying patient" OR "Dying patients" OR "Chronic  
30 patient" OR "Chronic patients" OR "Chronic illness" OR "Chronic illnesses" OR  
31 "Chronic care" OR "Palliative home care" OR "Home based care" OR "Home care"  
32 OR "Home based palliative care" OR "Home palliative care" OR "Home palliation"  
33 OR "Palliative care team" OR "Palliative care teams" OR "Palliative care service" OR  
34  
35  
36  
37  
38  
39  
40  
41  
42  
43  
44  
45  
46  
47  
48  
49  
50  
51  
52  
53  
54  
55  
56  
57  
58  
59  
60



1  
2  
3 “Palliative care services” OR “Palliative service” OR “Palliative services” OR  
4 “Palliative specialist” OR “Palliative specialists” OR “Palliative physician” OR  
5 “Palliative physicians” OR “Palliative care physician” OR “Palliative care physicians”  
6 OR “Palliative doctor” OR “Palliative doctors” OR “Palliative care doctor” OR  
7 “Palliative care doctors” OR “Palliative care giver” OR “Palliative caregiver” OR  
8 “Palliative care givers” OR “Palliative caregivers” OR “Advance care plan” OR  
9 “Advance care planning” OR “Advanced disease” OR “Advanced diseases” OR  
10 “Prehospital palliative care” OR “Out of hospital palliative care”) AND (“Emergency  
11 medical services” OR “EMS” OR “EMS staff” OR “EMS system” OR “Emergency  
12 medical system” OR “Emergency medical services system” OR “Emergency medical  
13 service system” OR “Emergency medical service protocol” OR “Emergency medical  
14 services protocol” OR “Emergency medical service protocols” OR “Emergency  
15 medical services protocols” OR “EMS protocol” OR “EMS protocols” OR “Emergency  
16 medical service” OR “Emergency health service” OR “Emergency health services”  
17 OR “Emergency services” OR “Emergency care” OR “Emergency medical care” OR  
18 “Emergency healthcare” OR “Emergency treatment” OR “Emergency treatments” OR  
19 “Emergency medical treatment” OR “Emergency management” OR “Emergency  
20 medical management” OR “Out of hospital emergency care” OR “Prehospital care”  
21 OR “Prehospital emergency care” OR “Pre hospital” OR “Prehospital” OR “Out of  
22 hospital” OR “Out-of-hospital” OR “Paramedic” OR “Paramedics” OR “Emergency  
23 paramedic” OR “Emergency paramedics” OR “Ambulance” OR “Ambulances” OR  
24 “Ambulance staff” OR “Emergency medical provider” OR “Emergency medical  
25 providers” OR “Emergency medical technician” OR “Emergency medical technicians”  
26 OR “Emergency medical practitioner” OR “Emergency medical practitioners” OR  
27 “Emergency provider” OR “Emergency providers” OR “Emergency technician” OR  
28 “Emergency technicians” OR “Emergency practitioner” OR “Emergency practitioners”  
29 OR “Prehospital emergency provider” OR “Prehospital emergency providers” OR  
30 “Emergency responder” OR “Emergency responders” OR “First responder” OR “First  
31 responders” OR “Emergency doctor” OR “Emergency doctors” OR “Emergency  
32 medical doctor” OR “Emergency medical doctors” OR “Emergency physician” OR  
33 “Emergency physicians” OR “Emergency medical physician” OR “Emergency  
34 medical physicians” OR “Emergency clinician” OR “Emergency clinicians” OR  
35 “Emergency medical clinician” OR “Emergency medical clinicians” OR “Emergency  
36 medical staff” OR “Emergency medical personnel” OR “Transfer” OR “Transfers” OR  
37  
38  
39  
40  
41  
42  
43  
44  
45  
46  
47  
48  
49  
50  
51  
52  
53  
54  
55  
56  
57  
58  
59  
60

1  
2  
3 “Interhospital transfer” OR “Interhospital transfers” OR “Home transfer” OR “Transfer  
4 home” OR “Emergency medical team” OR “Emergency medical teams”)  
5  
6  
7  
8  
9

#### 10 MEDLINE (PubMed) Search String

11 (“Palliative”[tw] OR “Palliative care”[tw] OR “Palliative medicine”[tw] OR “Palliative  
12 management”[tw] OR “Palliative nursing”[tw] OR “Palliative care nursing”[tw] OR  
13 “Palliative care nurse”[tw] OR “Palliative care nurses”[tw] OR “Palliative patient”[tw]  
14 OR “Palliative patients”[tw] OR “Palliation”[tw] OR “Palliative situation”[tw] OR  
15 “Palliative situations”[tw] OR “Palliative emergency”[tw] OR “Palliative  
16 emergencies”[tw] OR “Palliative care protocol”[tw] OR “Palliative care protocols”[tw]  
17 OR “Emergency palliative care”[tw] OR “Emergency palliation”[tw] OR “Early  
18 palliation”[tw] OR “Early palliative care”[tw] OR “Early hospice care”[tw] OR  
19 “Palliative unit”[tw] OR “Palliative units”[tw] OR “Palliative care unit”[tw] OR “Palliative  
20 care units”[tw] OR “Hospice care”[tw] OR “Hospice”[tw] OR “Hospice and palliative  
21 care nursing”[tw] OR “Hospice and palliative nursing”[tw] OR “Hospice and  
22 palliation”[tw] OR “Hospice nurse”[tw] OR “Hospice nurses”[tw] OR “Hospice  
23 physician”[tw] OR “Hospice physicians”[tw] OR “Hospice service”[tw] OR “Hospice  
24 services”[tw] OR “End of life care”[tw] OR “End of life”[tw] OR “Terminal care”[tw] OR  
25 “Terminal patient”[tw] OR “Terminal patients”[tw] OR “Terminal illness”[tw] OR  
26 “Terminal illnesses”[tw] OR “Terminally ill”[tw] OR “Dying patient”[tw] OR “Dying  
27 patients”[tw] OR “Chronic patient”[tw] OR “Chronic patients”[tw] OR “Chronic  
28 illness”[tw] OR “Chronic illnesses”[tw] OR “Chronic care”[tw] OR “Palliative home  
29 care”[tw] OR “Home based care”[tw] OR “Home care”[tw] OR “Home based palliative  
30 care”[tw] OR “Home palliative care”[tw] OR “Home palliation”[tw] OR “Palliative care  
31 team”[tw] OR “Palliative care teams”[tw] OR “Palliative care service”[tw] OR  
32 “Palliative care services”[tw] OR “Palliative service”[tw] OR “Palliative services”[tw]  
33 OR “Palliative specialist”[tw] OR “Palliative specialists”[tw] OR “Palliative  
34 physician”[tw] OR “Palliative physicians”[tw] OR “Palliative care physician”[tw] OR  
35 “Palliative care physicians”[tw] OR “Palliative doctor”[tw] OR “Palliative doctors”[tw]  
36 OR “Palliative care doctor”[tw] OR “Palliative care doctors”[tw] OR “Palliative care  
37 giver”[tw] OR “Palliative caregiver”[tw] OR “Palliative care givers”[tw] OR “Palliative  
38 caregivers”[tw] OR “Advance care plan”[tw] OR “Advance care planning”[tw] OR  
39  
40  
41  
42  
43  
44  
45  
46  
47  
48  
49  
50  
51  
52  
53  
54  
55  
56  
57  
58  
59  
60

1  
2  
3 “Advanced disease”[tw] OR “Advanced diseases”[tw] OR “Prehospital palliative  
4 care”[tw] OR “Out of hospital palliative care”[tw] OR “Palliative care”[mh] OR  
5 “Hospice and palliative care nursing”[mh] OR “Palliative medicine”[mh]) AND  
6 (“Emergency medical services”[tw] OR “EMS”[tw] OR “EMS staff”[tw] OR “EMS  
7 system”[tw] OR “Emergency medical system”[tw] OR “Emergency medical services  
8 system”[tw] OR “Emergency medical service system”[tw] OR “Emergency medical  
9 service protocol”[tw] OR “Emergency medical services protocol”[tw] OR “Emergency  
10 medical service protocols”[tw] OR “Emergency medical services protocols”[tw] OR  
11 “EMS protocol”[tw] OR “EMS protocols”[tw] OR “Emergency medical service”[tw] OR  
12 “Emergency health service”[tw] OR “Emergency health services”[tw] OR “Emergency  
13 services”[tw] OR “Emergency care”[tw] OR “Emergency medical care”[tw] OR  
14 “Emergency healthcare”[tw] OR “Emergency treatment”[tw] OR “Emergency  
15 treatments”[tw] OR “Emergency medical treatment”[tw] OR “Emergency  
16 management”[tw] OR “Emergency medical management”[tw] OR “Out of hospital  
17 emergency care”[tw] OR “Prehospital care”[tw] OR “Prehospital emergency care”[tw]  
18 OR “Pre hospital”[tw] OR “Prehospital”[tw] OR “Out of hospital”[tw] OR “Out-of-  
19 hospital”[tw] OR “Paramedic”[tw] OR “Paramedics”[tw] OR “Emergency  
20 paramedic”[tw] OR “Emergency paramedics”[tw] OR “Ambulance”[tw] OR  
21 “Ambulances”[tw] OR “Ambulance staff”[tw] OR “Emergency medical provider”[tw]  
22 OR “Emergency medical providers”[tw] OR “Emergency medical technician”[tw] OR  
23 “Emergency medical technicians”[tw] OR “Emergency medical practitioner”[tw] OR  
24 “Emergency medical practitioners”[tw] OR “Emergency provider”[tw] OR “Emergency  
25 providers”[tw] OR “Emergency technician”[tw] OR “Emergency technicians”[tw] OR  
26 “Emergency practitioner”[tw] OR “Emergency practitioners”[tw] OR “Prehospital  
27 emergency provider”[tw] OR “Prehospital emergency providers”[tw] OR “Emergency  
28 responder”[tw] OR “Emergency responders”[tw] OR “First responder”[tw] OR “First  
29 responders”[tw] OR “Emergency doctor”[tw] OR “Emergency doctors”[tw] OR  
30 “Emergency medical doctor”[tw] OR “Emergency medical doctors”[tw] OR  
31 “Emergency physician”[tw] OR “Emergency physicians”[tw] OR “Emergency medical  
32 physician”[tw] OR “Emergency medical physicians”[tw] OR “Emergency clinician”[tw]  
33 OR “Emergency clinicians”[tw] OR “Emergency medical clinician”[tw] OR  
34 “Emergency medical clinicians”[tw] OR “Emergency medical staff”[tw] OR  
35 “Emergency medical personnel”[tw] OR “Transfer”[tw] OR “Transfers”[tw] OR  
36 “Interhospital transfer”[tw] OR “Interhospital transfers”[tw] OR “Home transfer”[tw]  
37  
38  
39  
40  
41  
42  
43  
44  
45  
46  
47  
48  
49  
50  
51  
52  
53  
54  
55  
56  
57  
58  
59  
60

1  
2  
3 OR "Transfer home"[tw] OR "Emergency medical team"[tw] OR "Emergency medical  
4 teams"[tw] OR "Emergency medical technicians"[mh] OR "Ambulances"[mh] OR  
5 "Emergency medical services"[mh])  
6  
7  
8  
9

### 10 11 Web of Science Search String

12  
13  
14 (TS=((("Palliative" OR "Palliative care" OR "Palliative medicine" OR "Palliative  
15 management" OR "Palliative nursing" OR "Palliative care nursing" OR "Palliative care  
16 nurse" OR "Palliative care nurses" OR "Palliative patient" OR "Palliative patients" OR  
17 "Palliation" OR "Palliative situation" OR "Palliative situations" OR "Palliative  
18 emergency" OR "Palliative emergencies" OR "Palliative care protocol" OR "Palliative  
19 care protocols" OR "Emergency palliative care" OR "Emergency palliation" OR "Early  
20 palliation" OR "Early palliative care" OR "Early hospice care" OR "Palliative unit" OR  
21 "Palliative units" OR "Palliative care unit" OR "Palliative care units" OR "Hospice  
22 care" OR "Hospice" OR "Hospice and palliative care nursing" OR "Hospice and  
23 palliative nursing" OR "Hospice and palliation" OR "Hospice nurse" OR "Hospice  
24 nurses" OR "Hospice physician" OR "Hospice physicians" OR "Hospice service" OR  
25 "Hospice services" OR "End of life care" OR "End of life" OR "Terminal care" OR  
26 "Terminal patient" OR "Terminal patients" OR "Terminal illness" OR "Terminal  
27 illnesses" OR "Terminally ill" OR "Dying patient" OR "Dying patients" OR "Chronic  
28 patient" OR "Chronic patients" OR "Chronic illness" OR "Chronic illnesses" OR  
29 "Chronic care" OR "Palliative home care" OR "Home based care" OR "Home care"  
30 OR "Home based palliative care" OR "Home palliative care" OR "Home palliation"  
31 OR "Palliative care team" OR "Palliative care teams" OR "Palliative care service" OR  
32 "Palliative care services" OR "Palliative service" OR "Palliative services" OR  
33 "Palliative specialist" OR "Palliative specialists" OR "Palliative physician" OR  
34 "Palliative physicians" OR "Palliative care physician" OR "Palliative care physicians"  
35 OR "Palliative doctor" OR "Palliative doctors" OR "Palliative care doctor" OR  
36 "Palliative care doctors" OR "Palliative care giver" OR "Palliative caregiver" OR  
37 "Palliative care givers" OR "Palliative caregivers" OR "Advance care plan" OR  
38 "Advance care planning" OR "Advanced disease" OR "Advanced diseases" OR  
39 "Prehospital palliative care" OR "Out of hospital palliative care") ) ) AND  
40  
41  
42  
43  
44  
45  
46  
47  
48  
49  
50  
51  
52  
53  
54  
55  
56  
57  
58  
59  
60  
60 TS=((("Emergency medical services" OR "EMS" OR "EMS staff" OR "EMS system"

1  
2  
3 OR "Emergency medical system" OR "Emergency medical services system" OR  
4 "Emergency medical service system" OR "Emergency medical service protocol" OR  
5 "Emergency medical services protocol" OR "Emergency medical service protocols"  
6 OR "Emergency medical services protocols" OR "EMS protocol" OR "EMS protocols"  
7 OR "Emergency medical service" OR "Emergency health service" OR "Emergency  
8 health services" OR "Emergency services" OR "Emergency care" OR "Emergency  
9 medical care" OR "Emergency healthcare" OR "Emergency treatment" OR  
10 "Emergency treatments" OR "Emergency medical treatment" OR "Emergency  
11 management" OR "Emergency medical management" OR "Out of hospital  
12 emergency care" OR "Prehospital care" OR "Prehospital emergency care" OR "Pre  
13 hospital" OR "Prehospital" OR "Out of hospital" OR "Out-of-hospital" OR "Paramedic"  
14 OR "Paramedics" OR "Emergency paramedic" OR "Emergency paramedics" OR  
15 "Ambulance" OR "Ambulances" OR "Ambulance staff" OR "Emergency medical  
16 provider" OR "Emergency medical providers" OR "Emergency medical technician"  
17 OR "Emergency medical technicians" OR "Emergency medical practitioner" OR  
18 "Emergency medical practitioners" OR "Emergency provider" OR "Emergency  
19 providers" OR "Emergency technician" OR "Emergency technicians" OR "Emergency  
20 practitioner" OR "Emergency practitioners" OR "Prehospital emergency provider" OR  
21 "Prehospital emergency providers" OR "Emergency responder" OR "Emergency  
22 responders" OR "First responder" OR "First responders" OR "Emergency doctor" OR  
23 "Emergency doctors" OR "Emergency medical doctor" OR "Emergency medical  
24 doctors" OR "Emergency physician" OR "Emergency physicians" OR "Emergency  
25 medical physician" OR "Emergency medical physicians" OR "Emergency clinician"  
26 OR "Emergency clinicians" OR "Emergency medical clinician" OR "Emergency  
27 medical clinicians" OR "Emergency medical staff" OR "Emergency medical  
28 personnel" OR "Transfer" OR "Transfers" OR "Interhospital transfer" OR  
29 "Interhospital transfers" OR "Home transfer" OR "Transfer home" OR "Emergency  
30 medical team" OR "Emergency medical teams"))  
31  
32  
33  
34  
35  
36  
37  
38  
39  
40  
41  
42  
43  
44  
45  
46  
47  
48  
49  
50  
51  
52  
53  
54  
55  
56  
57  
58  
59  
60

**Table 1 – Summary of Included Studies**

| Author, Year, Setting                   | Aim(s)                                                                                                                                                                                                         | Methodology                       | Population and Sample Size | Outcomes and Significant Findings                                                                                                                                                                                                                       | Limitations                                                                                                                                              |
|-----------------------------------------|----------------------------------------------------------------------------------------------------------------------------------------------------------------------------------------------------------------|-----------------------------------|----------------------------|---------------------------------------------------------------------------------------------------------------------------------------------------------------------------------------------------------------------------------------------------------|----------------------------------------------------------------------------------------------------------------------------------------------------------|
| Anderson, et al.<br>2022<br>New Zealand | <i>“To explore bereaved family members’ experiences of emergency ambulance care at the end of life.”</i>                                                                                                       | Qualitative Individual Interviews | 38 Family Caregivers       | Key themes: 1) Supporting living and dying at home. 2) Urgent and unexpected events. 3) Reluctance in calling an ambulance. EMS providers play a vital role in providing palliative care. This should be integrated into policy, practice and training. | Possibility of self-selection and recall biases. Limited external validity.                                                                              |
| Ausband, et al.<br>2002<br>USA          | <i>“To determine the prevalence of palliative care protocols among EMS agencies in the United States, and to estimate the percentage of the U.S. population covered by such protocols”.</i>                    | Descriptive Survey                | 121 EMS Agencies           | 5.8% of EMS Agencies have palliative care protocols. Thus, there is a lack of EMS palliative care protocols in the USA.                                                                                                                                 | Response rate 60.5%. ‘Palliative Care Protocol’ was not defined. Thus, EMS palliative care protocols may be more or less prevalent than 5.8%.            |
| Boaventura, et al.<br>2022<br>Brazil    | <i>“To identify the perception of health professionals regarding the concept of PC [Palliative Care] and their care experiences with this type of patient in a pre-hospital care (PHC) service in Brazil.”</i> | Qualitative Individual Interviews | 25 EMS Providers           | Key themes: 1) Unpreparedness of the team. 2) Decision Making. 3) Dysthanasia. There is a need for EMS provider palliative care training and policy development in Brazil.                                                                              | Possibility of self-selection and recall biases. Limited external validity.                                                                              |
| Breyre, et al.<br>2021<br>USA           | <i>“To provide a descriptive analysis of hospice and comfort care patient EMS utilization in Alameda County [California, USA]”.</i>                                                                            | Retrospective Cohort              | 534 Patient Records        | 0.2% (n=534) of EMS calls were for hospice patients. Of these, 468 (87.6%) were transported to hospital. Most commonly encountered symptoms: respiratory distress, altered mental status. Fentanyl                                                      | Some hospice patients potentially missed due to incomplete/inaccurate documentation and an inability to identify serial EMS calls from a single patient. |

|                                  |                                                                                                                                                                                                   |                                   |                  |                                                                                                                                                                                                                                                                                                                                                                                                |                                                                                                                                                                                                                                    |
|----------------------------------|---------------------------------------------------------------------------------------------------------------------------------------------------------------------------------------------------|-----------------------------------|------------------|------------------------------------------------------------------------------------------------------------------------------------------------------------------------------------------------------------------------------------------------------------------------------------------------------------------------------------------------------------------------------------------------|------------------------------------------------------------------------------------------------------------------------------------------------------------------------------------------------------------------------------------|
|                                  |                                                                                                                                                                                                   |                                   |                  | administration was the most common intervention. Although EMS encountered hospice patients infrequently, they should be prepared for such cases.                                                                                                                                                                                                                                               |                                                                                                                                                                                                                                    |
| Breyre, et al.<br>2021<br>USA    | <i>"To evaluate the effect of a Mobile Integrated Hospice Healthcare (MIHH) program including hospice education and expansion of paramedic scope of practice to use hospice medication kits".</i> | Retrospective Cohort              | 523 MIHH Cases   | MIHH program reduced emergency department transport rates from 80.3% to 19.6%. The expanded scope medication kit was used only once. This collaboration between hospice and EMS systems was successful in reducing hospice patient transport to the emergency department, possibly improving hospice patient and family care.                                                                  | No comparison with transport rates in non-hospice patients over the study period. Reasons for patient transport inconsistently documented. Method of screening for hospice patients may not have identified all eligible patients. |
| Breyre, et al.<br>2022<br>USA    | <i>"To explore EMS provider challenges, self-perceived roles and training experiences caring for patients and families with life-limiting illness."</i>                                           | Qualitative Individual Interviews | 15 EMS Providers | Key themes: 1) In the moment decision making dilemmas. 2) Respond to varied grief reactions. 3) Disadvantaged/vulnerable populations have less access to care and advance care planning. 4) Transport people. 5) Holistic care. 6) Lack of formal training. Formal training of EMS providers in palliative care principles would empower them to care for patients with life-limiting illness. | Possibility of self-selection and recall biases. Limited external validity.                                                                                                                                                        |
| Burnod, et al.<br>2012<br>France | <i>"To evaluate whether patient's wishes were respected by prehospital emergency medical teams after implementing</i>                                                                             | Retrospective Cohort              | 40 Patients      | Collaboration between prehospital emergency teams and palliative care networks allows prehospital teams to access information relevant to                                                                                                                                                                                                                                                      | No limitations listed by the authors; however, the sample size was small.                                                                                                                                                          |

|                                    |                                                                                                                                                                                                                                                                                                                                       |                                    |                                                                                                                                             |                                                                                                                                                                                                                                                                                                                                                                                                              |                                                                                                     |
|------------------------------------|---------------------------------------------------------------------------------------------------------------------------------------------------------------------------------------------------------------------------------------------------------------------------------------------------------------------------------------|------------------------------------|---------------------------------------------------------------------------------------------------------------------------------------------|--------------------------------------------------------------------------------------------------------------------------------------------------------------------------------------------------------------------------------------------------------------------------------------------------------------------------------------------------------------------------------------------------------------|-----------------------------------------------------------------------------------------------------|
|                                    | <i>collaboration and a standardized process between a community-based palliative network and the Emergency Medical Service (EMS) system</i> ".                                                                                                                                                                                        |                                    |                                                                                                                                             | their patients and results in greater respect of palliative patient wishes (83% of the time compared with 40% where no collaboration exists).                                                                                                                                                                                                                                                                |                                                                                                     |
| Carron, et al. 2014<br>Switzerland | To highlight "end of-life and palliative care situations that may be encountered by prehospital emergency services".                                                                                                                                                                                                                  | Retrospective Case Series          | 4 Cases                                                                                                                                     | Palliative and prehospital emergency care may be complimentary approaches. Analysed cases demonstrate the need for palliative education in prehospital emergency teams and collaboration between EMS and palliative systems.                                                                                                                                                                                 | Limited review of 4 cases. Findings and suggestions are open to biased interpretations.             |
| Carter, et al. 2022<br>Canada      | "To describe the essential elements, barriers, and facilitators for implementation, spread, and scale of the Program [Paramedics Providing Palliative Care at Home] from two perspectives: one system that implemented the Program and one system that had not, using the Consolidated Framework for Implementation Research (CFIR)." | Qualitative Deliberative Dialogues | 20 stakeholders (9 EMS Providers, 7 Palliative Providers, 2 Program Administrators, 1 Primary Care Provider, 1 Emergency Medicine Provider) | Key elements for implementation of the <i>Paramedics Providing Palliative Care at Home Program</i> : 1) Cosmopolitanism (outer setting). 2) Adaptability (intervention). 3) Implementation climate (inner setting). 4) Engagement and Planning (processes). Scaling this program would be beneficial for patient satisfaction and further paramedic confidence in caring for patients with palliative needs. | Possibility of self-selection and group biases. Lack of member-checking. Limited external validity. |
| Carter, et al. 2022<br>Canada      | "To explore, from the perspectives of paramedics and palliative health care providers, the alignment of a palliative care role with paramedic professional identity."                                                                                                                                                                 | Qualitative Focus Group Interviews | 11 Paramedics, 20 Health Care Providers                                                                                                     | Key themes concerning EMS provider role: 1) Patient centeredness and job satisfaction. 2) Bridging. 3) Advocate and educator. 4) Psychosocial support. Key themes concerning EMS provider                                                                                                                                                                                                                    | Possibility of self-selection and group biases. Limited external validity.                          |



|                                  |                                                                                                                                                                                                                                                                             |                                                                                                        |                                                                                                                                                                 |                                                                                                                                                                                                                                                                                                                                 |                                                                                                                     |
|----------------------------------|-----------------------------------------------------------------------------------------------------------------------------------------------------------------------------------------------------------------------------------------------------------------------------|--------------------------------------------------------------------------------------------------------|-----------------------------------------------------------------------------------------------------------------------------------------------------------------|---------------------------------------------------------------------------------------------------------------------------------------------------------------------------------------------------------------------------------------------------------------------------------------------------------------------------------|---------------------------------------------------------------------------------------------------------------------|
|                                  |                                                                                                                                                                                                                                                                             |                                                                                                        |                                                                                                                                                                 | identity: 1) Evolution of paramedicine as a skilled clinical profession. 2) Helping people and communities. 3) Paramedic skill set aligns with work in palliative care. 4) Changing paramedic mindset. Palliative care provision is well-aligned with EMS provider identity.                                                    |                                                                                                                     |
| Carter, et al.<br>2019<br>Canada | <i>"To determine the impact of the program [Paramedics Providing Palliative Care at Home] in two parts: Part A examined patient and family/caregiver satisfaction, and Part B measured paramedic comfort and confidence with the delivery of palliative care support"</i> . | Mixed Methods:<br>Part A: Telephonic Interviews, Surveys. Part B: Pre- vs. Post- Intervention Surveys. | Part A (Patients/Families): 18 Telephonic Interviews and 67 surveys.<br>Part B (Paramedics ): 235 Pre- Intervention Surveys and 267 Post- Intervention Surveys. | After programme implementation, paramedic comfort and confidence providing palliative and end-of-life care improved. Paramedics viewed palliative care as important and rewarding in their work. Furthermore, patient/family satisfaction was high. Families particularly highlighted paramedic compassion and professionalism. | Small sample size and low survey response rates. Time-lapse between paramedic arrival and patient/family interview. |
| Clemency, et al.<br>2019<br>USA  | To <i>"describe a terminal extubation performed by a paramedic under the direct supervision of an Emergency Medical Services (EMS) physician"</i> .                                                                                                                         | Case Report                                                                                            | 1 Case                                                                                                                                                          | With guidance, terminal extubation is possible out-of-hospital. Allowing for EMS involvement in this and other palliative interventions would simplify logistics and allow patients the option of a home death.                                                                                                                 | Single case description.                                                                                            |
| Dent, et al.<br>2020<br>UK       | To <i>"report the patient characteristics and outcomes of a</i>                                                                                                                                                                                                             | Retrospective Cohort                                                                                   | 45 Telephonic Calls                                                                                                                                             | Telephonic advice service was associated with low rates of patient transport to hospital (16%,                                                                                                                                                                                                                                  | Quality of advice not studied. Small sample size in a paramedic-led system                                          |

|                                |                                                                                                                                                                                 |                                      |                         |                                                                                                                                                                                                                                                                                                                                                             |                                                                                                                                             |
|--------------------------------|---------------------------------------------------------------------------------------------------------------------------------------------------------------------------------|--------------------------------------|-------------------------|-------------------------------------------------------------------------------------------------------------------------------------------------------------------------------------------------------------------------------------------------------------------------------------------------------------------------------------------------------------|---------------------------------------------------------------------------------------------------------------------------------------------|
|                                | <i>24-hour hospice nursing telephone advice service to support an ambulance service”.</i>                                                                                       |                                      |                         | n=7). Access to palliative advice can support ambulance clinicians and is feasible. Ambulance clinicians viewed this as an invaluable resource.                                                                                                                                                                                                             | limiting external validity. Telephonic advice may not have been sought in all cases as EMS do not have a palliative care call-out category. |
| Donnelly, et al. 2018 USA      | <i>“To assess the knowledge, attitudes, and experiences of EMS providers in the hospice care setting”.</i>                                                                      | Mixed Methods Cross-Sectional Survey | 182 EMS Providers       | Majority of EMS providers (84.1%, n=153) have managed a hospice patient at least once. 29.1% (n=53) reported receiving formal education on hospice patient care. EMS providers expressed a need for education and difficulties with communication and information in managing hospice patients.                                                             | Single-centre study, limiting external validity. Unvalidated survey.                                                                        |
| Eaton-Williams, et al. 2020 UK | <i>“To assess whether ambulance paramedics currently identify EoLC patients, are aware of identification guidance and believe this role is appropriate for their practice”.</i> | Cross-Sectional Online Survey        | 1643 Paramedics         | Majority of paramedics (97.0%, n=1594) felt they should contribute to identifying end-of-life care needs. Current barriers to this role: lack of access to patient medical records, insufficient education and communication difficulties. Establishing end-of-life referral pathways and receiving education were identified as facilitators of this role. | Possibility of self-selection bias. Impossible to verify participants' qualifications and experience.                                       |
| Fitzpatrick, et al. 2022 USA   | <i>“To provide structured, evidence-based palliative and hospice education to CPs [Community Paramedics].”</i>                                                                  | Pre- and Post-intervention Study     | 14 Community Paramedics | Paramedics play a role in the care of terminal patients. Formal palliative training within community paramedic programs should be implemented. The educational intervention of this                                                                                                                                                                         | Small sample size. Unclear survey questions.                                                                                                |

|                                      |                                                                                                                                                                                                                                       |                                   |                                                                                                                                           |                                                                                                                                                                                                                                                                                                                                    |                                                                             |
|--------------------------------------|---------------------------------------------------------------------------------------------------------------------------------------------------------------------------------------------------------------------------------------|-----------------------------------|-------------------------------------------------------------------------------------------------------------------------------------------|------------------------------------------------------------------------------------------------------------------------------------------------------------------------------------------------------------------------------------------------------------------------------------------------------------------------------------|-----------------------------------------------------------------------------|
|                                      |                                                                                                                                                                                                                                       |                                   |                                                                                                                                           | study increased community paramedics' knowledge regarding EoL communication.                                                                                                                                                                                                                                                       |                                                                             |
| Gage, et al.<br>2020<br>South Africa | <i>"To gather the perspectives of advanced life support (ALS) providers within the South African private EMS sector regarding pre-hospital palliative care in terms of its importance, feasibility and barriers to its practice."</i> | Qualitative Individual Interviews | 6 Paramedics                                                                                                                              | Key themes: 1) Need for pre-hospital palliative care. 2) Function of pre-hospital healthcare providers concerning palliative care. 3) Challenges to pre-hospital palliative care. 4) Ideas for implementing pre-hospital palliative care. Pre-hospital palliative care is needed in South Africa and EMS may play a valuable role. | Possibility of self-selection bias. Limited external validity.              |
| Goodwin, et al.<br>2021<br>UK        | <i>"To explore staff stakeholder views on the role of UK paramedics in advance care planning, including the use of the Gold Standards Framework Proactive Identification Guidance for screening and referral of patients"</i> .       | Qualitative Individual Interviews | 17 Stakeholders (8 Paramedics, 4 General Practitioners, 2 Emergency Department Doctors, 2 Emergency Department Nurses, 1 Community Nurse) | Key themes: 1) A lack of advance care planning. 2) Variation across health conditions. 3) A lack of joined-up care. 4) Poor-quality end of life conversations. UK paramedics are well positioned to screen patients for advance care planning.                                                                                     | Possibility of self-selection and recall biases. Limited external validity. |
| Hauch, et al.<br>2021<br>Germany     | To answer the questions: <i>"Which EMS operations occurred in the patients cared for in the SPHC [Specialized Home Palliative Care], and how frequent were they?"</i>                                                                 | Retrospective Cohort              | 172 Paediatric Patient Records                                                                                                            | Despite existence of a 24/7 specialised palliative home care service, some parents of children with palliative needs still contacted EMS in emergency situations (12%, n=20). Within                                                                                                                                               | Small sample size. Limited external validity.                               |

|                                    |                                                                                                                                                                                                                                                                          |                                   |                   |                                                                                                                                                                                                                                                                                                                                                                                        |                                                                                                                                                     |
|------------------------------------|--------------------------------------------------------------------------------------------------------------------------------------------------------------------------------------------------------------------------------------------------------------------------|-----------------------------------|-------------------|----------------------------------------------------------------------------------------------------------------------------------------------------------------------------------------------------------------------------------------------------------------------------------------------------------------------------------------------------------------------------------------|-----------------------------------------------------------------------------------------------------------------------------------------------------|
|                                    | <i>What treatments were given, and what was the outcome? Which possible associated factors can be identified that triggered the emergency call?"</i>                                                                                                                     |                                   |                   | this group, EMS were contacted 27 times. These patients were less likely to have a do not resuscitate order, required more home visits and were under SPHC care for longer when compared to the non-EMS group. Collaboration between palliative and emergency services is needed.                                                                                                      |                                                                                                                                                     |
| Hoare, et al.<br>2018<br>UK        | <i>"To understand the role of ambulance staff in the admission to hospital of patients close to the end of life".</i>                                                                                                                                                    | Qualitative Individual Interviews | 6 Ambulance Staff | Ambulance staff play an important role in end-of-life patient hospital admissions. Their ability to keep patients at home is hindered by: 1) The limited availability and accessibility of additional care support in the community. 2) The limited information ambulance staff had about the patient and their condition. 3) A perceived ambulance service emphasis on hospital care. | Possibility of self-selection and recall biases. Limited external validity.                                                                         |
| James, et al.<br>2021<br>Australia | <i>"To understand paramedics' intentions to use a hypothetical Specialist Palliative Care telehealth service, based on their perceptions of the service (i.e. usefulness, ease of use, and attitude toward to the service) and their palliative care self-efficacy".</i> | Descriptive Online Survey         | 112 Paramedics    | All variables were positively correlated with an intention to use a Specialist Palliative Care telehealth service apart from age and palliative care self-efficacy, which was negatively correlated. Thus, paramedics displayed a desire to use the service despite high palliative care self-efficacy ratings.                                                                        | Possibility of self-selection bias. Desirability/positivity bias in that attitudes are often positive to new technology in a hypothetical scenario. |

|                                                |                                                                                                                                                                                                                             |                                                             |                                         |                                                                                                                                                                                                                                                                                                                                                                                                                                                      |                                                                                                                           |
|------------------------------------------------|-----------------------------------------------------------------------------------------------------------------------------------------------------------------------------------------------------------------------------|-------------------------------------------------------------|-----------------------------------------|------------------------------------------------------------------------------------------------------------------------------------------------------------------------------------------------------------------------------------------------------------------------------------------------------------------------------------------------------------------------------------------------------------------------------------------------------|---------------------------------------------------------------------------------------------------------------------------|
| <p>Juhrmann, et al.<br/>2022<br/>Australia</p> | <p><i>“To examine the quality and content of existing Australian palliative paramedicine guidelines with a sample of guidelines from comparable Anglo-American ambulance services.”</i></p>                                 | <p>Guideline Quality Appraisal and Qualitative Analysis</p> | <p>8 Palliative Care EMS Guidelines</p> | <p>Overall, guideline quality was poor to moderate according to the AGREE II instrument, however, this does not refer to clinical validity. Key themes from guideline analysis: 1) Audience and approach. 2) Communication is key. 3) Assessing and managing symptoms. 4) Looking beyond pharmaceuticals. 5) Seeking support. 6) Care after death.</p>                                                                                               | <p>Potentially relevant information may have been missed as EMS guidelines not palliative/EoL specific were excluded.</p> |
| <p>Juhrmann, et al.<br/>2021<br/>Australia</p> | <p><i>“To review and synthesise the empirical evidence regarding paramedics delivering palliative and end-of-life care in community based settings.”</i></p>                                                                | <p>Systematic Literature Review</p>                         | <p>23 Articles</p>                      | <p>Key themes: 1) Broadening the traditional role. 2) Understanding patient wishes. 3) Supporting families. Paramedics can play an important role in facilitating home-based death and reducing unnecessary hospital admissions.</p>                                                                                                                                                                                                                 | <p>Selected articles limited to English. Some relevant articles potentially omitted.</p>                                  |
| <p>Kamphausen, et al.<br/>2019<br/>Germany</p> | <p><i>“To investigate challenges faced by emergency physicians (EPs) who provide prehospital emergency care to patients with advanced incurable diseases and family caregivers in their familiar home environment”.</i></p> | <p>Qualitative Individual Interviews</p>                    | <p>24 Emergency Physicians</p>          | <p>Key themes: 1) Structural conditions of prehospital emergency care. 2) Medical documentation and orders. 3) Finding optimal and patient-centred therapy. 4) Uncertainty about legal consequences. 5) Challenges at the individual (EP) level. 6) Challenges at the emergency team level. 7) Family caregiver’s emotions, coping, and understanding of patient’s illness. 8) Patient’s wishes, coping, and understanding of patient’s illness.</p> | <p>Possibility of self-selection and recall biases. Limited external validity.</p>                                        |

|                                    |                                                                                                                                                                                                                                                                                                                                                                                |                                                                                     |                                                                                                       |                                                                                                                                                                                                                                                                                                   |                                                                                                                  |
|------------------------------------|--------------------------------------------------------------------------------------------------------------------------------------------------------------------------------------------------------------------------------------------------------------------------------------------------------------------------------------------------------------------------------|-------------------------------------------------------------------------------------|-------------------------------------------------------------------------------------------------------|---------------------------------------------------------------------------------------------------------------------------------------------------------------------------------------------------------------------------------------------------------------------------------------------------|------------------------------------------------------------------------------------------------------------------|
|                                    |                                                                                                                                                                                                                                                                                                                                                                                |                                                                                     |                                                                                                       | 9) Social, cultural, and religious background of patients and families.                                                                                                                                                                                                                           |                                                                                                                  |
| Knighting, et al.<br>2017<br>UK    | To answer the questions, “do paramedics view end-of-life care as a key part of their role and are they confident in managing this aspect of their clinical practice? Further to this, what are the underlying concerns of paramedics when managing end-of-life care”?                                                                                                          | Descriptive<br>Online<br>Survey                                                     | 182<br>Paramedics                                                                                     | Paramedics saw end-of-life care as essential to their function. Fear of litigation and conflict with patient family members were identified as challenges in palliative care provision. Education is needed for paramedic confidence.                                                             | Impossible to verify participants' experience and qualifications. Low response rate.                             |
| Lamba, et al.<br>2013<br>USA       | “To 1) review four case scenarios that relate to palliative care and may be commonly encountered in the out-of-hospital setting and 2) provide a road map by suggesting four things to do to start an EMS-palliative care initiative in order to optimize out-of-hospital care of the seriously ill and increase preparedness of EMS providers in these difficult situations”. | Collaborative<br>Plan of Action<br>(IPAL-EM<br>project) with<br>Case<br>Discussions | Plan of<br>action to<br>integrate<br>palliative<br>and<br>prehospital<br>care. 4 Case<br>Discussions. | Four steps to begin an EMS-palliative initiative: 1) Identify EMS ‘champions’. 2) Review protocols and literature. 3) Needs assessment. 4) Create action plan. Ideally, palliative care begins out-of-hospital. This study represents a guideline for the integration of palliative and EMS care. | Requires implementation in various settings as well as study to determine effectiveness. Limited case review.    |
| Leibold, et al.<br>2018<br>Germany | “To determine whether or not a paramedic's decision-making in end-of-life situations is influenced by his/her religious beliefs, how they decide given the current judicial framework, and how they would decide were there legal certainty”.                                                                                                                                  | Descriptive<br>Online<br>Survey                                                     | 429<br>Paramedics                                                                                     | Religious beliefs play a role in influencing paramedic decision-making, however, experience, background, special training and legal framework conditions, appear to have greater influence.                                                                                                       | Possibility of self-selection bias. Unvalidated survey. Limited religions and beliefs represented across sample. |

|                                                                            |                                          |                                                                                                                                                                                                                                                                                                                                     |                                            |                                                        |                                                                                                                                                                                                                                                                                                                                                      |                                                                                                                     |
|----------------------------------------------------------------------------|------------------------------------------|-------------------------------------------------------------------------------------------------------------------------------------------------------------------------------------------------------------------------------------------------------------------------------------------------------------------------------------|--------------------------------------------|--------------------------------------------------------|------------------------------------------------------------------------------------------------------------------------------------------------------------------------------------------------------------------------------------------------------------------------------------------------------------------------------------------------------|---------------------------------------------------------------------------------------------------------------------|
| 1<br>2<br>3<br>4<br>5<br>6<br>7<br>8<br>9<br>10<br>11<br>12<br>13          | Lord, et al.<br>2019<br>Australia        | <i>“To describe the incidence and nature of cases attended by paramedics and the care provided where the reason for attendance was associated with a history of palliative care”.</i>                                                                                                                                               | Retrospective Cohort                       | 4348 Patient Records                                   | Identified cases were 0.5% of caseload during study period. Most common assessments by paramedics were ‘respiratory’ (20.1%), ‘pain’ (15.8%) and ‘deceased’ (7.9%). Majority of patients were transported (74.4%, n=3237) with hospital the most prevalent destination (99.5%, n=3221).                                                              | Emergencies and reasons for paramedic calls may have been unrelated to palliative condition.                        |
| 14<br>15<br>16<br>17<br>18<br>19<br>20<br>21                               | Lord, et al.<br>2012<br>Australia        | <i>“To identify paramedics’ knowledge, beliefs, and attitudes related to the care of patients requiring palliative care in community health settings”.</i>                                                                                                                                                                          | Qualitative Focus Group Interviews         | 3 focus group interviews with a total of 26 paramedics | Key themes: conflict in care goals, legal problems, lack of information, system problems. Further research suggested for education, guidelines and defining roles of paramedics in palliative care patient management.                                                                                                                               | Low response rate possibly resulting in an unrepresentative sample. Possibility of self-selection and group biases. |
| 22<br>23<br>24<br>25<br>26<br>27<br>28<br>29<br>30<br>31<br>32<br>33<br>34 | McCormick, et al.<br>2019<br>New Zealand | <i>“To understand the role New Zealand paramedics have as providers of community and pre-hospital palliative and EOL care, as well as to ascertain whether paramedics are suitably equipped and educated to provide quality palliative care to an increasingly elderly population with non-curable life-threatening illnesses”.</i> | Rapid Literature Review                    | 4 Articles                                             | No New Zealand articles or guidelines were found. New Zealand Ministry of Health documents provide minimal reference to pre-hospital emergency medical providers. Paramedics already provide palliative and end-of-life care. They are willing to continue this provision, with improved education and better integration with other care providers. | Small sample of articles. Two databases searched. Lack of quality appraisal.                                        |
| 35<br>36<br>37<br>38<br>39<br>40<br>41<br>42<br>43<br>44<br>45<br>46       | McGinley, et al.<br>2017<br>USA          | <i>“To describe how medical orders inform EMS providers’ decision making during emergencies involving</i>                                                                                                                                                                                                                           | Mixed-Methods: Descriptive Cross-Sectional | 239 Surveys and 48 Interviews of EMS Providers         | Many EMS providers (62.7%) had treated a patient with both an intellectual disability and medical orders directing end-of-life care. Key themes: 1) Provider                                                                                                                                                                                         | Possibility of self-selection bias. Limited external validity. Unvalidated survey.                                  |

|                                    |                                                                                                                                                                                                                                      |                                   |                       |                                                                                                                                                                                                                                                                                                                                                                                                             |                                                                             |
|------------------------------------|--------------------------------------------------------------------------------------------------------------------------------------------------------------------------------------------------------------------------------------|-----------------------------------|-----------------------|-------------------------------------------------------------------------------------------------------------------------------------------------------------------------------------------------------------------------------------------------------------------------------------------------------------------------------------------------------------------------------------------------------------|-----------------------------------------------------------------------------|
|                                    | <i>people with intellectual disabilities who are near life's end by considering the multiple (individual, organizational, sociocultural) contexts within which these decisions occur".</i>                                           | Survey and Individual Interviews  |                       | familiarity. 2) Organizational processes. 3) Sociocultural context.                                                                                                                                                                                                                                                                                                                                         |                                                                             |
| Mott, et al.<br>2020<br>Australia  | <i>"To explore the experiences and attitudes of ambulance officers in managing pediatric patients with palliative care needs".</i>                                                                                                   | Descriptive Online Survey         | 22 Ambulance Officers | Many ambulance officers found these cases to be challenging and their confidence levels varied. They were most likely to use correspondence provided by the family as a guide for management. Half of participants felt paediatrics receiving palliative care should have a 'not for resuscitation' order. They suggested support for themselves could be improved through increased patient documentation. | Small sample size. Possibility of self-selection and recall biases.         |
| Murphy-Jones, et al.<br>2016<br>UK | <i>"To explore how paramedics make decisions when asked to transport nursing home residents nearing the end of their lives".</i>                                                                                                     | Qualitative Individual Interviews | 6 Paramedics          | Key themes: 1) The challenges in understanding patients' wishes. 2) Evaluating patients' best interests. 3) The influence of others on decision making.                                                                                                                                                                                                                                                     | Possibility of self-selection and recall biases. Limited external validity. |
| Patterson, et al.<br>2019<br>UK    | <i>To investigate "the extent to which access to, and quality of, patient information affects the care paramedics provide to patients nearing end-of-life, and their views on access to a shared electronic record as a means of</i> | Qualitative Individual Interviews | 10 Paramedics         | Key themes: 1) Access to information on patients nearing end-of-life. 2) Views on the proposed Electronic Palliative Care Coordination System (EPaCCS). Lack of access to patient information is a barrier to paramedics delivering end-of-life care. Access to EPaCCS may                                                                                                                                  | Possibility of self-selection and recall biases. Limited external validity. |



|                                         |                                                                                                                                                                                                |                                                                                                                |                                           |                                                                                                                                                                                                                                                                                                                                                                                                |                                                                                                      |
|-----------------------------------------|------------------------------------------------------------------------------------------------------------------------------------------------------------------------------------------------|----------------------------------------------------------------------------------------------------------------|-------------------------------------------|------------------------------------------------------------------------------------------------------------------------------------------------------------------------------------------------------------------------------------------------------------------------------------------------------------------------------------------------------------------------------------------------|------------------------------------------------------------------------------------------------------|
|                                         | <i>improving the information flow around end-of-life care”.</i>                                                                                                                                |                                                                                                                |                                           | assist, but practical and technical challenges must be overcome for implementation.                                                                                                                                                                                                                                                                                                            |                                                                                                      |
| Pease, et al.<br>2019<br>UK             | To “describe the delivery, outcomes and potential impact of the Serious Illness Conversation project delivered to Welsh Ambulance Service Trust (WAST) staff”.                                 | Mixed-Methods:<br>Open-Ended Question Surveys, Pre- vs. Post- Intervention Surveys, Patient Care Record Review | 218 Paramedics and 150 Paramedic Students | Participants view themselves as playing several roles in end-of-life care: ‘facilitators’ to patient-centred and seamless care, providing support, link between services and practical help. Barriers to providing end of life care centred around communication challenges. The Serious Illness Conversation training resulted in increased participant confidence handling these situations. | Self-assessment of confidence. Review of patient care records not specific to training participants. |
| Pentaris, et al.<br>2019<br>UK          | To explore “current knowledge and evidence about paramedics’ attitudes and perceptions about end-of-life care”.                                                                                | Systematic Literature Review                                                                                   | 11 Articles                               | Key themes: 1) Critical incidents and emotional resilience. 2) Decision making. 3) Communicating death. 4) Recognising dying patients. 5) Death education. A dearth of literature exists concerning paramedics and end-of-life practice.                                                                                                                                                       | Selected articles limited to English. Some relevant articles potentially omitted.                    |
| Peran, et al.<br>2021<br>Czech Republic | To answer the question, “What is the role of ambulance EMS, EMS dispatch centres, paramedics and emergency medical physicians in the provision of palliative care to terminally ill patients”? | Scoping Literature Review                                                                                      | 31 Articles                               | Three EMS roles and one contextual factor were identified: 1) Providing complex care. 2) Adjusting patient’s trajectory. 3) Being able to make decisions in a time and information limited environment. 4) Health care professionals are insufficiently supported in palliative care.                                                                                                          | Selected articles limited to English and German. Some relevant articles potentially omitted.         |

|                                     |                                                                                                                                                                                                                                                                                                                          |                                    |                                |                                                                                                                                                                                                                                                                                                                                                                                                |                                                                     |
|-------------------------------------|--------------------------------------------------------------------------------------------------------------------------------------------------------------------------------------------------------------------------------------------------------------------------------------------------------------------------|------------------------------------|--------------------------------|------------------------------------------------------------------------------------------------------------------------------------------------------------------------------------------------------------------------------------------------------------------------------------------------------------------------------------------------------------------------------------------------|---------------------------------------------------------------------|
| Rogers, et al.<br>2015<br>Australia | <i>“To identify and measure paramedics’ perspectives and educational needs regarding palliative care provision, as well as their understanding of the common causes of death”.</i>                                                                                                                                       | Mixed Methods Survey               | 29 Paramedics                  | Paramedics have a good understanding of palliative care. They particularly identified terminal cancer as requiring palliation. Paramedic education is needed in end-of-life communication practices, ethical issues and illnesses requiring palliation.                                                                                                                                        | Low response rate. Possibility of self-selection and recall biases. |
| Rosa, et al.<br>2021<br>Canada      | <i>“To understand the current state of community paramedicine and palliative care”</i> in Canada.                                                                                                                                                                                                                        | Rapid Literature Review            | Unspecified Number of Articles | Expanded scope of community paramedic practice that provides palliative care has potential benefit in alleviating healthcare system strain while simultaneously improving patient outcomes. Pilot community paramedic palliative care programs in Canada have demonstrated the benefits of reduced emergency department visits and improved patient satisfaction with community paramedic use. | Small sample. Lack of quality appraisal.                            |
| Stone, et al.<br>2009<br>USA        | <i>“To ascertain paramedics’ attitudes and beliefs about end-of-life decision-making; To measure the frequency with which practicing paramedics encounter various end-of-life situations...and the importance they assign to them; To assess the extent to which paramedics report they were trained to address end-</i> | Descriptive Cross-Sectional Survey | 235 Paramedics                 | Participants perceived end-of-life issues as important, however, they did not feel adequately trained for these situations. Most (95%) agreed that paramedics should honour advance directives. Over half (59%) felt that paramedics should honour verbal wishes to limit on-scene resuscitation. Most (95%) had previously questioned intervention appropriateness in                         | Small sample size. Possibility of self-selection and recall biases. |

|                                 |                                                                                                                                                                                                                                       |                      |                                       |                                                                                                                                                                                                                                                                                                                                                                                                                                                                                     |                                                                                                                                       |
|---------------------------------|---------------------------------------------------------------------------------------------------------------------------------------------------------------------------------------------------------------------------------------|----------------------|---------------------------------------|-------------------------------------------------------------------------------------------------------------------------------------------------------------------------------------------------------------------------------------------------------------------------------------------------------------------------------------------------------------------------------------------------------------------------------------------------------------------------------------|---------------------------------------------------------------------------------------------------------------------------------------|
|                                 | <i>of-life situations; To compare the importance paramedics place on end-of life issues”.</i>                                                                                                                                         |                      |                                       | terminal patients. Some (26%) reported using personal judgement to withhold or terminate resuscitation in a terminal patient.                                                                                                                                                                                                                                                                                                                                                       |                                                                                                                                       |
| Surakka, et al. 2020<br>Finland | To answer the questions, “What is the frequency, reasons and timing of paramedic visits via the end-of-life protocol and do these visits differ between the areas with and without around the clock (24/7) palliative care services”? | Retrospective Cohort | 252 Patients,<br>306 Paramedic Visits | Most frequent reasons for paramedic visits were symptom control (38%) and transportation (29%). Paramedics visited 43% and 70% of the patients in areas with and without 24/7 palliative home care services, respectively. Over half (58%) of all paramedic visits were done outside office hours. Integration of paramedics into end-of-life care at home is reasonable particularly in rural areas without around the clock palliative care services and outside of office hours. | Efficacy of paramedic management and patient/family perceptions not assessed.                                                         |
| Surakka, et al. 2022<br>Finland | “To describe experiences and educational needs of the paramedics included in the end-of-life care protocol.”                                                                                                                          | Mixed Methods Survey | 192 Paramedics                        | Over 80% of paramedics agreed the protocol helped with care for patients with palliative needs and improved EoL care quality. Patient visits were considered useful (76.5%) and EoL care meaningful (62.5%) by paramedics who expressed challenges in psychosocial aspects, communication, symptom management, and their role in EoL care. They identified symptom management                                                                                                       | Some respondents (28%) were inexperienced with the protocol. Potential for self-section and recall biases. Limited external validity. |

|                                        |                                                                                                                                                                                                                               |                                                                                                    |                                                                                                                                                                     |                                                                                                                                                                                                                                                                                                                                                                                                                          |                                                                                                                                                    |
|----------------------------------------|-------------------------------------------------------------------------------------------------------------------------------------------------------------------------------------------------------------------------------|----------------------------------------------------------------------------------------------------|---------------------------------------------------------------------------------------------------------------------------------------------------------------------|--------------------------------------------------------------------------------------------------------------------------------------------------------------------------------------------------------------------------------------------------------------------------------------------------------------------------------------------------------------------------------------------------------------------------|----------------------------------------------------------------------------------------------------------------------------------------------------|
|                                        |                                                                                                                                                                                                                               |                                                                                                    |                                                                                                                                                                     | and communication as areas for education.                                                                                                                                                                                                                                                                                                                                                                                |                                                                                                                                                    |
| Swetenham, et al.<br>2013<br>Australia | <i>"To explore the introduction of a rapid response team as outlined in the South Australian Palliative Care Services Plan 2009–2016".</i>                                                                                    | Mixed Methods:<br>Call Log<br>Data, Patient<br>Records,<br>Surveys and<br>Individual<br>Interviews | 40 Patients<br>attended by<br>extended<br>care<br>paramedics,<br>24 Carer<br>Interviews, 2<br>Patient<br>Interviews,<br>22 Extended<br>Care<br>Paramedic<br>Surveys | During the study period there were 40 paramedic visits. Of these, 90% received an after-hours visit and remained at their site of care; 5% attended an emergency department and 5% were directly admitted to hospice. Paramedics found palliative care rewarding and contributory towards job satisfaction, however, also demanding. Paramedics appreciated the specialist palliative care service's telephonic support. | Methodology lacking adequate description. Qualitative data without thematic analysis.                                                              |
| Taghavi, et al.<br>2011<br>Germany     | <i>"To determine paramedics' practices in regard to withholding and terminating resuscitation, as well as to examine reports of their practical experiences with advance directives and special palliative crisis cards".</i> | Prospective<br>Self-<br>Administered<br>Survey                                                     | 728<br>Paramedics                                                                                                                                                   | End-of-life decision-making is challenging for paramedics. Guidelines for these situations are desired. Advance directives should be legally reinforced. Education in palliative care a need for paramedics.                                                                                                                                                                                                             | No comparison of respondents vs. non-respondents – possibility of self-selection bias exists. Questionnaire was self-administered and unvalidated. |
| Waldrop, et al.<br>2014<br>USA         | <i>"To identify how a sample of prehospital providers learned about EOL care, their perceived confidence with and perspectives on improved preparation for such calls".</i>                                                   | Mixed<br>Methods<br>Cross-<br>Sectional<br>Survey                                                  | 178<br>Prehospital<br>Providers                                                                                                                                     | Key themes: 1) Prehospital provider education. 2) Public education. 3) Educating health care providers on scope of practice. 4) Conflict resolution skills. 5) handling emotional families. 6) Clarification of transfer protocols. Majority of paramedics received formal training on DNR orders (92%) and MOLST (72%). Majority of                                                                                     | Small sample size. Limited external validity.                                                                                                      |

1  
2  
3  
4  
5  
6  
7  
8  
9  
10  
11  
12  
13  
14  
15  
16  
17  
18  
19  
20  
21  
22  
23  
24  
25  
26  
27  
28  
29  
30  
31  
32  
33  
34  
35  
36  
37  
38  
39  
40  
41  
42  
43  
44  
45  
46

|                          |                                                                                                                                                                                                                                               |                                          |                           |                                                                                                                                                                                                                                                                                                                                                              |                                                                                                                                                           |
|--------------------------|-----------------------------------------------------------------------------------------------------------------------------------------------------------------------------------------------------------------------------------------------|------------------------------------------|---------------------------|--------------------------------------------------------------------------------------------------------------------------------------------------------------------------------------------------------------------------------------------------------------------------------------------------------------------------------------------------------------|-----------------------------------------------------------------------------------------------------------------------------------------------------------|
|                          |                                                                                                                                                                                                                                               |                                          |                           | paramedics confident in ability to uphold DNR orders (87%) and resolve family conflict (87%).                                                                                                                                                                                                                                                                |                                                                                                                                                           |
| Waldrop, et al. 2015 USA | <i>“To explore prehospital providers’ perceptions of (1) the frequencies of different types of end-of life calls, (2) the signs and symptoms of dying in prehospital care, and (3) medical orders for life sustaining treatment (MOLST)”.</i> | Descriptive Cross-Sectional Pilot Survey | 178 Prehospital Providers | Calls to nursing homes and dying patients were frequent. MOLST documentation was infrequently encountered. There is synergy between prehospital and palliative medicine, however, further research is needed to develop prehospital end-of-life decision-making and understand how prehospital providers operate when confronted with palliative situations. | Open to participant information recall bias and perceptions. Convenience sampling at a single institution limiting external validity. Unvalidated survey. |
| Waldrop, et al. 2019 USA | <i>“To explore prehospital providers’ perspectives on how the awareness of dying and documentation of preferences influence decision-making on emergency calls near the end of life”.</i>                                                     | Qualitative Individual Interviews        | 43 EMS Providers          | Key themes: 1) Aware of Dying-Wishes are Documented. 2) Aware of Dying—Wishes are Undocumented. 3) Unaware of Dying-Wishes are Documented. 4) Unaware of Dying Wishes are Undocumented. 5) Discordance. EMS providers are well aware of the impact of their decisions at the end of life. EMS providers play a critical role at the end of life.             | Possibility of self-selection and recall biases. Limited external validity.                                                                               |
| Waldrop, et al. 2018 USA | <i>“To investigate prehospital providers’ perceptions of emergency calls at life’s end.”</i>                                                                                                                                                  | Qualitative Individual Interviews        | 43 EMS Providers          | Key themes: 1) Care crises. 2) Dying-related turmoil. 3) Staffing ratios. 4) Organizational protocols. EMS providers become mediators between nursing homes and emergency                                                                                                                                                                                    | Possibility of self-selection and recall biases. Limited external validity.                                                                               |

|                                  |                                                                                                                                                                                                                   |                                                     |                   |                                                                                                                                                                                                                                                                                                                                                                                                                                             |                                                                                                                                  |
|----------------------------------|-------------------------------------------------------------------------------------------------------------------------------------------------------------------------------------------------------------------|-----------------------------------------------------|-------------------|---------------------------------------------------------------------------------------------------------------------------------------------------------------------------------------------------------------------------------------------------------------------------------------------------------------------------------------------------------------------------------------------------------------------------------------------|----------------------------------------------------------------------------------------------------------------------------------|
|                                  |                                                                                                                                                                                                                   |                                                     |                   | departments by handling tension, conflict and challenges in patient management.                                                                                                                                                                                                                                                                                                                                                             |                                                                                                                                  |
| Waldrop, et al.<br>2015<br>USA   | <i>"To explore and describe how prehospital providers assess and manage end-of-life emergency calls".</i>                                                                                                         | Qualitative Individual Interviews                   | 43 EMS Providers  | Key themes: multifocal assessment involving family, patient and surroundings, emotional family responses, conflict between family, patient and practitioner and management of the dying process. Results suggest need for increased ability of prehospital providers to uphold advance directives and patient wishes at end of life.                                                                                                        | Possibility of self-selection and recall biases. Limited external validity.                                                      |
| Wenger, et al.<br>2022<br>USA    | <i>"To survey the state of Michigan's EMS providers regarding encounters with hospice patients to better understand challenges caring for this population and to identify any need for additional education."</i> | Self-Administered Survey                            | 706 EMS Providers | Most EMS providers (96%) had at least one encounter with a hospice patient. Only 24% had received formal education in this area. Most (86%) indicated interest in this training. Identified challenges included inaccessible advance directives (72%), pressure from family for aggressive treatment (61%), and difficulty contacting hospice personnel (48%). Empowering EMS providers with training in these areas would bridge the gaps. | Possibility of self-selection and recall biases. Questionnaire was self-administered and unvalidated. Limited external validity. |
| Wiese, et al.<br>2013<br>Germany | <i>"To determine international recommendations for the treatment and prevention of palliative emergencies".</i>                                                                                                   | Mixed Methods: Prospective Self-Administered Survey | 92 Experts        | Four standards in the management of palliative emergencies were recommended: 1) Early integration of "Palliative Care Teams" and basic outpatient                                                                                                                                                                                                                                                                                           | Possibility of self-selection bias. Limited external validity. Unvalidated survey.                                               |

|                               |                                                                                                                                                                                                                                             |                                      |                          |                                                                                                                                                                                                                                                         |                                                                                                       |
|-------------------------------|---------------------------------------------------------------------------------------------------------------------------------------------------------------------------------------------------------------------------------------------|--------------------------------------|--------------------------|---------------------------------------------------------------------------------------------------------------------------------------------------------------------------------------------------------------------------------------------------------|-------------------------------------------------------------------------------------------------------|
|                               |                                                                                                                                                                                                                                             |                                      |                          | palliative care systems. 2) End-of-life discussions. 3) Defined emergency medical documents, drug boxes, and "Do not attempt resuscitation" orders. 4) Emergency medical training for physicians and paramedics.                                        |                                                                                                       |
| Wiese, et al. 2012<br>Germany | <i>"To determine paramedics' understanding of their role in withholding or withdrawing resuscitation/EoL-treatment of palliative care patients when an advance directive is present"</i> .                                                  | Prospective Self-Administered Survey | 728 Paramedics           | Majority of paramedics (71%) have dealt with palliative emergencies. Improved training and guidelines for paramedics are necessary. Ethical and legal obligations may conflict for paramedics faced with palliative emergencies.                        | Possibility of self-selection and recall biases. Questionnaire was self-administered and unvalidated. |
| Wiese, et al. 2010<br>Germany | <i>"To provide information about the strategic and therapeutic approach employed by EMTs in outpatient palliative care patients in cardiac arrest"</i> .                                                                                    | Retrospective Cohort                 | 88 Patient Records       | Approaches to prehospital palliative patients with cardiac arrest differ based upon EMS provider qualification. Many resuscitations are initiated contrary to patient wishes due to lack of advance directives. These should be more readily available. | Small sample size. Limited external validity.                                                         |
| Wiese, et al. 2009<br>Germany | <i>"To show the importance of palliative medical care competence in the pre-hospital emergency medical care of patients with advanced cancer diseases [and] to describe basic approaches to improve the current situation in Germany"</i> . | Prospective Cohort                   | 361 Emergency Calls      | Prehospital palliative care improves when prehospital physicians have palliative care expertise. Prehospital palliative care education is recommended.                                                                                                  | Limited external validity.                                                                            |
| Wiese, et al. 2009<br>Germany | To interview prehospital emergency physicians (EP) <i>"about their knowledge of</i>                                                                                                                                                         | Retrospective Self-                  | 104 Emergency Physicians | Most participants (89%) had been confronted with palliative emergencies and expressed                                                                                                                                                                   | Possibility of self-selection and recall biases. Questionnaire was self-                              |

|                               |                                                                                                                                                                                                                              |                      |                          |                                                                                                                                                                                                                                       |                                               |
|-------------------------------|------------------------------------------------------------------------------------------------------------------------------------------------------------------------------------------------------------------------------|----------------------|--------------------------|---------------------------------------------------------------------------------------------------------------------------------------------------------------------------------------------------------------------------------------|-----------------------------------------------|
|                               | <i>palliative care, about their experiences in dealing with palliative care patients in out-of-hospital emergency situations and about their beliefs and interests in palliative care”.</i>                                  | Administered Survey  |                          | uncertainties in managing these situations. Psychosocial and social care represented frequent challenges. Most participants (80%) were interested in further palliative care training.                                                | administered and unvalidated.                 |
| Wiese, et al. 2009<br>Germany | To investigate and compare “ <i>the emergency medical treatment of acute dyspnoea in palliative care patients affected by advanced (palliative) stages of cancer disease on basis of emergency medical therapy schemes”.</i> | Retrospective Cohort | 116 Patient Care Records | Significant relief of acute dyspnoea when using opioids compared to standard treatment. This should be included in emergency physician training. Most emergency physicians (>70%) were uncertain about palliative patient management. | Small sample size. Limited external validity. |



1  
2  
3  
4  
5  
6  
7  
8  
9  
10  
11  
12  
13  
14  
15  
16  
17  
18  
19  
20  
21  
22  
23  
24  
25  
26  
27  
28  
29  
30  
31  
32  
33  
34  
35  
36  
37  
38  
39  
40  
41  
42  
43  
44  
45  
46  
47  
48  
49  
50  
51  
52  
53  
54  
55  
56  
57  
58  
59  
60

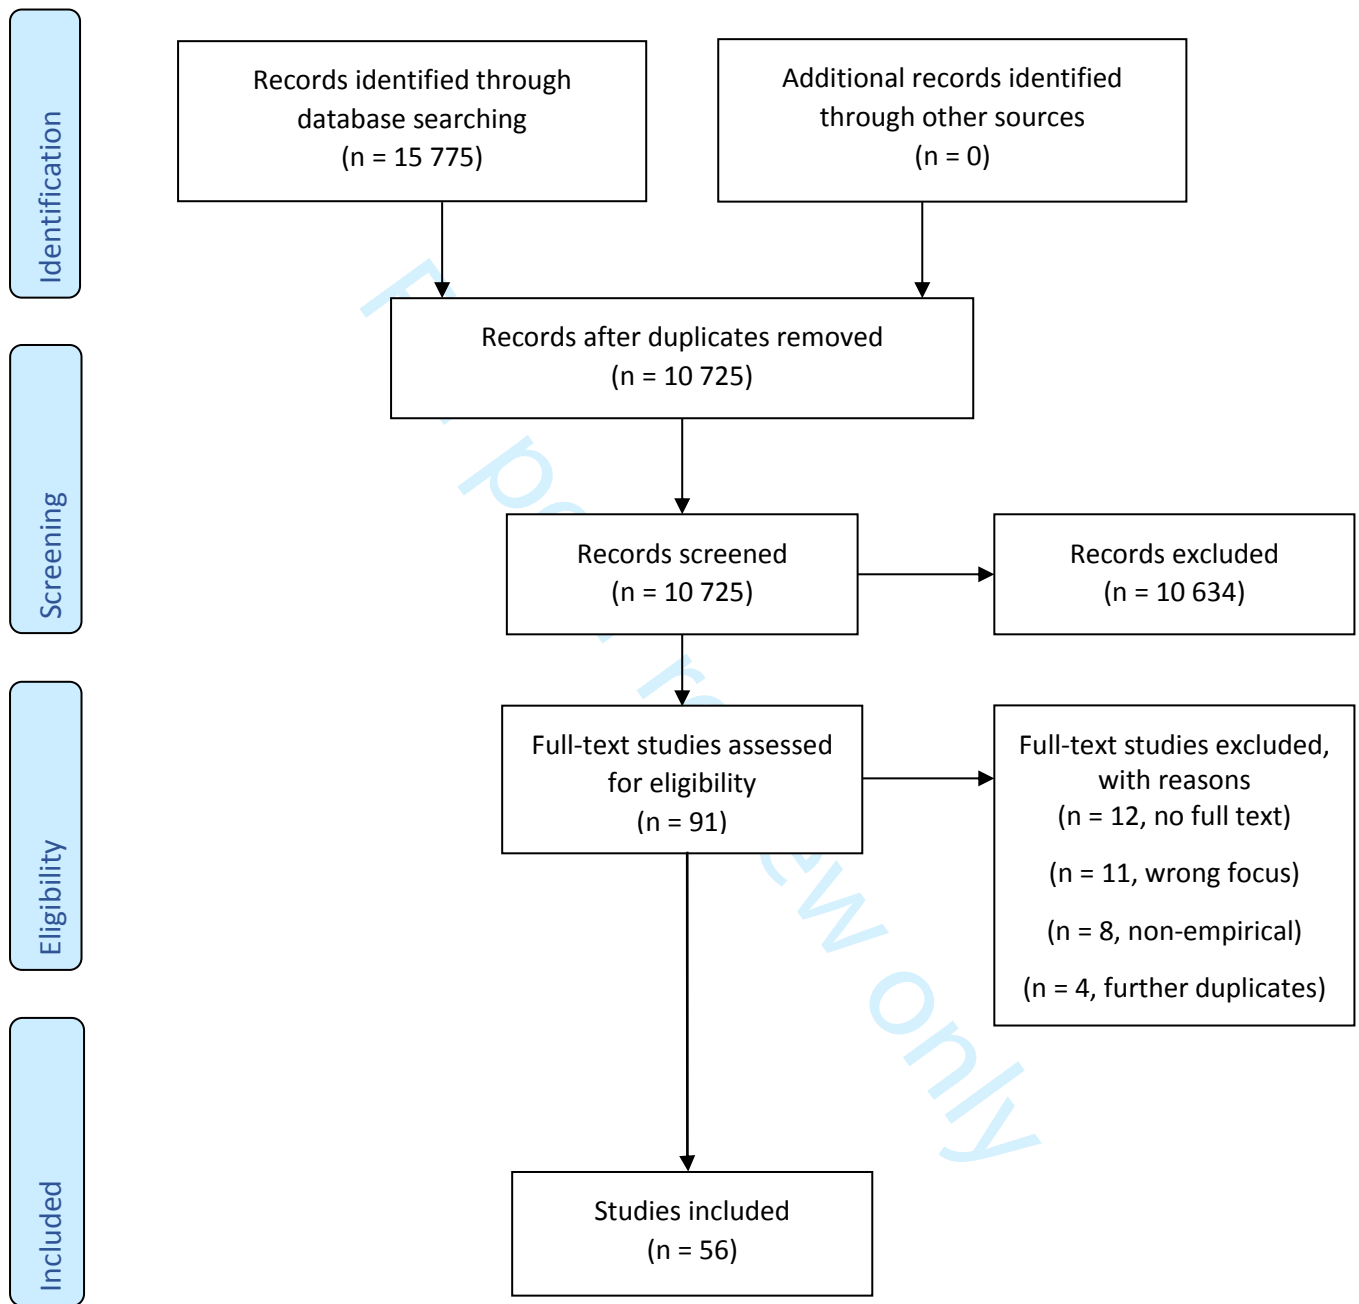

## Preferred Reporting Items for Systematic reviews and Meta-Analyses extension for Scoping Reviews (PRISMA-ScR) Checklist

| SECTION                                               | ITEM | PRISMA-ScR CHECKLIST ITEM                                                                                                                                                                                                                                                                                  | REPORTED ON PAGE # |
|-------------------------------------------------------|------|------------------------------------------------------------------------------------------------------------------------------------------------------------------------------------------------------------------------------------------------------------------------------------------------------------|--------------------|
| <b>TITLE</b>                                          |      |                                                                                                                                                                                                                                                                                                            |                    |
| Title                                                 | 1    | Identify the report as a scoping review.                                                                                                                                                                                                                                                                   |                    |
| <b>ABSTRACT</b>                                       |      |                                                                                                                                                                                                                                                                                                            |                    |
| Structured summary                                    | 2    | Provide a structured summary that includes (as applicable): background, objectives, eligibility criteria, sources of evidence, charting methods, results, and conclusions that relate to the review questions and objectives.                                                                              |                    |
| <b>INTRODUCTION</b>                                   |      |                                                                                                                                                                                                                                                                                                            |                    |
| Rationale                                             | 3    | Describe the rationale for the review in the context of what is already known. Explain why the review questions/objectives lend themselves to a scoping review approach.                                                                                                                                   |                    |
| Objectives                                            | 4    | Provide an explicit statement of the questions and objectives being addressed with reference to their key elements (e.g., population or participants, concepts, and context) or other relevant key elements used to conceptualize the review questions and/or objectives.                                  |                    |
| <b>METHODS</b>                                        |      |                                                                                                                                                                                                                                                                                                            |                    |
| Protocol and registration                             | 5    | Indicate whether a review protocol exists; state if and where it can be accessed (e.g., a Web address); and if available, provide registration information, including the registration number.                                                                                                             |                    |
| Eligibility criteria                                  | 6    | Specify characteristics of the sources of evidence used as eligibility criteria (e.g., years considered, language, and publication status), and provide a rationale.                                                                                                                                       |                    |
| Information sources*                                  | 7    | Describe all information sources in the search (e.g., databases with dates of coverage and contact with authors to identify additional sources), as well as the date the most recent search was executed.                                                                                                  |                    |
| Search                                                | 8    | Present the full electronic search strategy for at least 1 database, including any limits used, such that it could be repeated.                                                                                                                                                                            |                    |
| Selection of sources of evidence†                     | 9    | State the process for selecting sources of evidence (i.e., screening and eligibility) included in the scoping review.                                                                                                                                                                                      |                    |
| Data charting process‡                                | 10   | Describe the methods of charting data from the included sources of evidence (e.g., calibrated forms or forms that have been tested by the team before their use, and whether data charting was done independently or in duplicate) and any processes for obtaining and confirming data from investigators. |                    |
| Data items                                            | 11   | List and define all variables for which data were sought and any assumptions and simplifications made.                                                                                                                                                                                                     |                    |
| Critical appraisal of individual sources of evidence§ | 12   | If done, provide a rationale for conducting a critical appraisal of included sources of evidence; describe the methods used and how this information was used in any data synthesis (if appropriate).                                                                                                      |                    |
| Synthesis of results                                  | 13   | Describe the methods of handling and summarizing the data that were charted.                                                                                                                                                                                                                               |                    |

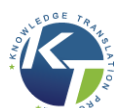

| SECTION                                       | ITEM | PRISMA-ScR CHECKLIST ITEM                                                                                                                                                                       | REPORTED ON PAGE # |
|-----------------------------------------------|------|-------------------------------------------------------------------------------------------------------------------------------------------------------------------------------------------------|--------------------|
| <b>RESULTS</b>                                |      |                                                                                                                                                                                                 |                    |
| Selection of sources of evidence              | 14   | Give numbers of sources of evidence screened, assessed for eligibility, and included in the review, with reasons for exclusions at each stage, ideally using a flow diagram.                    |                    |
| Characteristics of sources of evidence        | 15   | For each source of evidence, present characteristics for which data were charted and provide the citations.                                                                                     |                    |
| Critical appraisal within sources of evidence | 16   | If done, present data on critical appraisal of included sources of evidence (see item 12).                                                                                                      |                    |
| Results of individual sources of evidence     | 17   | For each included source of evidence, present the relevant data that were charted that relate to the review questions and objectives.                                                           |                    |
| Synthesis of results                          | 18   | Summarize and/or present the charting results as they relate to the review questions and objectives.                                                                                            |                    |
| <b>DISCUSSION</b>                             |      |                                                                                                                                                                                                 |                    |
| Summary of evidence                           | 19   | Summarize the main results (including an overview of concepts, themes, and types of evidence available), link to the review questions and objectives, and consider the relevance to key groups. |                    |
| Limitations                                   | 20   | Discuss the limitations of the scoping review process.                                                                                                                                          |                    |
| Conclusions                                   | 21   | Provide a general interpretation of the results with respect to the review questions and objectives, as well as potential implications and/or next steps.                                       |                    |
| <b>FUNDING</b>                                |      |                                                                                                                                                                                                 |                    |
| Funding                                       | 22   | Describe sources of funding for the included sources of evidence, as well as sources of funding for the scoping review. Describe the role of the funders of the scoping review.                 |                    |

JBI = Joanna Briggs Institute; PRISMA-ScR = Preferred Reporting Items for Systematic reviews and Meta-Analyses extension for Scoping Reviews.

\* Where *sources of evidence* (see second footnote) are compiled from, such as bibliographic databases, social media platforms, and Web sites.

† A more inclusive/heterogeneous term used to account for the different types of evidence or data sources (e.g., quantitative and/or qualitative research, expert opinion, and policy documents) that may be eligible in a scoping review as opposed to only studies. This is not to be confused with *information sources* (see first footnote).

‡ The frameworks by Arksey and O'Malley (6) and Levac and colleagues (7) and the JBI guidance (4, 5) refer to the process of data extraction in a scoping review as data charting.

§ The process of systematically examining research evidence to assess its validity, results, and relevance before using it to inform a decision. This term is used for items 12 and 19 instead of "risk of bias" (which is more applicable to systematic reviews of interventions) to include and acknowledge the various sources of evidence that may be used in a scoping review (e.g., quantitative and/or qualitative research, expert opinion, and policy document).

From: Tricco AC, Lillie E, Zarin W, O'Brien KK, Colquhoun H, Levac D, et al. PRISMA Extension for Scoping Reviews (PRISMA-ScR): Checklist and Explanation. *Ann Intern Med.* 2018;169:467–473. doi: 10.7326/M18-0850.

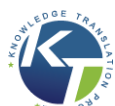

# BMJ Open

## Emergency Medical Services and Palliative Care: A Scoping Review

|                                 |                                                                                                                                                                                                                                                                                                                                                                                                                       |
|---------------------------------|-----------------------------------------------------------------------------------------------------------------------------------------------------------------------------------------------------------------------------------------------------------------------------------------------------------------------------------------------------------------------------------------------------------------------|
| Journal:                        | <i>BMJ Open</i>                                                                                                                                                                                                                                                                                                                                                                                                       |
| Manuscript ID                   | bmjopen-2022-071116.R1                                                                                                                                                                                                                                                                                                                                                                                                |
| Article Type:                   | Original research                                                                                                                                                                                                                                                                                                                                                                                                     |
| Date Submitted by the Author:   | 14-Feb-2023                                                                                                                                                                                                                                                                                                                                                                                                           |
| Complete List of Authors:       | Gage, Caleb; University of Cape Town Faculty of Health Sciences, Division of Emergency Medicine<br>Stander, Charnelle; University of Cape Town Faculty of Health Sciences, Division of Emergency Medicine<br>Gwyther, Liz; University of Cape Town Faculty of Health Sciences, Division of Interdisciplinary Palliative Care and Medicine<br>Stassen, Willem; University of Cape Town, Division of Emergency Medicine |
| <b>Primary Subject Heading</b>: | Palliative care                                                                                                                                                                                                                                                                                                                                                                                                       |
| Secondary Subject Heading:      | Emergency medicine                                                                                                                                                                                                                                                                                                                                                                                                    |
| Keywords:                       | ACCIDENT & EMERGENCY MEDICINE, HEALTH SERVICES ADMINISTRATION & MANAGEMENT, PALLIATIVE CARE                                                                                                                                                                                                                                                                                                                           |
|                                 |                                                                                                                                                                                                                                                                                                                                                                                                                       |

SCHOLARONE™  
Manuscripts



I, the Submitting Author has the right to grant and does grant on behalf of all authors of the Work (as defined in the below author licence), an exclusive licence and/or a non-exclusive licence for contributions from authors who are: i) UK Crown employees; ii) where BMJ has agreed a CC-BY licence shall apply, and/or iii) in accordance with the terms applicable for US Federal Government officers or employees acting as part of their official duties; on a worldwide, perpetual, irrevocable, royalty-free basis to BMJ Publishing Group Ltd ("BMJ") its licensees and where the relevant Journal is co-owned by BMJ to the co-owners of the Journal, to publish the Work in this journal and any other BMJ products and to exploit all rights, as set out in our [licence](#).

The Submitting Author accepts and understands that any supply made under these terms is made by BMJ to the Submitting Author unless you are acting as an employee on behalf of your employer or a postgraduate student of an affiliated institution which is paying any applicable article publishing charge ("APC") for Open Access articles. Where the Submitting Author wishes to make the Work available on an Open Access basis (and intends to pay the relevant APC), the terms of reuse of such Open Access shall be governed by a Creative Commons licence – details of these licences and which [Creative Commons](#) licence will apply to this Work are set out in our licence referred to above.

Other than as permitted in any relevant BMJ Author's Self Archiving Policies, I confirm this Work has not been accepted for publication elsewhere, is not being considered for publication elsewhere and does not duplicate material already published. I confirm all authors consent to publication of this Work and authorise the granting of this licence.

# Emergency Medical Services and Palliative Care: A Scoping Review

**Authors:** Caleb Hanson Gage<sup>a</sup>, Charnelle Stander<sup>a</sup>, Liz Gwyther<sup>b</sup>, Willem Stassen<sup>a</sup>

<sup>a</sup> Division of Emergency Medicine, University of Cape Town, Cape Town, South Africa.

<sup>b</sup> Division of Interdisciplinary Palliative Care and Medicine, University of Cape Town, Cape Town, South Africa.

**Corresponding Author:** Caleb Hanson Gage. Division of Emergency Medicine, University of Cape Town, Cape Town 7935, South Africa. +27 83 799 4357, caleb.gage@gmail.com

**Word Count:** 4055

peer review only

## ABSTRACT

**Objectives** The aim of this study was to map existing Emergency Medical Services and palliative care literature by answering the question, what literature exists concerning EMS and palliative care? The sub-questions regarding this literature were, 1) what types of literature exist, 2) what are the key findings and 3) what knowledge gaps are present?

**Design** A scoping review of literature was performed with an *a priori* search strategy.

**Data sources** MEDLINE via Pubmed, Web of Science, CINAHL, Embase via Scopus, PsycINFO, the University of Cape Town Thesis Repository and Google Scholar were searched.

**Eligibility criteria for selecting studies** Empirical, English studies involving human populations published between 1 January 2000 and 24 November 2022 concerning EMS and palliative care were included.

**Data extraction and synthesis** Two independent reviewers screened titles, abstracts and full texts for inclusion. Extracted data underwent descriptive content analysis and was reported according to the PRISMA-ScR guidelines.

**Results:** In total, 10 725 articles were identified. Following title and abstract screening, 10 634 studies were excluded. A further 35 studies were excluded upon full text screening. The remaining 56 articles were included for review. Four predominant domains arose from included studies: 1) EMS' palliative care role, 2) Challenges faced by EMS in palliative situations, 3) EMS and palliative care integration benefits, 4) Proposed recommendations for EMS and palliative care integration.

**Conclusion:** EMS have a role to play in out-of-hospital palliative care, however, many challenges must be overcome. EMS provider education, collaboration between EMS and palliative systems, creation of EMS palliative care guidelines/protocols, creation of specialised out-of-hospital palliative care teams and further research have been recommended as solutions. Future research should focus on the prioritization, implementation, and effectiveness of these solutions in various contexts.

1  
2  
3 **Key Words:** Emergency Medical Services, Palliative Care  
4  
5

6  
7 **ARTICLE SUMMARY**  
8

9 Strengths and Limitations of This Study  
10

- 11
- 12 • A thorough search string was piloted and employed in conjunction with a wide  
13 range of databases, meeting recommendations for optimal combinations, and  
14 providing a comprehensive view of contemporary literature.  
15
  - 16 • The performance and report of this review was completed according to the  
17 quality standards of the PRISMA-ScR guidelines.  
18
  - 19 • Limitations to this review include those common to scoping reviews such as  
20 human error in article selection.  
21
  - 22 • A formal risk of bias assessment was not performed; therefore, data reliability  
23 lacks evaluation.  
24  
25  
26  
27  
28  
29  
30  
31  
32  
33  
34  
35  
36  
37  
38  
39  
40  
41  
42  
43  
44  
45  
46  
47  
48  
49  
50  
51  
52  
53  
54  
55  
56  
57  
58  
59  
60



## INTRODUCTION

Emergency Medical Services (EMS) and palliative care function with unique respective aims. EMS are designed to preserve life and limb in out-of-hospital emergency situations by immediate intervention and hospital conveyance(1,2).

Palliative care is, according to the World Health Organization (WHO), *'an approach that improves the quality of life (QoL) of patients and their families facing the problem associated with life-threatening illness, through the prevention and relief of suffering by means of early identification and impeccable assessment and treatment of pain and other problems, physical, psychosocial and spiritual.'*(3) This includes a variety of situations such as chronic/life-limiting illnesses, end-of-life (EoL) care and any condition (physical, psychosocial, spiritual) causing suffering.(3) Thus, the EMS approach is curative, whereas the palliative approach is supportive.

Despite these seemingly conflicting approaches, EMS and palliative care often intersect.(4–7) As they progress towards EoL, patients with palliative needs experience worsening symptoms for which EMS are often contacted.(8,9)

Furthermore, the role of EMS has expanded in recent years to include more intricate forms of healthcare beyond emergency care such as community-based primary care and palliative care.(10) Global ageing populations and subsequent increases in chronic non-communicable diseases are well documented reasons for this expanded role as demand for palliative care rises and EMS are more frequently confronted with these patients.(11)

Contemporary EMS and palliative care literature recommends integration between the two fields to improve palliative care provision as their differing aims may, in fact, complement one another.(12) Nevertheless, a lack of integration persists. Typically, EMS are not trained in palliative care nor do palliative care systems make formal use of EMS to deliver care.(13) This results in disregarding of patient autonomy, performance of aggressive, futile interventions and overall poor management of those requiring a palliative approach to care by EMS providers.(12–14) However, should the two fields integrate, potential benefits include early palliative care delivery, provision of homecare, respect for patient autonomy, improved patient and family satisfaction, confidence, and quality of life (QoL), decreased health care costs and setting correct trajectories of care.(5, 15, 16)

1  
2  
3 Given the growing body of EMS and palliative care literature, and potential  
4 integration benefits, a need exists to review current evidence. Previous reviews have  
5 focussed on singular aspects such as specialised community paramedic roles in the  
6 provision of palliative care in patient homes (11), however, a more extensive review  
7 of EMS in the broader out-of-hospital setting is lacking. Thus, this review aimed to  
8 map existing EMS and palliative care literature by answering the question, what  
9 literature exists concerning EMS and palliative care? The sub-questions regarding  
10 this literature were, (i) what types of literature exist, (ii) what are the key findings and  
11 (iii) what knowledge gaps are present? For the purposes of this study, EMS are  
12 defined as those systems and personnel providing medical care in the out-of-hospital  
13 setting using ambulance-based services. The out-of-hospital setting includes all  
14 areas to which EMS may be called, from patient homes to any public space.  
15  
16  
17  
18  
19  
20  
21  
22  
23  
24  
25  
26

## 27 **METHODS**

### 28 *Design*

29  
30  
31 A scoping review of EMS and palliative care literature was performed, the protocol  
32 for which has been published previously,(17) detailing the methodological framework  
33 of Arksey and O'Malley used for this review.(18) The steps of this employed  
34 framework were (i) identifying the research question, (ii) identifying relevant studies,  
35 (iii) selecting eligible studies, (iv) charting data, (v) collating, summarising and  
36 reporting results.(18) The optional sixth step of expert consultation was not included  
37 as this review forms the first part of an overarching investigation in which expert  
38 consultation will be subsequently performed. As this review aimed to simply map  
39 existing literature, in-depth quality appraisal of eligible studies was not performed,  
40 though limitations were noted.  
41  
42  
43  
44  
45  
46  
47  
48  
49  
50  
51

### 52 *Search strategy and eligibility criteria*

53  
54 An *a priori* search strategy, developed in line with the recommendations of  
55 Aromataris and Riitano, was used.(19) This strategy employed key word  
56 combinations and their synonyms (See Supplementary Material 1). The following  
57 databases were originally searched on 28 September 2021 with an updated search  
58  
59  
60

1  
2  
3 on 24 November 2022: MEDLINE via Pubmed, Web of Science, CINAHL, Embase  
4 via Scopus and PsycINFO. The University of Cape Town (UCT) Thesis Repository  
5 and Google Scholar were searched to identify grey literature. These databases met  
6 the recommendation of Bramer, et al. for optimal database combinations.(20)  
7  
8 Furthermore, Embase, CINAHL and PsycINFO provided access to unique palliative  
9 care literature not indexed in MEDLINE as highlighted by Tieman, et al.(21)  
10  
11 Additional articles were sought from hand-searching reference lists of eligible  
12 studies. This search strategy was piloted to ensure appropriateness of key word  
13 combinations in the selected databases.  
14  
15  
16  
17  
18

19 Eligible studies were selected based on the following criteria:  
20

- 21 - Inclusion: Empirical, English studies involving human populations published  
22 between 1 January 2000 and 24 November 2022 concerning EMS and  
23 palliative care. The EMS and palliative care interface was the primary focus  
24 for eligibility.  
25
- 26 - Exclusion: Studies involving the in-hospital setting, including emergency  
27 departments (EDs), those where the full text was unobtainable, editorial and  
28 discussion articles, opinion papers and studies involving exclusively EMS or  
29 palliative care.  
30  
31  
32  
33  
34  
35  
36  
37  
38

### 39 *Data Management*

40  
41 All identified studies were uploaded to Mendeley reference software(22) and  
42 duplicates removed. Remaining studies were exported to the Rayyan web  
43 application(23) where two authors (CG, CS) independently screened titles and  
44 abstracts for inclusion. CG and CS then screened the full texts of included studies for  
45 final inclusion in the review. Agreement achieved between authors was >99%. Upon  
46 discussion, complete agreement was reached for all studies. This process was  
47 overseen by LG and WS. All authors agreed upon the final inclusion list.  
48  
49  
50  
51  
52  
53  
54  
55  
56  
57  
58  
59  
60

### *Data Extraction and Analysis*

An *a priori* data extraction matrix was used to gather the following data from each included study which were charted by CG using *Microsoft Word* (Microsoft Corporation, Redmond, Washington, U.S.A.): Title, authorship, publication year, setting, including country income status divided into high-income countries (HICs) and low-to-middle income countries (LMICs), aims, population and sample, EMS palliative care training, methodology, conclusions, significant findings, limitations. To ensure consistency in application of this extraction matrix, CS double coded 10% of included articles. In line with the recommendations of Arksey and O'Malley, extracted data underwent basic numerical analysis concerning the distribution of studies and descriptive content analysis where the literature was organized according to major domains.<sup>(18)</sup> These domains were identified through an inductive-dominant approach. Findings are presented in accordance with the Preferred Reporting Items for Systematic Reviews and Meta-Analyses extension for scoping reviews (PRISMA-ScR).<sup>(24,25)</sup>

### *Patient and Public Involvement*

No patients were involved in this study.

## **RESULTS**

After duplication removal, 10 725 studies were identified. Following title and abstract screening, 10 634 studies were excluded. A further 35 studies were excluded upon full text screening. Of the full text exclusions, 12 full texts were unavailable, the EMS and palliative care interface was not the primary focus in 11 studies, 8 studies presented non-empirical evidence and the remaining 4 studies were previously undetected duplicates. Hand-searching of included reference lists revealed no further studies. No grey literature fitting inclusion criteria was identified. In total, 56 studies were included for analysis. Figure 1 details the selection process while a summary of included studies is provided in Supplementary Material 2.

### *Study characteristics*

Included studies were performed in the United States of America (USA) (n=16),(1,6,26–39) the United Kingdom (UK) (n=9),(7,14,40–46) Germany (n=10),(8,47–55) Australia (n=8),(2,4,11,56–60) Canada (n=4),(15,61–63) France (n=1),(5) Switzerland (n=1),(13) New Zealand (n=2),(64,65) Finland (n=2),(66,67) Czech Republic (n=1),(68) Brazil (n=1)(69) and South Africa (n=1)(16) between 2002 and 2022. The majority of studies (96%, n=54) were performed in HICs with only Brazil and South Africa representing LMICs, and most (63%, n=35) were published between 2018 and 2022.

Methodologically, most studies were quantitative (55%, n=31) while the remainder used a qualitative (27%, n=15) or mixed-methods (18%, n=10) approach.

Quantitative studies comprised of surveys (n=12),(1,8,30,32,38,41,43,48,49,51,56,58) retrospective cohorts (n=9),(5,33,34,40,52,54,55,57,66) literature reviews (n=5),(11,46,61,64,68) case series/reports (n=3)(6,13,35), a pre- and post-intervention study (n=1)(29) and a prospective cohort (n=1).(8) Qualitative studies contained individual interviews (n=12),(7,14,16,26–28,31,42,44,47,65,69) focus group interviews (n=2),(2,63) and deliberative dialogues (n=1),(62) while the mixed-methods studies(4,15,36,37,39,45,50,59,60,67) made use of various survey and interview combinations.

EMS providers were the primary population in most studies (52%, n=29)(1,2,4,7,8,14,16,26–31,36–39,41,43–45,47–49,51,56,58,67,69) including paramedics, doctors and nurses involved in out-of-hospital emergency care dependant on EMS system model: paramedic-led (Anglo-American), physician-led (Franco-German).(11) Other investigations were performed using patient records (n=10),(5,8,33,34,40,52,54,55,57,66) published literature (n=5),(11,46,61,64,68) case reports/series (n=3),(6,13,35) stakeholders and experts (n=3),(42,50,62) mixed populations including patients, families, paramedics, caregivers, palliative providers and patient records (n=3),(15,59,63), EMS agencies (n=2)(32,60) and family caregivers (n=1).(65)

Study categories were EMS provider knowledge and perspectives (54%, n=30),(1,2,4,7,8,14,16,26–28,30,31,36–39,41–45,47–49,51,56,58,63,67,69) EMS-

1  
2  
3 palliative integration (23%, n=13),(5,6,15,29,32,34,35,40,50,59,60,62,66) EMS-  
4 palliative intersection (14%, n=8)(8,13,33,52,54,55,57,65) and literature reviews (9%,  
5 n=5).(11,46,61,64,68) Studies concerning EMS provider knowledge and  
6 perspectives *vis à vis* palliative care focussed on EMS management and decision-  
7 making (n=9),(8,26,27,37,44,48,49,51,58) roles and barriers in palliative situations  
8 (n=11),(2,14,16,28,31,42,43,45,47,63,69) understanding and education  
9 (n=6),(1,4,30,38,39,67) identification of patients with palliative needs (n=2),(36,41)  
10 and potential solutions to overcome barriers (n=2).(7,56) Studies concerning EMS  
11 and palliative care integration focussed on effects of integration on patient transport,  
12 patient/family satisfaction and EMS provider confidence (n=7),(5,15,34,35,40,59,66)  
13 recommendations for integration (n=4)(6,29,50,62) and EMS palliative care protocols  
14 (n=2).(32,60) Studies concerning EMS and palliative care intersection focussed on  
15 the characteristics and frequency of patients with palliative needs encountered by  
16 EMS providers (n=4),(8,33,55,57) EMS provider treatment of these patients  
17 (n=3)(13,52,54) and the experience of family caregivers.(65) Literature reviews  
18 focussed on attitudes and perceptions of paramedics concerning EoL care (n=1),(46)  
19 EMS role in EoL care (n=1),(68) EMS palliative provision in community-based  
20 settings(n=1)(11) and rapid reviews of EMS and palliative care literature in Canada  
21 (n=1)(61) and New Zealand (n=1).(64)

22  
23  
24  
25  
26  
27  
28  
29  
30  
31  
32  
33  
34  
35  
36  
37 Four predominant domains arose from included studies: 1) EMS' palliative care role,  
38 2) Challenges faced by EMS in palliative situations, 3) EMS and palliative care  
39 integration benefits, 4) Proposed recommendations for EMS and palliative care  
40 integration.  
41  
42  
43  
44  
45

#### 46 *EMS' palliative care role*

47  
48  
49 Numerous studies (66%, n=37)(1,2,6,8,11,14–16,26–28,31,34,35,37,41–  
50 46,48,51,53–55,57,59–61,63–69) discussed the potential role of EMS in palliative  
51 care. Most EMS providers viewed palliative care positively, regarding it as important  
52 to their role as demonstrated in studies performed in the UK,(43) Australia,(59)  
53 Canada,(15) and South Africa.(16) The EMS' palliative care role was frequently  
54 highlighted due to the intersection between EMS and patients with palliative  
55 needs.(8,54,57) For example, an Australian study found palliative situations  
56  
57  
58  
59  
60

1  
2  
3 comprised 0.5% (n=4348) of the annual EMS caseload.(57) Other studies, found  
4 palliative situations may represent up to 10% of caseload and most EMS providers  
5 had previously encountered palliative situations.(8,47) Commonly documented  
6 reasons for EMS calls to palliative situations were sudden, unexpected patient  
7 deterioration, caregiver exhaustion and alarming signs and symptoms: dyspnoea,  
8 pain, convulsions, severe anxiety.(15,26,47) These calls often occurred out-of-office  
9 hours or during holidays when the usual patient caregivers were unavailable.(13)  
10 Specific EMS palliative care roles included complex care provision,(68) adjusting  
11 patient trajectory,(16) decision-making within limited information environments,(14)  
12 therapeutic interventions,(54) 24/7 availability, provision of homecare,(66) and  
13 improving patient and family quality of life, comfort, and confidence.(15)  
14  
15  
16  
17  
18  
19  
20  
21  
22  
23  
24

### 25 *Challenges faced by EMS in palliative situations*

26  
27 Most studies (63%, n=35)(1,2,6–8,11,13,14,16,26,27,30–33,36–38,40,41,43–  
28 47,49,51–54,58,61,67–69) highlighted various challenges EMS providers face in  
29 palliative situations. These challenges were EMS provider mindset,(1) the out-of-  
30 hospital environment,(16) EMS systems,(14) lack of education,(68) medico-legal  
31 confusion,(49) and inter-personal conflicts.(2) The EMS provider mindset is to 'save  
32 lives' through a curative approach to care, whereas the palliative approach is  
33 primarily supportive through prevention and relief of suffering.(1–3) Other common  
34 challenges were related to the complex out-of-hospital environment: lack of  
35 information, limited time, consequent difficult decision-making.(47)  
36  
37  
38  
39  
40  
41  
42  
43

44 EMS system barriers to palliative provision were mandated hospital transport,(16)  
45 limited scope of practice(47) and lack of alternative care pathways.(14) Despite  
46 patient and family wishes and better clinical judgement, EMS providers often  
47 conveyed palliative patients to hospital due to system rigidity, fear of consequences  
48 and a lack of alternative care pathways.(14) Hospital transport was described as a  
49 safety net for EMS providers and, thus, their default decision in palliative situations.  
50  
51  
52  
53  
54 (44)

55  
56 Many studies identified a lack of EMS provider education concerning palliative  
57 care(2,16,36,43,47) and only five studies mentioned EMS providers with additional  
58 palliative or hospice care training in their samples.(4,8,36,53,56) The additional  
59  
60

1  
2  
3 palliative training ranged from short course to post-graduate diploma level. This lack  
4 of education was identified in both physician and paramedic-led EMS systems.(8,16)

5  
6  
7 Highlighted medico-legal challenges for EMS providers in palliative situations were  
8 fear of litigation(47) and confusion surrounding legal documentation such as  
9 advance directives (ADs).(13,38,49). EMS providers were sometimes unaware of the  
10 presence of legal documentation due to lack of available information at  
11 incidents.(6,26,27) Furthermore, where legal documentation was presented, EMS  
12 providers were uncertain of legal implications in emergencies.(2,49)

13  
14  
15 Finally, EMS providers described various conflicts requiring management in palliative  
16 situations. Conflicts arose with other health care providers, patients, families and  
17 within EMS providers themselves.(2) These conflicts were due to competing  
18 interests: patient wishes, family wishes, EMS protocols, EMS provider clinical  
19 judgement, medico-legal considerations.(16,26)

### 20 21 22 *EMS and palliative care integration benefits*

23  
24  
25 Many studies (36%, n=20)(5,6,8,11,15,16,29,34,35,40–42,47,53,54,59,61–63,66)  
26 described benefits of EMS and palliative care integration: early palliative provision,  
27 home-based care, respect of patient autonomy, improved patient and family QoL,  
28 increased patient and family satisfaction and confidence, improved EMS provider  
29 confidence, and decreased healthcare costs. Conversely, the consequences of non-  
30 integration were disregard of patient autonomy, performance of aggressive or futile  
31 interventions, and poor management of palliative patients by EMS.(13,14)

32  
33  
34 Provision of early, home-based palliative care by EMS was found to improve patient  
35 and family QoL, satisfaction and confidence as demonstrated by Carter, et al.(15)  
36 This study found high patient and family satisfaction with palliative provision from  
37 EMS providers, observing their compassion and skill in symptom management.(15)  
38 Furthermore, knowledge of the 24/7 availability of EMS providers in this programme  
39 provided confidence and peace of mind.(15) Paramedic comfort and confidence in  
40 palliative provision likewise improved during the study.(15)

41  
42  
43 Collaboration between EMS and palliative care networks was found to improve  
44 respect of patient autonomy.(5) An example was provided in a case study by



1  
2  
3 Clemency, et al. where a terminally ill patient was transported home from hospital,  
4 extubated and allowed to die at home according to her wishes.(35) This was  
5 facilitated by EMS under the guidance of palliative care specialists and in conjunction  
6 with a broader multidisciplinary team.(35)  
7  
8  
9

10 Several studies discussed the potential decreased healthcare costs resulting from  
11 EMS and palliative integration.(41,59,61,66) The decreased costs would,  
12 theoretically, result from provision of homecare, thus avoiding expensive and  
13 unnecessary hospital admissions.(61) A Finish study evaluating the integration of  
14 paramedics in EoL care argued that healthcare costs may be diminished through  
15 provision of homecare by paramedics in particular.(66)  
16  
17  
18  
19  
20  
21  
22  
23

#### 24 *Proposed recommendations for EMS and palliative care integration*

25 All 56 included studies made recommendations for EMS and palliative care  
26 integration. These were EMS provider education,(4) EMS and palliative system  
27 collaboration,(5) EMS palliative care guideline/protocol creation,(16) specialised out-  
28 of-hospital palliative care teams(34) and further research.(57) The following topics  
29 were highlighted as areas for EMS provider education: identifying patients with  
30 palliative needs,(41) palliative therapeutic goals,(44) legal documentation and  
31 advance care planning, ethics,(13) withholding and withdrawing treatment,(38,51)  
32 patient and family communication (including care-giver support),(47) symptom  
33 management,(54) interdisciplinary teamwork(59) and current palliative system  
34 structures.(58)  
35  
36  
37  
38  
39  
40  
41  
42  
43

44 Lamba, et al. detailed four steps for EMS and palliative care integration: 1) Identify  
45 EMS 'champions', 2) Review protocols and literature, 3) Perform a needs  
46 assessment, 4) Create an action plan.(6) The authors argued that optimal palliative  
47 care begins out-of-hospital and, therefore, palliative and EMS systems should  
48 collaborate.(6) Such collaborations between palliative and EMS systems, making  
49 use of newly developed palliative care guidelines and protocols for EMS providers,  
50 were successfully deployed in Canada,(15) Finland(66) and the USA.(34)  
51  
52  
53  
54  
55  
56

57 Concerning further research, the following areas were recommended: educational  
58 interventions,(46) development of EMS palliative care protocols,(16) defining the role  
59  
60

1  
2  
3 of EMS in palliative situations,(2) development of EMS palliative care policies and  
4 clarifying palliative care referral pathways,(2) cost-effectiveness of EMS and  
5 palliative care integration.(40,59,66)  
6  
7  
8  
9

## 10 11 **DISCUSSION**

12  
13  
14 This scoping review aimed to map existing EMS and palliative literature by  
15 identifying study types, extracting key findings, and noting limitations, thereby  
16 providing a summary of current evidence, context for EMS and palliative care  
17 integration and identifying knowledge gaps for future research.  
18  
19

20  
21 The topic of EMS and palliative care has gathered momentum in recent years as the  
22 role of EMS systems in out-of-hospital care has expanded; most studies included in  
23 this review (63%, n=35) being published between 2018 and 2022. While the body of  
24 literature has grown, there remains a relative dearth of empirical evidence, with only  
25 56 such studies identified here since the turn of the millennium. Many of these  
26 studies are small in scale, presenting limited findings. Common limitations include  
27 small sample sizes, limited external validity, use of unvalidated survey instruments,  
28 self-selection bias, recall bias and those resulting from retrospective approaches.  
29

30  
31 Despite these limitations, the literature, when aggregated, is consistent across  
32 various contexts. For example, similar challenges to EMS palliative provision, such  
33 as a lack of on-scene patient information, have been documented in both  
34 paramedic(26) and physician-led systems.(47) Moreover, findings regarding EMS  
35 role, challenges and integration benefits in palliative situations appear similar across  
36 HICs(68) and LMICs,(16) demonstrating the ubiquitous nature of the out-of-hospital  
37 environment.  
38

39  
40 Of importance, only two studies in this review (3.5%) were performed in LMIC  
41 countries,(16,69) revealing a significant knowledge gap. Due to disproportionately  
42 high burdens of disease and contemporaneous resource constraints, challenges and  
43 integration benefits in LMICs may be amplified when compared with HICs.(70,71)  
44 HICs have reported that 0.5-10% of EMS caseload comprises palliative  
45 situations.(47,57) With their greater disease burdens, this proportion is likely much  
46 larger within LMICs.(16) LMICs require novel approaches to this problem given their  
47  
48  
49  
50  
51  
52  
53  
54  
55  
56  
57  
58  
59  
60

1  
2  
3 resource constraints. The development of new, specialised out-of-hospital palliative  
4 care teams, for example, may not be feasible in LMICs. Capacitating already existing  
5 structures, EMS and palliative, to collaborate via alternative means may represent a  
6 more efficient use of scarce resources to achieve integration benefits.(59) Simply  
7 improving communication between the two systems may confer benefit as  
8 demonstrated by Dent, et al. where palliative telephonic advice provided to EMS  
9 resulted in decreased rates of hospital conveyance.(40) Similar integrative  
10 approaches have been successfully employed in HICs for mental health  
11 emergencies, linking mental healthcare worker with EMS and police to provide  
12 consult at point of care.(72)

20  
21 The 1990 Commission on Health Research for Development affirmed that  
22 strengthening LMIC research capacity is *“one of the most powerful, cost-effective,*  
23 *and sustainable means of advancing health and development”*.(73) Not only would  
24 LMICs benefit greatly from further research, but the cost-effective solutions  
25 developed would likewise benefit HICs where increasing health-care costs remain a  
26 challenge.(74) Considering amplified LMIC problems, solutions and the need for  
27 contextually suitable approaches, the need for, and yet lack of, EMS palliative care  
28 LMIC research is striking.

34  
35 While further research is needed, the existing literature supports, and indeed  
36 recommends, the integration of EMS and palliative care services whatever the  
37 context (paramedic vs. physician-led, HIC vs. LMIC).(5,16) Such integration would  
38 be congruous with the multi-disciplinary approach espoused by palliative care(3) and  
39 recommended by the World Health Organization (WHO).(75) The WHO has noted a  
40 growing demand for palliative care worldwide, with an insufficient corresponding  
41 supply of specialist palliative services.(75) Integration between palliative services  
42 and other disciplines is required to meet the need. Given the multi-disciplinary  
43 requirement of palliative care and the significant EMS palliative care intersection,  
44 integration between the two appears essential.

52  
53 Though a need for integration exists the question as to precise EMS roles in  
54 palliative situations remains. Whatever the specifics, several unique features of EMS  
55 may compliment palliative care provision: first-responder role, 24/7 availability,  
56 homecare provision and emergency capabilities.(6,10,76,77) The earlier palliative  
57  
58  
59  
60

1  
2  
3 care is implemented, the greater its efficacy.(78) EMS have the capability to both  
4 identify palliative needs and initiate palliative care immediately in their role as first  
5 responders.(6,76) Often patients with palliative needs wish to be treated at home but  
6 lack this option.(15) They may also suffer deleterious symptoms at any time of day or  
7 night requiring a hospital visit.(15) Out-of-hospital palliative care services frequently  
8 function exclusively during office hours leaving these patients without support.(13)  
9 The 24/7 availability of EMS, coupled with their homecare expertise, could  
10 ameliorate these gaps within palliative care provision and, in the not unlikely event of  
11 patient deterioration, EMS expertise in emergencies would be beneficial.(66)

12  
13 Various recommendations to promote EMS and palliative care integration have been  
14 made. However, the priorities of these recommendations have not been established.  
15 It is likewise unclear from the literature whether EMS and palliative care integration  
16 itself is of high priority within individual countries or globally. Further research is  
17 required not only to prioritise recommendations for integration, but to prioritise EMS  
18 and palliative care integration within unique healthcare systems. Priorities will likely  
19 vary across disparate contexts; however, the literature suggests integration should  
20 be favourably considered as it has potential to be a low-cost, high impact  
21 intervention aligned with WHO priorities. Such integration would result in improved  
22 palliative care provision and access,(16) providing these vulnerable patients with  
23 dignity through protection of their autonomy and avoidance of non-beneficial  
24 treatment. In addition, EMS and palliative care integration may result in cost and  
25 resource savings by decreasing hospital burdens.(61,66) This in turn would free  
26 resources for additional healthcare interventions. Other causal-sequence benefits  
27 may result including a unified healthcare approach and bringing together of siloed  
28 systems (EMS, palliative, in-hospital), which would result in further improved patient  
29 experience across the healthcare spectrum.

30  
31 A concern regarding this integration is that this expanded role would strain EMS  
32 resources by increasing caseload and time spent per incident.(77) Further  
33 investigation into this concern is needed across various contexts. However, existing  
34 evidence has shown no increased strain on caseload(66) and while time spent on  
35 scene does appear increased in certain palliative situations, these involve provision  
36 of homecare without conveyance.(66,76) Total time spent per incident appears to  
37  
38  
39  
40  
41  
42  
43  
44  
45  
46  
47  
48  
49  
50  
51  
52  
53  
54  
55  
56  
57  
58  
59  
60

1  
2  
3 decrease in these situations due to time-saving from avoidance of transport, hospital  
4 handover, ambulance cleaning and restocking.(76)  
5  
6

7 Research priorities regarding palliative care in the ED setting have been established  
8 by Quest, et al.:(79) 1) Which patients are in greatest need of palliative care services  
9 in the ED? 2) What is the optimal role of emergency clinicians in caring for patients  
10 along a chronic trajectory of illness? 3) What are the educational priorities for  
11 emergency clinical providers in the domain of palliative care? As EMS represent the  
12 out-of-hospital branch of emergency medicine, such priorities are germane.  
13  
14  
15  
16

17 Based on the included literature of this review, several specific EMS palliative care  
18 research gaps exist. There is a need for further epidemiological study, on a larger  
19 scale, across various contexts, particularly LMICs, to more accurately describe the  
20 impact of patients requiring palliative care upon EMS systems. Further intervention-  
21 based studies are required to test the effectiveness of various forms of EMS and  
22 palliative care integration, including their cost-effectiveness. The potential benefit of  
23 decreased healthcare costs remains theoretical and requires investigation.  
24  
25  
26  
27  
28  
29

30 Educational interventions require particular analysis as many questions remain  
31 unanswered: What EMS qualifications should be targeted? What content is most  
32 relevant? What level and type of intervention is required (i.e. undergraduate vs. post-  
33 graduate, informal vs. formal). Qualitative interview studies with palliative patients,  
34 family members and palliative specialists concerning EMS use in palliative care are  
35 largely lacking and would be beneficial as these are primary role players. Finally,  
36 both quantitative and qualitative data is needed from other stakeholders such as  
37 medical insurance companies which often cover the costs of both EMS and palliative  
38 services.  
39  
40  
41  
42  
43  
44  
45  
46  
47

## 48 **LIMITATIONS**

49 This review is not without limitation. Some relevant studies, including grey literature,  
50 may have been missed due to the selection criteria, databases searched, search  
51 string employed and researcher finitude. Furthermore, only English studies were  
52 selected. However, it is unlikely many relevant studies were omitted as a  
53 comprehensive search string was developed, piloted and employed in conjunction  
54 with a broad database range, meeting recommendations for an optimal search  
55  
56  
57  
58  
59  
60

1  
2  
3 strategy. Finally, the conclusions of this review should be observed with equipoise  
4 given the potential risk of bias, limited external validity of many included studies, and  
5 the need for further contextual and empirical evidence.  
6  
7  
8  
9

## 10 11 **CONCLUSION**

12  
13 Current literature suggests EMS and palliative care systems should integrate to  
14 improve palliative care provision. EMS have a role to play in out-of-hospital palliative  
15 care however, the specifics of this role require further investigation and are likely to  
16 differ across disparate contexts. Currently, when performing various functions in  
17 palliative situations, EMS providers are faced with several challenges which must be  
18 overcome to provide appropriate care. EMS provider education, collaboration  
19 between EMS and palliative systems, creation of EMS palliative care  
20 guidelines/protocols, creation of specialised out-of-hospital palliative care teams and  
21 further research have been recommended as solutions. Future research should  
22 focus on the prioritization, implementation, and effectiveness of these solutions  
23 cross-contextually; particularly in LMICs where the need, and potential impact, are  
24 most significant.  
25  
26  
27  
28  
29  
30  
31  
32  
33  
34  
35  
36

## 37 **AUTHOR CONTRIBUTIONS**

38  
39 CG, LG and WS designed the protocol. CG and CS collected data. CG drafted the  
40 manuscript with input from CS, LG and WS. All authors reviewed and gave final  
41 approval of the manuscript.  
42  
43  
44  
45  
46  
47

## 48 **COMPETING INTERESTS**

49  
50 The authors declare they have no competing interests.  
51  
52  
53  
54

## 55 **FUNDING**

56  
57 This research received no specific grant from any funding agency in the public,  
58 commercial or not-for-profit sectors.  
59  
60

## DATA SHARING STATEMENT

No additional data available.

## ETHICS APPROVAL

No participants were involved in the study and selected literature is publicly available, therefore, no ethical approval was required.

## REFERENCES

1. Waldrop D, Clemency B, Maguin E, Lindstrom H. Prehospital Providers' Perceptions of Emergency Calls Near Life's End. *Am J Hosp Palliat Care*. 2015;32(2):198–204.
2. Lord B, Récoché K, O'Connor M, et al. Paramedics' perceptions of Their Role in Palliative Care: Analysis of Focus Group Transcripts. *Journal of Palliative Care*. 2012;28(1):36-40.
3. WHO.int [Internet] c. 2022. Available from: <https://www.who.int/cancer/palliative/definition/en/>. Accessed on: 13/12/2022.
4. Rogers IR, Shearer FM, Ross-Adjie G, et al. Paramedics' perceptions and educational needs with respect to palliative care. *Australasian Journal of Paramedicine*. 2015;12(5):1-7.
5. Burnod A, Lenclud G, Ricard-Hibon A, et al. Collaboration between prehospital emergency medical teams and palliative care networks allows a better respect of a patient's will. *European Journal of Emergency Medicine*. 2021;19:46–47.
6. Lamba S, Schmidt TA, Chan GK, et al. Integrating Palliative Care in the Out-of-Hospital Setting: Four Things to Jump-Start an EMS-Palliative Care Initiative. *Prehospital Emergency Care*. 2013;17(4):511-520.
7. Patterson R, Standing H, Lee M, Dalkin S, et al. Paramedic information needs in end-of-life care: a qualitative interview study exploring access to a shared

- 1  
2  
3 electronic record as a potential solution. *BMC Palliative Care*. 2019;18:1–8.  
4  
5  
6 8. Wiese CHR, Bartels UE, Marczyńska K, et al. Quality of out-of-hospital  
7 palliative emergency care depends on the expertise of the emergency medical  
8 team - a prospective multi-centre analysis. *Support Care Cancer*.  
9 2009;17:1499–1506.  
10  
11  
12  
13 9. Schrijvers D, Fraeyenhove F Van. Emergencies in Palliative Care. *The Cancer*  
14 *Journal*. 2010;16(5):514–20.  
15  
16  
17 10. Long D. Paramedic delivery of community-based palliative care: An overlooked  
18 resource? *Prog Palliat Care*. 2019;27(6):289–90.  
19  
20  
21 11. Juhmann ML, Vandersman P, Butow PN, Clayton JM. Paramedics delivering  
22 palliative and end-of-life care in community-based settings: A systematic  
23 integrative review with thematic synthesis. *Palliat Med*. 2021;1-17.  
24  
25  
26  
27 12. Duchateau FX. Palliative care and prehospital emergency medicine -  
28 apparently conflicting approaches? *Eur J Emerg Med*. 2012;19:1.  
29  
30  
31 13. Carron P, Dami F, Diawara F, et al. Palliative Care and Prehospital Emergency  
32 Medicine: Analysis of a Case Series. *Medicine (Baltimore)*. 2014;93(25):1–3.  
33  
34  
35 14. Hoare S, Kelly MP, Prothero L, Barclay S. Ambulance staff and end-of-life  
36 hospital admissions: A qualitative interview study. *Palliat Med*.  
37 2018;32(9):1465-1473.  
38  
39  
40  
41 15. Carter AJE, Arab M, Rsw MSW, et al. Paramedics providing palliative care at  
42 home: A mixed-methods exploration of patient and family satisfaction and  
43 paramedic comfort and confidence. *CJEM*. 2020;21(4):513–22.  
44  
45  
46  
47 16. Gage CH, Geduld H, Stassen W. South African paramedic perspectives on  
48 prehospital palliative care. *BMC Palliat Care*. 2020;19(1):153.  
49  
50  
51 17. Gage CH, Stander C, Gwyther L, Stassen W. Emergency medical services  
52 and palliative care: protocol for a scoping review. *BMJ Open*.  
53 2022;12:e062054.  
54  
55  
56  
57 18. Arksey H, O'Malley L. Scoping studies: towards a methodological framework.  
58 *Int J Soc Res Methodol*. 2005;8(1):19–32.  
59  
60



19. Aromataris E, Riitano D. Constructing a search strategy and searching for evidence. A guide to the literature search for a systematic review. *Am J Nurs*. 2014 May;114(5):49-56.
20. Bramer WM, Rethlefsen ML, Kleijnen J, Franco OH. Optimal database combinations for literature searches in systematic reviews: a prospective exploratory study. *Syst Rev*. 2017;6:1–12.
21. Tieman JJ, Sladek RM, Currow DC. Multiple sources: mapping the literature of palliative care. *Palliat Med*. 2009 Jul;23(5):425-31.
22. Mendeley.com [Internet] c. 2022. Available from: <https://www.mendeley.com/download-reference-manager/>. Accessed on: 13/12/2022.
23. Ouzzani M, Hammady H, Fedorowicz Z, Elmagarmid A. Rayyan - a web and mobile app for systematic reviews. *Systematic Reviews*. 2016;(5):210.
24. Prisma-statement.org [Internet] c. 2021. Available from: [http://www.prisma-statement.org/documents/PRISMA-ScR-Fillable-Checklist\\_11Sept2019.pdf](http://www.prisma-statement.org/documents/PRISMA-ScR-Fillable-Checklist_11Sept2019.pdf). Accessed on: 07/06/2021.
25. Page MJ, Moher D. Evaluations of the uptake and impact of the Preferred Reporting Items for Systematic reviews and Meta-Analyses (PRISMA) Statement and extensions: a scoping review. *Syst Rev*. 2017;6(1):263.
26. Waldrop DP, Clemency B, Lindstrom HA, Cordes CC. "We Are Strangers Walking Into Their Life-Changing Event": How Prehospital Providers Manage Emergency Calls at the End of Life. *J Pain Symptom Manage*. 2015;50(3):328–34.
27. Waldrop DP, McGinley JM, Dailey MW, Clemency B. Decision-Making in the Moments Before Death: Challenges in Prehospital Care. *Prehosp Emerg Care*. 2019;23(3):356–63.
28. Waldrop DP, McGinley JM, Clemency B. Mediating Systems of Care: Emergency Calls to Long-Term Care Facilities at Life's End. *J Palliat Med*. 2018;21(7):987–91.
29. Fitzpatrick S, Somers S, Stryckman B, Gingold DB. Improving Hospice and

- 1  
2  
3 Palliative Care Through Nurse Practitioner Engagement in a Community  
4 Paramedicine Program. *J Nurse Pract.* 2022;18(7):769.  
5  
6  
7  
8 30. Wenger A, Potilechio M, Redinger K, et al. Care for a Dying Patient: EMS  
9 Perspectives on Caring for Hospice Patients. *J Pain Symptom Manag.*  
10 2022;64(2):e71–6.  
11  
12  
13 31. Breyre AM, Benesch T, Glomb NW, et al.. EMS Experience Caring and  
14 Communicating with Patients and Families with a Life-Limiting-Illness.  
15 *Prehosp Emerg Care.* 2022;26(5):708–15.  
16  
17  
18  
19 32. Ausband SC, March JA, Brown LH. National Prevalence of palliative care  
20 protocols in emergency medical services. *Prehosp Emerg Care.* 2002;6:36–41.  
21  
22  
23 33. Breyre AM, Bains G, Moore J, et al. Hospice and Comfort Care Patient  
24 Utilization of Emergency Medical Services. *J Palliat Med.* 2021;1-6.  
25  
26  
27 34. Breyre A, Taigman M, Salvucci A, Sporer K. Effect of a Mobile Integrated  
28 Hospice Healthcare Program on Emergency Medical Services Transport to the  
29 Emergency Department. *Prehosp Emerg Care.* 2021;1-6.  
30  
31  
32  
33 35. Clemency BM, Grimm KT, Lauer SL, et al. Transport Home and Terminal  
34 Extubation by Emergency Medical Services: An Example of Innovation in End-  
35 of-Life Care. *J Pain Symptom Manage.* 2019;58(2):355–9.  
36  
37  
38  
39 36. Donnelly CB, Armstrong KA, Perkins MM, et al. Emergency Medical Services  
40 Provider Experiences of Hospice Care. *Prehosp Emerg Care.* 2018;22(2):237–  
41 43.  
42  
43  
44 37. McGinley J, Waldrop DP, Clemency B. Emergency medical services providers'  
45 perspective of end-of-life decision making for people with intellectual  
46 disabilities. *J Appl Res Intellect Disabil.* 2017;30(6):1057–64.  
47  
48  
49  
50 38. Stone SC, Abbott J, McClung CD, et al. Paramedic knowledge, attitudes, and  
51 training in end-of-life care. *Prehosp Disaster Med.* 2009;24(6):529–34.  
52  
53  
54 39. Waldrop DP, Clemency B, Maguin E, Lindstrom H. Preparation for frontline  
55 end-of-life care: exploring the perspectives of paramedics and emergency  
56 medical technicians. *J Palliat Med.* 2014;17(3):338–41.  
57  
58  
59  
60

- 1
  - 2
  - 3
  - 4
  - 5
  - 6
  - 7
  - 8
  - 9
  - 10
  - 11
  - 12
  - 13
  - 14
  - 15
  - 16
  - 17
  - 18
  - 19
  - 20
  - 21
  - 22
  - 23
  - 24
  - 25
  - 26
  - 27
  - 28
  - 29
  - 30
  - 31
  - 32
  - 33
  - 34
  - 35
  - 36
  - 37
  - 38
  - 39
  - 40
  - 41
  - 42
  - 43
  - 44
  - 45
  - 46
  - 47
  - 48
  - 49
  - 50
  - 51
  - 52
  - 53
  - 54
  - 55
  - 56
  - 57
  - 58
  - 59
  - 60
40. Dent T, Tipping I, Anderson R, Daniels C. Hospice advice and rapid response service for ambulance clinicians. *BMJ Support Palliat Care*. 2020;10(3):296–9.
41. Eaton-Williams P, Barrett J, Mortimer C, Williams J. A national survey of ambulance paramedics on the identification of patients with end of life care needs. *Br Paramed J*. 2020;5(3):8–14.
42. Goodwin L, Proctor A, Kirby K, et al. Staff stakeholder views on the role of UK paramedics in advance care planning for patients in their last year of life. *Prog Palliat Care*. 2021;29(2):76–83.
43. Kirk A, Crompton PW, Knighting K, et al. Paramedics and their role in end-of-life care: perceptions and confidence. *J Paramed Pract*. 2017;9(2):71–9.
44. Murphy-Jones G, Timmons S. Paramedics' experiences of end-of-life care decision making with regard to nursing home residents: an exploration of influential issues and factors. *Emerg Med J*. 2016;33(10):722–6.
45. Pease NJ, Sundararaj JJ, O'Brian E, Hayes J, Presswood E, Buxton S. Paramedics and serious illness: Communication training. *BMJ Support Palliat Care*. 2019;0:1-8.
46. Pentaris P, Mehmet N. Attitudes and perceptions of paramedics about end-of-life care: a literature review. *J Paramed Pract*. 2019;11(5):206–15.
47. Kamphausen A, Roese H, Oechsle K, et al. Challenges Faced by Prehospital Emergency Physicians Providing Emergency Care to Patients with Advanced Incurable Diseases. *Emerg Med Int*. 2019;2019.
48. Leibold A, Lassen C, Lindenberg N, et al. Is every life worth saving: does religion and religious beliefs influence paramedic's end-of-life decision-making? A prospective questionnaire-based investigation. *Indian J Palliat Care* 2018;24:9.
49. Taghavi M, Simon A, Kappus S, et al. Paramedics experiences and expectations concerning advance directives: a prospective, questionnaire-based, bi-centre study. *Palliat Med*. 2012;26(7):908–16.
50. Wiese CHR, Lassen CL, Bartels UE, et al. International recommendations for outpatient palliative care and prehospital palliative emergencies – a

- 1  
2  
3 prospective questionnaire-based investigation. *BMC Palliative Care*.  
4 2013;12:10.  
5  
6  
7 51. Wiese CHR, Taghavi M, Meyer N, et al. Paramedics' "end-of-life" decision  
8 making in palliative emergencies. *J Paramed Pract*. 2012;4(7):413–9.  
9  
10  
11 52. Wiese CHR, Bartels UE, Zausig YA, et al. Prehospital emergency treatment of  
12 palliative care patients with cardiac arrest: a retrospective investigation. *Support*  
13 *Care Cancer*. 2010;18(10):1287–92.  
14  
15  
16  
17 53. Wiese CHR, Bartels UE, Ruppert D, et al. Treatment of palliative care  
18 emergencies by prehospital emergency physicians in Germany: an interview  
19 based investigation. *Palliat Med*. 2009;23(4):369–73.  
20  
21  
22  
23 54. Wiese CHR, Barrels UE, Graf BM, Hanekop GG. Out-of-hospital opioid  
24 therapy of palliative care patients with "acute dyspnoea": a retrospective  
25 multicenter investigation. *J Opioid Manag*. 2009;5(2):115–22.  
26  
27  
28  
29 55. Hauch H, El Mohoui N, Wolff JEA, et al. Out-of-Hospital Emergencies in  
30 Children Under Palliative Home Care. *Front Pediatr*. 2021;9.  
31  
32  
33 56. James HSE, Smith AC, Thomas EE, et al. Exploring paramedics' intention to  
34 use a specialist palliative care telehealth service. *Prog Palliat Care*.  
35 2021;29(2):106–13.  
36  
37  
38  
39 57. Lord B, Andrew E, Henderson A, et al. Palliative care in paramedic practice: A  
40 retrospective cohort study. *Palliat Med*. 2019;33(4):445–51.  
41  
42  
43 58. Mott C, Herbert A, Malcolm K, et al. Emergencies in Pediatric Palliative Care:  
44 A Survey of Ambulance Officers to Understand the Interface between Families  
45 and Ambulance Services. *J Palliat Med*. 2020;23(12):1649–52.  
46  
47  
48  
49 59. Swetenham K, Grantham H, Glaetzer K. Breaking down the silos:  
50 Collaboration delivering an efficient and effective response to palliative care  
51 emergencies. *Prog Palliat Care*. 2014;22(4):212–8.  
52  
53  
54  
55 60. Juhmann ML, Anderson NE, Boughey M, et al. Palliative paramedicine:  
56 Comparing clinical practice through guideline quality appraisal and qualitative  
57 content analysis. *Palliat Med*. 2022;36(8):1228–41.  
58  
59  
60

- 1  
2  
3 61. Rosa A, Dissanayake M, Carter D, Sibbald S. Community paramedicine to  
4 support palliative care. *Prog Palliat Care*. 2021;1-5.  
5  
6
- 7 62. Carter AJE, Harrison M, Kryworuchko J, et al. Essential Elements to  
8 Implementing a Paramedic Palliative Model of Care: An Application of the  
9 Consolidated Framework for Implementation Research. *J Palliat Med*.  
10 2022;25(9):1345–54.  
11  
12
- 13 63. Carter AJE, Harrison M, Goldstein J, et al. Providing palliative care at home  
14 aligns with the professional identity of paramedics: a qualitative study of  
15 paramedics and palliative health care providers. *Can J Emerg Med*.  
16 2022;24(7):751–9.  
17  
18
- 19 64. McCormick G, Thompson SR. The Provision of Palliative and End-of-Life Care  
20 by Paramedics in New Zealand Communities: A Review of International  
21 Practice and the New Zealand Context. *Whitireia Nurs Heal J*. 2019;(26):51–7.  
22  
23
- 24 65. Anderson NE, Robinson J, Goodwin H, Gott M. “Mum, I think we might ring the  
25 ambulance, okay?” A qualitative exploration of bereaved family members’  
26 experiences of emergency ambulance care at the end of life. *Palliat Med*.  
27 2022;36(9):1389–95.  
28  
29
- 30 66. Surakka LK, Peake MM, Kiljunen MM, et al. Preplanned participation of  
31 paramedics in end-of-life care at home: A retrospective cohort study. *Palliat*  
32 *Med*. 2020;1-8.  
33  
34
- 35 67. Surakka LK, Hökkä M, Törrönen K, et al. Paramedics’ experiences and  
36 educational needs when participating end-of-life care at home: A mixed  
37 method study. *Palliat Med*. 2022;36(8):1217–27.  
38  
39
- 40 68. Peran D, Uhlir M, Pekara J, et al. Approaching the End of Their Lives Under  
41 Blue Lights and Sirens – Scoping Review. *J Pain Symptom Manage*. 2021;1-  
42 11.  
43  
44
- 45 69. Boaventura JR, Pessalacia JDR, Ribeiro AA, et al. Palliative care in the pre-  
46 hospital service in Brazil: experiences of health professionals. *BMC Palliat*  
47 *Care*. 2022;21(1):1–11.  
48  
49
- 50 70. Gov.uk [Internet] c. 2022. Available from:  
51  
52  
53  
54  
55  
56  
57  
58  
59  
60

- 1  
2  
3  
4  
5  
6  
7  
8  
9  
10  
11  
12  
13  
14  
15  
16  
17  
18  
19  
20  
21  
22  
23  
24  
25  
26  
27  
28  
29  
30  
31  
32  
33  
34  
35  
36  
37  
38  
39  
40  
41  
42  
43  
44  
45  
46  
47  
48  
49  
50  
51
- [https://assets.publishing.service.gov.uk/media/5d42be4eed915d09d8945db9/SRIA\\_-\\_REA\\_final\\_\\_Dec\\_2019\\_Heart\\_\\_\\_003\\_.pdf](https://assets.publishing.service.gov.uk/media/5d42be4eed915d09d8945db9/SRIA_-_REA_final__Dec_2019_Heart___003_.pdf). Accessed on: 14/12/2022.
71. Franzen SRP, Chandler C, Lang T. Health research capacity development in low and middle income countries: Reality or rhetoric? A systematic meta-narrative review of the qualitative literature. *BMJ Open*. 2017;7(1).
72. Huppert D, Griffiths M. Police Mental Health Partnership project: Police Ambulance Crisis Emergency Response (PACER) model development. *Australas Psychiatry*. 2015;23(5):520–3.
73. Binns CW. Health Research-Essential Link to Equity in Development. *Asia Pacific Journal of Public Health*. 1990;4(4):278-278.
74. WHO.int [Internet]. c. 2022. Available from: <https://www.who.int/publications/i/item/who-his-hgf-hfworkingpaper-19.4>. Accessed on: 14/12/2022.
75. WHO.int [Internet]. c. 2022. Available from: <https://apps.who.int/iris/handle/10665/345532>. Accessed on: 14/12/2022.
76. Helmer J, Baranowski L, Armour R, et al. Developing a paramedic approach to palliative emergencies. *Prog Palliat Care*. 2021;29(2):72–5.
77. Pekarsky B, Seymour-Walsh A, Wright C, et al. The role of ambulance services in reducing the gaps in access to end-of-life care: from conversations to policy. *Prog Palliat Care*. 2021;29(2):98–105.
78. Rowland K. Palliative care: Earlier is better. *J Fam Pract*. 2010;59(12):695–7.
79. Quest TE, Asplin BR, Cairns CB, et al. Research priorities for palliative and end-of-life care in the emergency setting. *Acad Emerg Med*. 2011;18(6):e70-6.

## FIGURE LEGEND

52  
53  
54  
55  
56  
57  
58  
59  
60

**Figure 1 – PRISMA Selection Process Flow Diagram(25)**

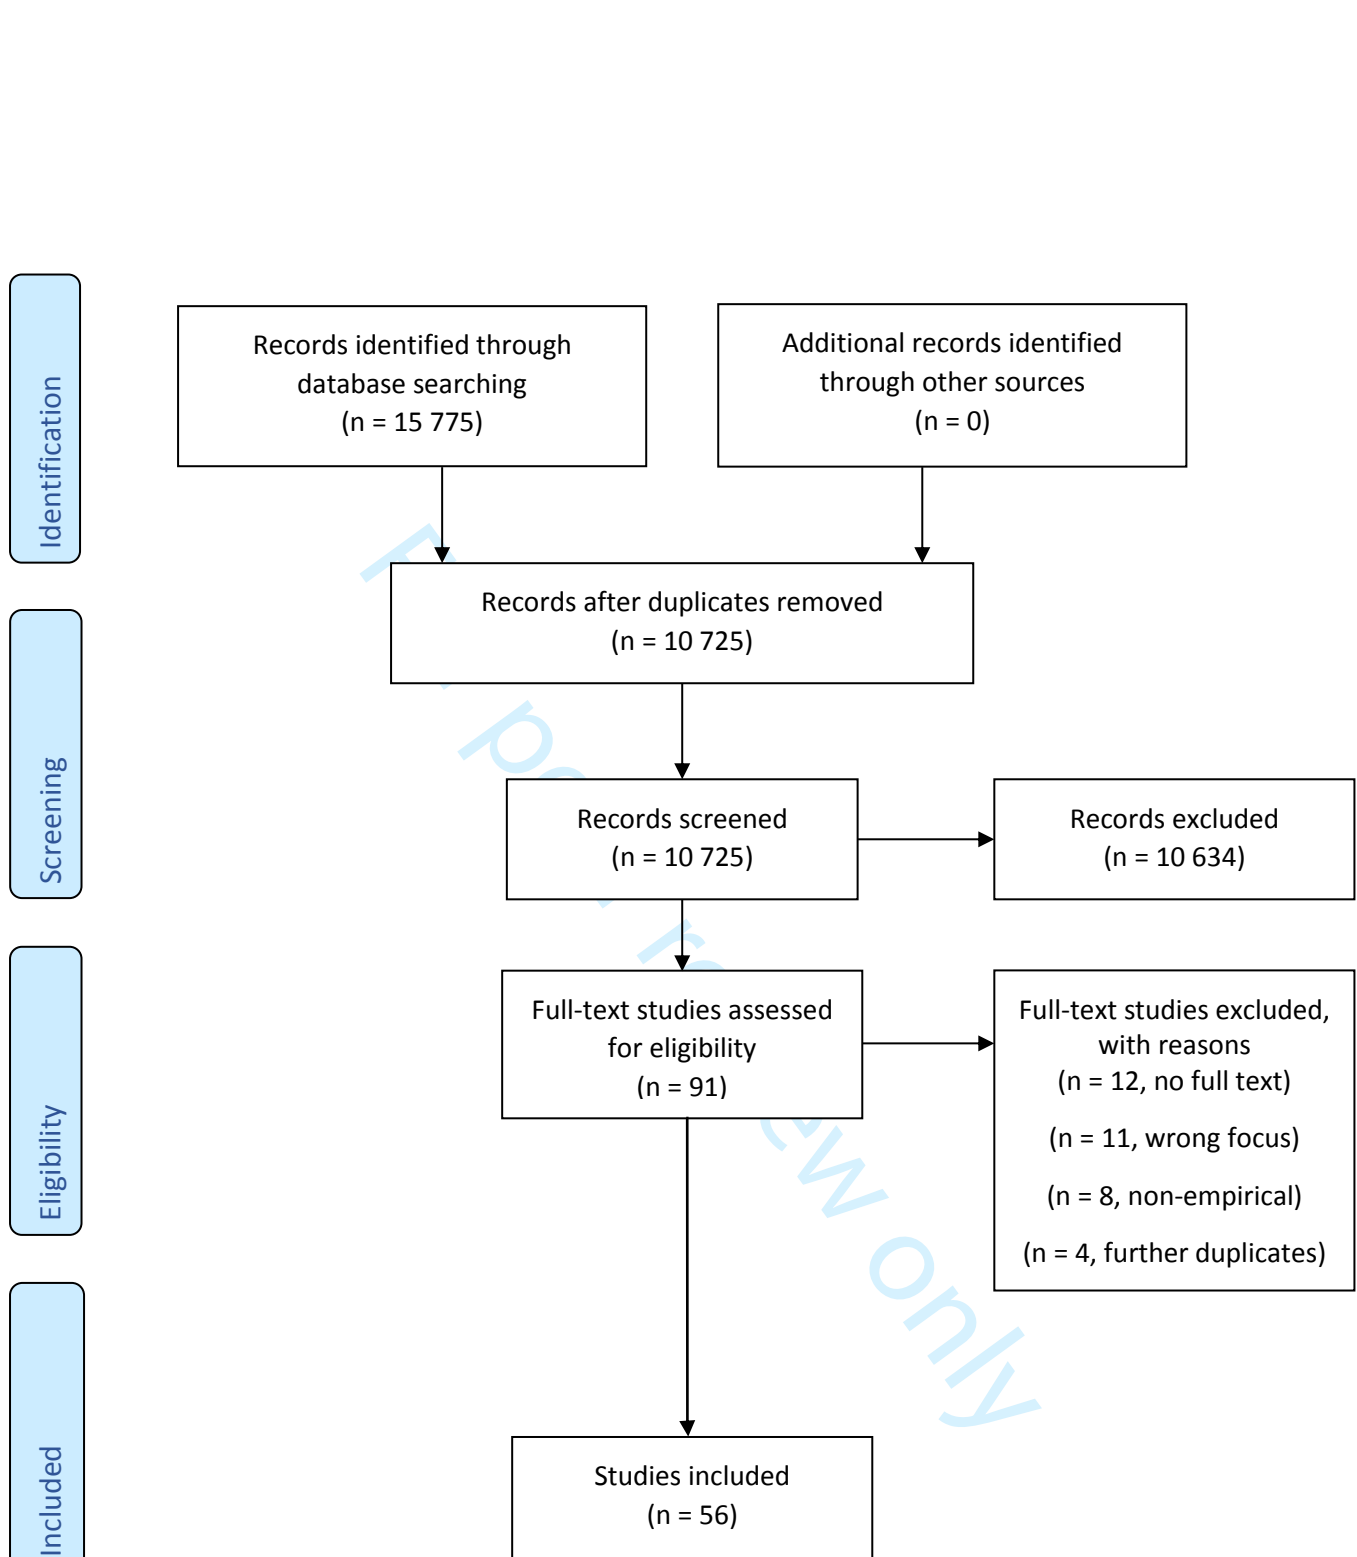

### CINAHL Search String

1  
2  
3  
4  
5  
6  
7  
8  
9  
10  
11  
12  
13  
14  
15  
16  
17  
18  
19  
20  
21  
22  
23  
24  
25  
26  
27  
28  
29  
30  
31  
32  
33  
34  
35  
36  
37  
38  
39  
40  
41  
42  
43  
44  
45  
46  
47  
48  
49  
50  
51  
52  
53  
54  
55  
56  
57  
58  
59  
60

("Palliative" OR "Palliative care" OR "Palliative medicine" OR "Palliative management" OR "Palliative nursing" OR "Palliative care nursing" OR "Palliative care nurse" OR "Palliative care nurses" OR "Palliative patient" OR "Palliative patients" OR "Palliation" OR "Palliative situation" OR "Palliative situations" OR "Palliative emergency" OR "Palliative emergencies" OR "Palliative care protocol" OR "Palliative care protocols" OR "Emergency palliative care" OR "Emergency palliation" OR "Early palliation" OR "Early palliative care" OR "Early hospice care" OR "Palliative unit" OR "Palliative units" OR "Palliative care unit" OR "Palliative care units" OR "Hospice care" OR "Hospice" OR "Hospice and palliative care nursing" OR "Hospice and palliative nursing" OR "Hospice and palliation" OR "Hospice nurse" OR "Hospice nurses" OR "Hospice physician" OR "Hospice physicians" OR "Hospice service" OR "Hospice services" OR "End of life care" OR "End of life" OR "Terminal care" OR "Terminal patient" OR "Terminal patients" OR "Terminal illness" OR "Terminal illnesses" OR "Terminally ill" OR "Dying patient" OR "Dying patients" OR "Chronic patient" OR "Chronic patients" OR "Chronic illness" OR "Chronic illnesses" OR "Chronic care" OR "Palliative home care" OR "Home based care" OR "Home care" OR "Home based palliative care" OR "Home palliative care" OR "Home palliation" OR "Palliative care team" OR "Palliative care teams" OR "Palliative care service" OR "Palliative care services" OR "Palliative service" OR "Palliative services" OR "Palliative specialist" OR "Palliative specialists" OR "Palliative physician" OR "Palliative physicians" OR "Palliative care physician" OR "Palliative care physicians" OR "Palliative doctor" OR "Palliative doctors" OR "Palliative care doctor" OR "Palliative care doctors" OR "Palliative care giver" OR "Palliative caregiver" OR "Palliative care givers" OR "Palliative caregivers" OR "Advance care plan" OR "Advance care planning" OR "Advanced disease" OR "Advanced diseases" OR "Prehospital palliative care" OR "Out of hospital palliative care") AND ("Emergency medical services" OR "EMS" OR "EMS staff" OR "EMS system" OR "Emergency medical system" OR "Emergency medical services system" OR "Emergency medical service system" OR "Emergency medical service protocol" OR "Emergency medical services protocol" OR "Emergency medical service protocols" OR "Emergency medical services protocols" OR "EMS protocol" OR "EMS protocols" OR "Emergency medical service" OR "Emergency health service" OR "Emergency health services")



1  
2  
3 OR "Emergency services" OR "Emergency care" OR "Emergency medical care" OR  
4 "Emergency healthcare" OR "Emergency treatment" OR "Emergency treatments" OR  
5 "Emergency medical treatment" OR "Emergency management" OR "Emergency  
6 medical management" OR "Out of hospital emergency care" OR "Prehospital care"  
7 OR "Prehospital emergency care" OR "Pre hospital" OR "Prehospital" OR "Out of  
8 hospital" OR "Out-of-hospital" OR "Paramedic" OR "Paramedics" OR "Emergency  
9 paramedic" OR "Emergency paramedics" OR "Ambulance" OR "Ambulances" OR  
10 "Ambulance staff" OR "Emergency medical provider" OR "Emergency medical  
11 providers" OR "Emergency medical technician" OR "Emergency medical technicians"  
12 OR "Emergency medical practitioner" OR "Emergency medical practitioners" OR  
13 "Emergency provider" OR "Emergency providers" OR "Emergency technician" OR  
14 "Emergency technicians" OR "Emergency practitioner" OR "Emergency practitioners"  
15 OR "Prehospital emergency provider" OR "Prehospital emergency providers" OR  
16 "Emergency responder" OR "Emergency responders" OR "First responder" OR "First  
17 responders" OR "Emergency doctor" OR "Emergency doctors" OR "Emergency  
18 medical doctor" OR "Emergency medical doctors" OR "Emergency physician" OR  
19 "Emergency physicians" OR "Emergency medical physician" OR "Emergency  
20 medical physicians" OR "Emergency clinician" OR "Emergency clinicians" OR  
21 "Emergency medical clinician" OR "Emergency medical clinicians" OR "Emergency  
22 medical staff" OR "Emergency medical personnel" OR "Transfer" OR "Transfers" OR  
23 "Interhospital transfer" OR "Interhospital transfers" OR "Home transfer" OR "Transfer  
24 home" OR "Emergency medical team" OR "Emergency medical teams")

#### Embase (Scopus) Search String

25  
26  
27  
28  
29  
30  
31  
32  
33  
34  
35  
36  
37  
38  
39  
40  
41  
42  
43  
44  
45  
46 TITLE-ABS-KEY(("Palliative" OR "Palliative care" OR "Palliative medicine" OR  
47 "Palliative management" OR "Palliative nursing" OR "Palliative care nursing" OR  
48 "Palliative care nurse" OR "Palliative care nurses" OR "Palliative patient" OR  
49 "Palliative patients" OR "Palliation" OR "Palliative situation" OR "Palliative situations"  
50 OR "Palliative emergency" OR "Palliative emergencies" OR "Palliative care protocol"  
51 OR "Palliative care protocols" OR "Emergency palliative care" OR "Emergency  
52 palliation" OR "Early palliation" OR "Early palliative care" OR "Early hospice care"  
53 OR "Palliative unit" OR "Palliative units" OR "Palliative care unit" OR "Palliative care  
54 units" OR "Hospice care" OR "Hospice" OR "Hospice and palliative care nursing" OR  
55  
56  
57  
58  
59  
60

1  
2  
3 "Hospice and palliative nursing" OR "Hospice and palliation" OR "Hospice nurse" OR  
4 "Hospice nurses" OR "Hospice physician" OR "Hospice physicians" OR "Hospice  
5 service" OR "Hospice services" OR "End of life care" OR "End of life" OR "Terminal  
6 care" OR "Terminal patient" OR "Terminal patients" OR "Terminal illness" OR  
7 "Terminal illnesses" OR "Terminally ill" OR "Dying patient" OR "Dying patients" OR  
8 "Chronic patient" OR "Chronic patients" OR "Chronic illness" OR "Chronic illnesses"  
9 OR "Chronic care" OR "Palliative home care" OR "Home based care" OR "Home  
10 care" OR "Home based palliative care" OR "Home palliative care" OR "Home  
11 palliation" OR "Palliative care team" OR "Palliative care teams" OR "Palliative care  
12 service" OR "Palliative care services" OR "Palliative service" OR "Palliative services"  
13 OR "Palliative specialist" OR "Palliative specialists" OR "Palliative physician" OR  
14 "Palliative physicians" OR "Palliative care physician" OR "Palliative care physicians"  
15 OR "Palliative doctor" OR "Palliative doctors" OR "Palliative care doctor" OR  
16 "Palliative care doctors" OR "Palliative care giver" OR "Palliative caregiver" OR  
17 "Palliative care givers" OR "Palliative caregivers" OR "Advance care plan" OR  
18 "Advance care planning" OR "Advanced disease" OR "Advanced diseases" OR  
19 "Prehospital palliative care" OR "Out of hospital palliative care") AND ("Emergency  
20 medical services" OR "EMS" OR "EMS staff" OR "EMS system" OR "Emergency  
21 medical system" OR "Emergency medical services system" OR "Emergency medical  
22 service system" OR "Emergency medical service protocol" OR "Emergency medical  
23 services protocol" OR "Emergency medical service protocols" OR "Emergency  
24 medical services protocols" OR "EMS protocol" OR "EMS protocols" OR "Emergency  
25 medical service" OR "Emergency health service" OR "Emergency health services"  
26 OR "Emergency services" OR "Emergency care" OR "Emergency medical care" OR  
27 "Emergency healthcare" OR "Emergency treatment" OR "Emergency treatments"  
28 OR "Emergency medical treatment" OR "Emergency management" OR "Emergency  
29 medical management" OR "Out of hospital emergency care" OR "Prehospital care"  
30 OR "Prehospital emergency care" OR "Pre hospital" OR "Prehospital" OR "Out of  
31 hospital" OR "Out-of-hospital" OR "Paramedic" OR "Paramedics" OR "Emergency  
32 paramedic" OR "Emergency paramedics" OR "Ambulance" OR "Ambulances" OR  
33 "Ambulance staff" OR "Emergency medical provider" OR "Emergency medical  
34 providers" OR "Emergency medical technician" OR "Emergency medical  
35 technicians" OR "Emergency medical practitioner" OR "Emergency medical  
36 practitioners" OR "Emergency provider" OR "Emergency providers" OR "Emergency

1  
2  
3 technician" OR "Emergency technicians" OR "Emergency practitioner" OR  
4 "Emergency practitioners" OR "Prehospital emergency provider" OR "Prehospital  
5 emergency providers" OR "Emergency responder" OR "Emergency responders" OR  
6 "First responder" OR "First responders" OR "Emergency doctor" OR "Emergency  
7 doctors" OR "Emergency medical doctor" OR "Emergency medical doctors" OR  
8 "Emergency physician" OR "Emergency physicians" OR "Emergency medical  
9 physician" OR "Emergency medical physicians" OR "Emergency clinician" OR  
10 "Emergency clinicians" OR "Emergency medical clinician" OR "Emergency medical  
11 clinicians" OR "Emergency medical staff" OR "Emergency medical personnel" OR  
12 "Transfer" OR "Transfers" OR "Interhospital transfer" OR "Interhospital transfers" OR  
13 "Home transfer" OR "Transfer home" OR "Emergency medical team" OR  
14 "Emergency medical teams")) AND NOT INDEX(medline)

#### PsycInfo Search String

25  
26  
27  
28  
29 ("Palliative" OR "Palliative care" OR "Palliative medicine" OR "Palliative  
30 management" OR "Palliative nursing" OR "Palliative care nursing" OR "Palliative care  
31 nurse" OR "Palliative care nurses" OR "Palliative patient" OR "Palliative patients" OR  
32 "Palliation" OR "Palliative situation" OR "Palliative situations" OR "Palliative  
33 emergency" OR "Palliative emergencies" OR "Palliative care protocol" OR "Palliative  
34 care protocols" OR "Emergency palliative care" OR "Emergency palliation" OR "Early  
35 palliation" OR "Early palliative care" OR "Early hospice care" OR "Palliative unit" OR  
36 "Palliative units" OR "Palliative care unit" OR "Palliative care units" OR "Hospice  
37 care" OR "Hospice" OR "Hospice and palliative care nursing" OR "Hospice and  
38 palliative nursing" OR "Hospice and palliation" OR "Hospice nurse" OR "Hospice  
39 nurses" OR "Hospice physician" OR "Hospice physicians" OR "Hospice service" OR  
40 "Hospice services" OR "End of life care" OR "End of life" OR "Terminal care" OR  
41 "Terminal patient" OR "Terminal patients" OR "Terminal illness" OR "Terminal  
42 illnesses" OR "Terminally ill" OR "Dying patient" OR "Dying patients" OR "Chronic  
43 patient" OR "Chronic patients" OR "Chronic illness" OR "Chronic illnesses" OR  
44 "Chronic care" OR "Palliative home care" OR "Home based care" OR "Home care"  
45 OR "Home based palliative care" OR "Home palliative care" OR "Home palliation"  
46 OR "Palliative care team" OR "Palliative care teams" OR "Palliative care service" OR  
47  
48  
49  
50  
51  
52  
53  
54  
55  
56  
57  
58  
59  
60

1  
2  
3 “Palliative care services” OR “Palliative service” OR “Palliative services” OR  
4  
5 “Palliative specialist” OR “Palliative specialists” OR “Palliative physician” OR  
6  
7 “Palliative physicians” OR “Palliative care physician” OR “Palliative care physicians”  
8  
9 OR “Palliative doctor” OR “Palliative doctors” OR “Palliative care doctor” OR  
10  
11 “Palliative care doctors” OR “Palliative care giver” OR “Palliative caregiver” OR  
12  
13 “Palliative care givers” OR “Palliative caregivers” OR “Advance care plan” OR  
14  
15 “Advance care planning” OR “Advanced disease” OR “Advanced diseases” OR  
16  
17 “Prehospital palliative care” OR “Out of hospital palliative care”) AND (“Emergency  
18  
19 medical services” OR “EMS” OR “EMS staff” OR “EMS system” OR “Emergency  
20  
21 medical system” OR “Emergency medical services system” OR “Emergency medical  
22  
23 service system” OR “Emergency medical service protocol” OR “Emergency medical  
24  
25 services protocol” OR “Emergency medical service protocols” OR “Emergency  
26  
27 medical services protocols” OR “EMS protocol” OR “EMS protocols” OR “Emergency  
28  
29 medical service” OR “Emergency health service” OR “Emergency health services”  
30  
31 OR “Emergency services” OR “Emergency care” OR “Emergency medical care” OR  
32  
33 “Emergency healthcare” OR “Emergency treatment” OR “Emergency treatments” OR  
34  
35 “Emergency medical treatment” OR “Emergency management” OR “Emergency  
36  
37 medical management” OR “Out of hospital emergency care” OR “Prehospital care”  
38  
39 OR “Prehospital emergency care” OR “Pre hospital” OR “Prehospital” OR “Out of  
40  
41 hospital” OR “Out-of-hospital” OR “Paramedic” OR “Paramedics” OR “Emergency  
42  
43 paramedic” OR “Emergency paramedics” OR “Ambulance” OR “Ambulances” OR  
44  
45 “Ambulance staff” OR “Emergency medical provider” OR “Emergency medical  
46  
47 providers” OR “Emergency medical technician” OR “Emergency medical technicians”  
48  
49 OR “Emergency medical practitioner” OR “Emergency medical practitioners” OR  
50  
51 “Emergency provider” OR “Emergency providers” OR “Emergency technician” OR  
52  
53 “Emergency technicians” OR “Emergency practitioner” OR “Emergency practitioners”  
54  
55 OR “Prehospital emergency provider” OR “Prehospital emergency providers” OR  
56  
57 “Emergency responder” OR “Emergency responders” OR “First responder” OR “First  
58  
59 responders” OR “Emergency doctor” OR “Emergency doctors” OR “Emergency  
60  
medical doctor” OR “Emergency medical doctors” OR “Emergency physician” OR  
“Emergency physicians” OR “Emergency medical physician” OR “Emergency  
medical physicians” OR “Emergency clinician” OR “Emergency clinicians” OR  
“Emergency medical clinician” OR “Emergency medical clinicians” OR “Emergency  
medical staff” OR “Emergency medical personnel” OR “Transfer” OR “Transfers” OR

1  
2  
3 “Interhospital transfer” OR “Interhospital transfers” OR “Home transfer” OR “Transfer  
4 home” OR “Emergency medical team” OR “Emergency medical teams”)  
5  
6  
7  
8

9  
10 MEDLINE (PubMed) Search String  
11

12 (“Palliative”[tw] OR “Palliative care”[tw] OR “Palliative medicine”[tw] OR “Palliative  
13 management”[tw] OR “Palliative nursing”[tw] OR “Palliative care nursing”[tw] OR  
14 “Palliative care nurse”[tw] OR “Palliative care nurses”[tw] OR “Palliative patient”[tw]  
15 OR “Palliative patients”[tw] OR “Palliation”[tw] OR “Palliative situation”[tw] OR  
16 “Palliative situations”[tw] OR “Palliative emergency”[tw] OR “Palliative  
17 emergencies”[tw] OR “Palliative care protocol”[tw] OR “Palliative care protocols”[tw]  
18 OR “Emergency palliative care”[tw] OR “Emergency palliation”[tw] OR “Early  
19 palliation”[tw] OR “Early palliative care”[tw] OR “Early hospice care”[tw] OR  
20 “Palliative unit”[tw] OR “Palliative units”[tw] OR “Palliative care unit”[tw] OR “Palliative  
21 care units”[tw] OR “Hospice care”[tw] OR “Hospice”[tw] OR “Hospice and palliative  
22 care nursing”[tw] OR “Hospice and palliative nursing”[tw] OR “Hospice and  
23 palliation”[tw] OR “Hospice nurse”[tw] OR “Hospice nurses”[tw] OR “Hospice  
24 physician”[tw] OR “Hospice physicians”[tw] OR “Hospice service”[tw] OR “Hospice  
25 services”[tw] OR “End of life care”[tw] OR “End of life”[tw] OR “Terminal care”[tw] OR  
26 “Terminal patient”[tw] OR “Terminal patients”[tw] OR “Terminal illness”[tw] OR  
27 “Terminal illnesses”[tw] OR “Terminally ill”[tw] OR “Dying patient”[tw] OR “Dying  
28 patients”[tw] OR “Chronic patient”[tw] OR “Chronic patients”[tw] OR “Chronic  
29 illness”[tw] OR “Chronic illnesses”[tw] OR “Chronic care”[tw] OR “Palliative home  
30 care”[tw] OR “Home based care”[tw] OR “Home care”[tw] OR “Home based palliative  
31 care”[tw] OR “Home palliative care”[tw] OR “Home palliation”[tw] OR “Palliative care  
32 team”[tw] OR “Palliative care teams”[tw] OR “Palliative care service”[tw] OR  
33 “Palliative care services”[tw] OR “Palliative service”[tw] OR “Palliative services”[tw]  
34 OR “Palliative specialist”[tw] OR “Palliative specialists”[tw] OR “Palliative  
35 physician”[tw] OR “Palliative physicians”[tw] OR “Palliative care physician”[tw] OR  
36 “Palliative care physicians”[tw] OR “Palliative doctor”[tw] OR “Palliative doctors”[tw]  
37 OR “Palliative care doctor”[tw] OR “Palliative care doctors”[tw] OR “Palliative care  
38 giver”[tw] OR “Palliative caregiver”[tw] OR “Palliative care givers”[tw] OR “Palliative  
39 caregivers”[tw] OR “Advance care plan”[tw] OR “Advance care planning”[tw] OR  
40  
41  
42  
43  
44  
45  
46  
47  
48  
49  
50  
51  
52  
53  
54  
55  
56  
57  
58  
59  
60

1  
2  
3 “Advanced disease”[tw] OR “Advanced diseases”[tw] OR “Prehospital palliative  
4 care”[tw] OR “Out of hospital palliative care”[tw] OR “Palliative care”[mh] OR  
5 “Hospice and palliative care nursing”[mh] OR “Palliative medicine”[mh]) AND  
6 (“Emergency medical services”[tw] OR “EMS”[tw] OR “EMS staff”[tw] OR “EMS  
7 system”[tw] OR “Emergency medical system”[tw] OR “Emergency medical services  
8 system”[tw] OR “Emergency medical service system”[tw] OR “Emergency medical  
9 service protocol”[tw] OR “Emergency medical services protocol”[tw] OR “Emergency  
10 medical service protocols”[tw] OR “Emergency medical services protocols”[tw] OR  
11 “EMS protocol”[tw] OR “EMS protocols”[tw] OR “Emergency medical service”[tw] OR  
12 “Emergency health service”[tw] OR “Emergency health services”[tw] OR “Emergency  
13 services”[tw] OR “Emergency care”[tw] OR “Emergency medical care”[tw] OR  
14 “Emergency healthcare”[tw] OR “Emergency treatment”[tw] OR “Emergency  
15 treatments”[tw] OR “Emergency medical treatment”[tw] OR “Emergency  
16 management”[tw] OR “Emergency medical management”[tw] OR “Out of hospital  
17 emergency care”[tw] OR “Prehospital care”[tw] OR “Prehospital emergency care”[tw]  
18 OR “Pre hospital”[tw] OR “Prehospital”[tw] OR “Out of hospital”[tw] OR “Out-of-  
19 hospital”[tw] OR “Paramedic”[tw] OR “Paramedics”[tw] OR “Emergency  
20 paramedic”[tw] OR “Emergency paramedics”[tw] OR “Ambulance”[tw] OR  
21 “Ambulances”[tw] OR “Ambulance staff”[tw] OR “Emergency medical provider”[tw]  
22 OR “Emergency medical providers”[tw] OR “Emergency medical technician”[tw] OR  
23 “Emergency medical technicians”[tw] OR “Emergency medical practitioner”[tw] OR  
24 “Emergency medical practitioners”[tw] OR “Emergency provider”[tw] OR “Emergency  
25 providers”[tw] OR “Emergency technician”[tw] OR “Emergency technicians”[tw] OR  
26 “Emergency practitioner”[tw] OR “Emergency practitioners”[tw] OR “Prehospital  
27 emergency provider”[tw] OR “Prehospital emergency providers”[tw] OR “Emergency  
28 responder”[tw] OR “Emergency responders”[tw] OR “First responder”[tw] OR “First  
29 responders”[tw] OR “Emergency doctor”[tw] OR “Emergency doctors”[tw] OR  
30 “Emergency medical doctor”[tw] OR “Emergency medical doctors”[tw] OR  
31 “Emergency physician”[tw] OR “Emergency physicians”[tw] OR “Emergency medical  
32 physician”[tw] OR “Emergency medical physicians”[tw] OR “Emergency clinician”[tw]  
33 OR “Emergency clinicians”[tw] OR “Emergency medical clinician”[tw] OR  
34 “Emergency medical clinicians”[tw] OR “Emergency medical staff”[tw] OR  
35 “Emergency medical personnel”[tw] OR “Transfer”[tw] OR “Transfers”[tw] OR  
36 “Interhospital transfer”[tw] OR “Interhospital transfers”[tw] OR “Home transfer”[tw]  
37  
38  
39  
40  
41  
42  
43  
44  
45  
46  
47  
48  
49  
50  
51  
52  
53  
54  
55  
56  
57  
58  
59  
60

1  
2  
3 OR "Transfer home"[tw] OR "Emergency medical team"[tw] OR "Emergency medical  
4 teams"[tw] OR "Emergency medical technicians"[mh] OR "Ambulances"[mh] OR  
5 "Emergency medical services"[mh])  
6  
7  
8  
9

### 10 11 Web of Science Search String

12  
13 (TS=((  
14 "Palliative" OR "Palliative care" OR "Palliative medicine" OR "Palliative  
15 management" OR "Palliative nursing" OR "Palliative care nursing" OR "Palliative care  
16 nurse" OR "Palliative care nurses" OR "Palliative patient" OR "Palliative patients" OR  
17 "Palliation" OR "Palliative situation" OR "Palliative situations" OR "Palliative  
18 emergency" OR "Palliative emergencies" OR "Palliative care protocol" OR "Palliative  
19 care protocols" OR "Emergency palliative care" OR "Emergency palliation" OR "Early  
20 palliation" OR "Early palliative care" OR "Early hospice care" OR "Palliative unit" OR  
21 "Palliative units" OR "Palliative care unit" OR "Palliative care units" OR "Hospice  
22 care" OR "Hospice" OR "Hospice and palliative care nursing" OR "Hospice and  
23 palliative nursing" OR "Hospice and palliation" OR "Hospice nurse" OR "Hospice  
24 nurses" OR "Hospice physician" OR "Hospice physicians" OR "Hospice service" OR  
25 "Hospice services" OR "End of life care" OR "End of life" OR "Terminal care" OR  
26 "Terminal patient" OR "Terminal patients" OR "Terminal illness" OR "Terminal  
27 illnesses" OR "Terminally ill" OR "Dying patient" OR "Dying patients" OR "Chronic  
28 patient" OR "Chronic patients" OR "Chronic illness" OR "Chronic illnesses" OR  
29 "Chronic care" OR "Palliative home care" OR "Home based care" OR "Home care"  
30 OR "Home based palliative care" OR "Home palliative care" OR "Home palliation"  
31 OR "Palliative care team" OR "Palliative care teams" OR "Palliative care service" OR  
32 "Palliative care services" OR "Palliative service" OR "Palliative services" OR  
33 "Palliative specialist" OR "Palliative specialists" OR "Palliative physician" OR  
34 "Palliative physicians" OR "Palliative care physician" OR "Palliative care physicians"  
35 OR "Palliative doctor" OR "Palliative doctors" OR "Palliative care doctor" OR  
36 "Palliative care doctors" OR "Palliative care giver" OR "Palliative caregiver" OR  
37 "Palliative care givers" OR "Palliative caregivers" OR "Advance care plan" OR  
38 "Advance care planning" OR "Advanced disease" OR "Advanced diseases" OR  
39 "Prehospital palliative care" OR "Out of hospital palliative care") ) AND  
40  
41  
42  
43  
44  
45  
46  
47  
48  
49  
50  
51  
52  
53  
54  
55  
56  
57  
58  
59  
60  
60 TS=((  
"Emergency medical services" OR "EMS" OR "EMS staff" OR "EMS system"

1  
2  
3 OR "Emergency medical system" OR "Emergency medical services system" OR  
4 "Emergency medical service system" OR "Emergency medical service protocol" OR  
5 "Emergency medical services protocol" OR "Emergency medical service protocols"  
6 OR "Emergency medical services protocols" OR "EMS protocol" OR "EMS protocols"  
7 OR "Emergency medical service" OR "Emergency health service" OR "Emergency  
8 health services" OR "Emergency services" OR "Emergency care" OR "Emergency  
9 medical care" OR "Emergency healthcare" OR "Emergency treatment" OR  
10 "Emergency treatments" OR "Emergency medical treatment" OR "Emergency  
11 management" OR "Emergency medical management" OR "Out of hospital  
12 emergency care" OR "Prehospital care" OR "Prehospital emergency care" OR "Pre  
13 hospital" OR "Prehospital" OR "Out of hospital" OR "Out-of-hospital" OR "Paramedic"  
14 OR "Paramedics" OR "Emergency paramedic" OR "Emergency paramedics" OR  
15 "Ambulance" OR "Ambulances" OR "Ambulance staff" OR "Emergency medical  
16 provider" OR "Emergency medical providers" OR "Emergency medical technician"  
17 OR "Emergency medical technicians" OR "Emergency medical practitioner" OR  
18 "Emergency medical practitioners" OR "Emergency provider" OR "Emergency  
19 providers" OR "Emergency technician" OR "Emergency technicians" OR "Emergency  
20 practitioner" OR "Emergency practitioners" OR "Prehospital emergency provider" OR  
21 "Prehospital emergency providers" OR "Emergency responder" OR "Emergency  
22 responders" OR "First responder" OR "First responders" OR "Emergency doctor" OR  
23 "Emergency doctors" OR "Emergency medical doctor" OR "Emergency medical  
24 doctors" OR "Emergency physician" OR "Emergency physicians" OR "Emergency  
25 medical physician" OR "Emergency medical physicians" OR "Emergency clinician"  
26 OR "Emergency clinicians" OR "Emergency medical clinician" OR "Emergency  
27 medical clinicians" OR "Emergency medical staff" OR "Emergency medical  
28 personnel" OR "Transfer" OR "Transfers" OR "Interhospital transfer" OR  
29 "Interhospital transfers" OR "Home transfer" OR "Transfer home" OR "Emergency  
30 medical team" OR "Emergency medical teams"))  
31  
32  
33  
34  
35  
36  
37  
38  
39  
40  
41  
42  
43  
44  
45  
46  
47  
48  
49  
50  
51  
52  
53  
54  
55  
56  
57  
58  
59  
60



**Table 1 – Summary of Included Studies**

| Author, Year, Setting, Country Income Status | Aim(s)                                                                                                                                                                                                         | Methodology                       | Population and Sample Size | Outcomes and Significant Findings                                                                                                                                                                                                                       | Limitations                                                                                                                                              |
|----------------------------------------------|----------------------------------------------------------------------------------------------------------------------------------------------------------------------------------------------------------------|-----------------------------------|----------------------------|---------------------------------------------------------------------------------------------------------------------------------------------------------------------------------------------------------------------------------------------------------|----------------------------------------------------------------------------------------------------------------------------------------------------------|
| Anderson, et al. 2022<br>New Zealand - HIC   | <i>“To explore bereaved family members’ experiences of emergency ambulance care at the end of life.”</i>                                                                                                       | Qualitative Individual Interviews | 38 Family Caregivers       | Key themes: 1) Supporting living and dying at home. 2) Urgent and unexpected events. 3) Reluctance in calling an ambulance. EMS providers play a vital role in providing palliative care. This should be integrated into policy, practice and training. | Possibility of self-selection and recall biases. Limited external validity.                                                                              |
| Ausband, et al. 2002<br>USA - HIC            | <i>“To determine the prevalence of palliative care protocols among EMS agencies in the United States, and to estimate the percentage of the U.S. population covered by such protocols”.</i>                    | Descriptive Survey                | 121 EMS Agencies           | 5.8% of EMS Agencies have palliative care protocols. Thus, there is a lack of EMS palliative care protocols in the USA.                                                                                                                                 | Response rate 60.5%. ‘Palliative Care Protocol’ was not defined. Thus, EMS palliative care protocols may be more or less prevalent than 5.8%.            |
| Boaventura, et al. 2022<br>Brazil - LMIC     | <i>“To identify the perception of health professionals regarding the concept of PC [Palliative Care] and their care experiences with this type of patient in a pre-hospital care (PHC) service in Brazil.”</i> | Qualitative Individual Interviews | 25 EMS Providers           | Key themes: 1) Unpreparedness of the team. 2) Decision Making. 3) Dysthanasia. There is a need for EMS provider palliative care training and policy development in Brazil.                                                                              | Possibility of self-selection and recall biases. Limited external validity.                                                                              |
| Breyre, et al. 2021<br>USA - HIC             | <i>“To provide a descriptive analysis of hospice and comfort care patient EMS utilization in Alameda County [California, USA]”.</i>                                                                            | Retrospective Cohort              | 534 Patient Records        | 0.2% (n=534) of EMS calls were for hospice patients. Of these, 468 (87.6%) were transported to hospital. Most commonly encountered symptoms: respiratory distress, altered mental status. Fentanyl                                                      | Some hospice patients potentially missed due to incomplete/inaccurate documentation and an inability to identify serial EMS calls from a single patient. |

|                                        |                                                                                                                                                                                                   |                                   |                  |                                                                                                                                                                                                                                                                                                                                                                                                |                                                                                                                                                                                                                                    |
|----------------------------------------|---------------------------------------------------------------------------------------------------------------------------------------------------------------------------------------------------|-----------------------------------|------------------|------------------------------------------------------------------------------------------------------------------------------------------------------------------------------------------------------------------------------------------------------------------------------------------------------------------------------------------------------------------------------------------------|------------------------------------------------------------------------------------------------------------------------------------------------------------------------------------------------------------------------------------|
|                                        |                                                                                                                                                                                                   |                                   |                  | administration was the most common intervention. Although EMS encountered hospice patients infrequently, they should be prepared for such cases.                                                                                                                                                                                                                                               |                                                                                                                                                                                                                                    |
| Breyre, et al.<br>2021<br>USA - HIC    | <i>"To evaluate the effect of a Mobile Integrated Hospice Healthcare (MIHH) program including hospice education and expansion of paramedic scope of practice to use hospice medication kits".</i> | Retrospective Cohort              | 523 MIHH Cases   | MIHH program reduced emergency department transport rates from 80.3% to 19.6%. The expanded scope medication kit was used only once. This collaboration between hospice and EMS systems was successful in reducing hospice patient transport to the emergency department, possibly improving hospice patient and family care.                                                                  | No comparison with transport rates in non-hospice patients over the study period. Reasons for patient transport inconsistently documented. Method of screening for hospice patients may not have identified all eligible patients. |
| Breyre, et al.<br>2022<br>USA - HIC    | <i>"To explore EMS provider challenges, self-perceived roles and training experiences caring for patients and families with life-limiting illness."</i>                                           | Qualitative Individual Interviews | 15 EMS Providers | Key themes: 1) In the moment decision making dilemmas. 2) Respond to varied grief reactions. 3) Disadvantaged/vulnerable populations have less access to care and advance care planning. 4) Transport people. 5) Holistic care. 6) Lack of formal training. Formal training of EMS providers in palliative care principles would empower them to care for patients with life-limiting illness. | Possibility of self-selection and recall biases. Limited external validity.                                                                                                                                                        |
| Burnod, et al.<br>2012<br>France - HIC | <i>"To evaluate whether patient's wishes were respected by prehospital emergency medical teams after implementing</i>                                                                             | Retrospective Cohort              | 40 Patients      | Collaboration between prehospital emergency teams and palliative care networks allows prehospital teams to access information relevant to                                                                                                                                                                                                                                                      | No limitations listed by the authors; however, the sample size was small.                                                                                                                                                          |

1  
2  
3  
4  
5  
6  
7  
8  
9  
10  
11  
12  
13  
14  
15  
16  
17  
18  
19  
20  
21  
22  
23  
24  
25  
26  
27  
28  
29  
30  
31  
32  
33  
34  
35  
36  
37  
38  
39  
40  
41  
42  
43  
44  
45  
46

|                                          |                                                                                                                                                                                                                                                                                                                                       |                                    |                                                                                                                                             |                                                                                                                                                                                                                                                                                                                                                                                                              |                                                                                                     |
|------------------------------------------|---------------------------------------------------------------------------------------------------------------------------------------------------------------------------------------------------------------------------------------------------------------------------------------------------------------------------------------|------------------------------------|---------------------------------------------------------------------------------------------------------------------------------------------|--------------------------------------------------------------------------------------------------------------------------------------------------------------------------------------------------------------------------------------------------------------------------------------------------------------------------------------------------------------------------------------------------------------|-----------------------------------------------------------------------------------------------------|
|                                          | <i>collaboration and a standardized process between a community-based palliative network and the Emergency Medical Service (EMS) system”.</i>                                                                                                                                                                                         |                                    |                                                                                                                                             | their patients and results in greater respect of palliative patient wishes (83% of the time compared with 40% where no collaboration exists).                                                                                                                                                                                                                                                                |                                                                                                     |
| Carron, et al. 2014<br>Switzerland - HIC | To highlight “end of-life and palliative care situations that may be encountered by prehospital emergency services”.                                                                                                                                                                                                                  | Retrospective Case Series          | 4 Cases                                                                                                                                     | Palliative and prehospital emergency care may be complimentary approaches. Analysed cases demonstrate the need for palliative education in prehospital emergency teams and collaboration between EMS and palliative systems.                                                                                                                                                                                 | Limited review of 4 cases. Findings and suggestions are open to biased interpretations.             |
| Carter, et al. 2022<br>Canada - HIC      | “To describe the essential elements, barriers, and facilitators for implementation, spread, and scale of the Program [Paramedics Providing Palliative Care at Home] from two perspectives: one system that implemented the Program and one system that had not, using the Consolidated Framework for Implementation Research (CFIR).” | Qualitative Deliberative Dialogues | 20 stakeholders (9 EMS Providers, 7 Palliative Providers, 2 Program Administrators, 1 Primary Care Provider, 1 Emergency Medicine Provider) | Key elements for implementation of the <i>Paramedics Providing Palliative Care at Home Program</i> : 1) Cosmopolitanism (outer setting). 2) Adaptability (intervention). 3) Implementation climate (inner setting). 4) Engagement and Planning (processes). Scaling this program would be beneficial for patient satisfaction and further paramedic confidence in caring for patients with palliative needs. | Possibility of self-selection and group biases. Lack of member-checking. Limited external validity. |
| Carter, et al. 2022<br>Canada - HIC      | “To explore, from the perspectives of paramedics and palliative health care providers, the alignment of a palliative care role with paramedic professional identity.”                                                                                                                                                                 | Qualitative Focus Group Interviews | 11 Paramedics, 20 Health Care Providers                                                                                                     | Key themes concerning EMS provider role: 1) Patient centeredness and job satisfaction. 2) Bridging. 3) Advocate and educator. 4) Psychosocial support. Key themes concerning EMS provider                                                                                                                                                                                                                    | Possibility of self-selection and group biases. Limited external validity.                          |

|                                        |                                                                                                                                                                                                                                                                             |                                                                                                        |                                                                                                                                                                 |                                                                                                                                                                                                                                                                                                                                 |                                                                                                                     |
|----------------------------------------|-----------------------------------------------------------------------------------------------------------------------------------------------------------------------------------------------------------------------------------------------------------------------------|--------------------------------------------------------------------------------------------------------|-----------------------------------------------------------------------------------------------------------------------------------------------------------------|---------------------------------------------------------------------------------------------------------------------------------------------------------------------------------------------------------------------------------------------------------------------------------------------------------------------------------|---------------------------------------------------------------------------------------------------------------------|
|                                        |                                                                                                                                                                                                                                                                             |                                                                                                        |                                                                                                                                                                 | identity: 1) Evolution of paramedicine as a skilled clinical profession. 2) Helping people and communities. 3) Paramedic skill set aligns with work in palliative care. 4) Changing paramedic mindset. Palliative care provision is well-aligned with EMS provider identity.                                                    |                                                                                                                     |
| Carter, et al.<br>2019<br>Canada - HIC | <i>"To determine the impact of the program [Paramedics Providing Palliative Care at Home] in two parts: Part A examined patient and family/caregiver satisfaction, and Part B measured paramedic comfort and confidence with the delivery of palliative care support"</i> . | Mixed Methods:<br>Part A: Telephonic Interviews, Surveys. Part B: Pre- vs. Post- Intervention Surveys. | Part A (Patients/Families): 18 Telephonic Interviews and 67 surveys.<br>Part B (Paramedics ): 235 Pre- Intervention Surveys and 267 Post- Intervention Surveys. | After programme implementation, paramedic comfort and confidence providing palliative and end-of-life care improved. Paramedics viewed palliative care as important and rewarding in their work. Furthermore, patient/family satisfaction was high. Families particularly highlighted paramedic compassion and professionalism. | Small sample size and low survey response rates. Time-lapse between paramedic arrival and patient/family interview. |
| Clemency, et al.<br>2019<br>USA - HIC  | To <i>"describe a terminal extubation performed by a paramedic under the direct supervision of an Emergency Medical Services (EMS) physician"</i> .                                                                                                                         | Case Report                                                                                            | 1 Case                                                                                                                                                          | With guidance, terminal extubation is possible out-of-hospital. Allowing for EMS involvement in this and other palliative interventions would simplify logistics and allow patients the option of a home death.                                                                                                                 | Single case description.                                                                                            |
| Dent, et al.<br>2020<br>UK - HIC       | To <i>"report the patient characteristics and outcomes of a</i>                                                                                                                                                                                                             | Retrospective Cohort                                                                                   | 45 Telephonic Calls                                                                                                                                             | Telephonic advice service was associated with low rates of patient transport to hospital (16%,                                                                                                                                                                                                                                  | Quality of advice not studied. Small sample size in a paramedic-led system                                          |

1  
2  
3  
4  
5  
6  
7  
8  
9  
10  
11  
12  
13  
14  
15  
16  
17  
18  
19  
20  
21  
22  
23  
24  
25  
26  
27  
28  
29  
30  
31  
32  
33  
34  
35  
36  
37  
38  
39  
40  
41  
42  
43  
44  
45  
46

|                                      |                                                                                                                                                                                 |                                      |                         |                                                                                                                                                                                                                                                                                                                                                             |                                                                                                                                             |
|--------------------------------------|---------------------------------------------------------------------------------------------------------------------------------------------------------------------------------|--------------------------------------|-------------------------|-------------------------------------------------------------------------------------------------------------------------------------------------------------------------------------------------------------------------------------------------------------------------------------------------------------------------------------------------------------|---------------------------------------------------------------------------------------------------------------------------------------------|
|                                      | <i>24-hour hospice nursing telephone advice service to support an ambulance service”.</i>                                                                                       |                                      |                         | n=7). Access to palliative advice can support ambulance clinicians and is feasible. Ambulance clinicians viewed this as an invaluable resource.                                                                                                                                                                                                             | limiting external validity. Telephonic advice may not have been sought in all cases as EMS do not have a palliative care call-out category. |
| Donnelly, et al. 2018 USA - HIC      | <i>“To assess the knowledge, attitudes, and experiences of EMS providers in the hospice care setting”.</i>                                                                      | Mixed Methods Cross-Sectional Survey | 182 EMS Providers       | Majority of EMS providers (84.1%, n=153) have managed a hospice patient at least once. 29.1% (n=53) reported receiving formal education on hospice patient care. EMS providers expressed a need for education and difficulties with communication and information in managing hospice patients.                                                             | Single-centre study, limiting external validity. Unvalidated survey.                                                                        |
| Eaton-Williams, et al. 2020 UK - HIC | <i>“To assess whether ambulance paramedics currently identify EoLC patients, are aware of identification guidance and believe this role is appropriate for their practice”.</i> | Cross-Sectional Online Survey        | 1643 Paramedics         | Majority of paramedics (97.0%, n=1594) felt they should contribute to identifying end-of-life care needs. Current barriers to this role: lack of access to patient medical records, insufficient education and communication difficulties. Establishing end-of-life referral pathways and receiving education were identified as facilitators of this role. | Possibility of self-selection bias. Impossible to verify participants’ qualifications and experience.                                       |
| Fitzpatrick, et al. 2022 USA - HIC   | <i>“To provide structured, evidence-based palliative and hospice education to CPs [Community Paramedics].”</i>                                                                  | Pre- and Post-intervention Study     | 14 Community Paramedics | Paramedics play a role in the care of terminal patients. Formal palliative training within community paramedic programs should be implemented. The educational intervention of this                                                                                                                                                                         | Small sample size. Unclear survey questions.                                                                                                |

|                                             |                                                                                                                                                                                                                                       |                                   |                                                                                                                                           |                                                                                                                                                                                                                                                                                                                                    |                                                                             |
|---------------------------------------------|---------------------------------------------------------------------------------------------------------------------------------------------------------------------------------------------------------------------------------------|-----------------------------------|-------------------------------------------------------------------------------------------------------------------------------------------|------------------------------------------------------------------------------------------------------------------------------------------------------------------------------------------------------------------------------------------------------------------------------------------------------------------------------------|-----------------------------------------------------------------------------|
|                                             |                                                                                                                                                                                                                                       |                                   |                                                                                                                                           | study increased community paramedics' knowledge regarding EoL communication.                                                                                                                                                                                                                                                       |                                                                             |
| Gage, et al.<br>2020<br>South Africa - LMIC | <i>"To gather the perspectives of advanced life support (ALS) providers within the South African private EMS sector regarding pre-hospital palliative care in terms of its importance, feasibility and barriers to its practice."</i> | Qualitative Individual Interviews | 6 Paramedics                                                                                                                              | Key themes: 1) Need for pre-hospital palliative care. 2) Function of pre-hospital healthcare providers concerning palliative care. 3) Challenges to pre-hospital palliative care. 4) Ideas for implementing pre-hospital palliative care. Pre-hospital palliative care is needed in South Africa and EMS may play a valuable role. | Possibility of self-selection bias. Limited external validity.              |
| Goodwin, et al.<br>2021<br>UK - HIC         | <i>"To explore staff stakeholder views on the role of UK paramedics in advance care planning, including the use of the Gold Standards Framework Proactive Identification Guidance for screening and referral of patients"</i> .       | Qualitative Individual Interviews | 17 Stakeholders (8 Paramedics, 4 General Practitioners, 2 Emergency Department Doctors, 2 Emergency Department Nurses, 1 Community Nurse) | Key themes: 1) A lack of advance care planning. 2) Variation across health conditions. 3) A lack of joined-up care. 4) Poor-quality end of life conversations. UK paramedics are well positioned to screen patients for advance care planning.                                                                                     | Possibility of self-selection and recall biases. Limited external validity. |
| Hauch, et al.<br>2021<br>Germany - HIC      | To answer the questions: <i>"Which EMS operations occurred in the patients cared for in the SPHC [Specialized Home Palliative Care], and how frequent were they?"</i>                                                                 | Retrospective Cohort              | 172 Paediatric Patient Records                                                                                                            | Despite existence of a 24/7 specialised palliative home care service, some parents of children with palliative needs still contacted EMS in emergency situations (12%, n=20). Within                                                                                                                                               | Small sample size. Limited external validity.                               |

|                                          |                                                                                                                                                                                                                                                                          |                                         |                         |                                                                                                                                                                                                                                                                                                                                                                                        |                                                                                                                                                     |
|------------------------------------------|--------------------------------------------------------------------------------------------------------------------------------------------------------------------------------------------------------------------------------------------------------------------------|-----------------------------------------|-------------------------|----------------------------------------------------------------------------------------------------------------------------------------------------------------------------------------------------------------------------------------------------------------------------------------------------------------------------------------------------------------------------------------|-----------------------------------------------------------------------------------------------------------------------------------------------------|
|                                          | <i>What treatments were given, and what was the outcome? Which possible associated factors can be identified that triggered the emergency call?"</i>                                                                                                                     |                                         |                         | this group, EMS were contacted 27 times. These patients were less likely to have a do not resuscitate order, required more home visits and were under SPHC care for longer when compared to the non-EMS group. Collaboration between palliative and emergency services is needed.                                                                                                      |                                                                                                                                                     |
| Hoare, et al.<br>2018<br>UK - HIC        | <i>"To understand the role of ambulance staff in the admission to hospital of patients close to the end of life".</i>                                                                                                                                                    | Qualitative<br>Individual<br>Interviews | 6<br>Ambulance<br>Staff | Ambulance staff play an important role in end-of-life patient hospital admissions. Their ability to keep patients at home is hindered by: 1) The limited availability and accessibility of additional care support in the community. 2) The limited information ambulance staff had about the patient and their condition. 3) A perceived ambulance service emphasis on hospital care. | Possibility of self-selection and recall biases. Limited external validity.                                                                         |
| James, et al.<br>2021<br>Australia - HIC | <i>"To understand paramedics' intentions to use a hypothetical Specialist Palliative Care telehealth service, based on their perceptions of the service (i.e. usefulness, ease of use, and attitude toward to the service) and their palliative care self-efficacy".</i> | Descriptive<br>Online<br>Survey         | 112<br>Paramedics       | All variables were positively correlated with an intention to use a Specialist Palliative Care telehealth service apart from age and palliative care self-efficacy, which was negatively correlated. Thus, paramedics displayed a desire to use the service despite high palliative care self-efficacy ratings.                                                                        | Possibility of self-selection bias. Desirability/positivity bias in that attitudes are often positive to new technology in a hypothetical scenario. |

|                                                      |                                                                                                                                                                                                                             |                                                             |                                         |                                                                                                                                                                                                                                                                                                                                                                                                                                                      |                                                                                                                           |
|------------------------------------------------------|-----------------------------------------------------------------------------------------------------------------------------------------------------------------------------------------------------------------------------|-------------------------------------------------------------|-----------------------------------------|------------------------------------------------------------------------------------------------------------------------------------------------------------------------------------------------------------------------------------------------------------------------------------------------------------------------------------------------------------------------------------------------------------------------------------------------------|---------------------------------------------------------------------------------------------------------------------------|
| <p>Juhrmann, et al.<br/>2022<br/>Australia - HIC</p> | <p><i>“To examine the quality and content of existing Australian palliative paramedicine guidelines with a sample of guidelines from comparable Anglo-American ambulance services.”</i></p>                                 | <p>Guideline Quality Appraisal and Qualitative Analysis</p> | <p>8 Palliative Care EMS Guidelines</p> | <p>Overall, guideline quality was poor to moderate according to the AGREE II instrument, however, this does not refer to clinical validity. Key themes from guideline analysis: 1) Audience and approach. 2) Communication is key. 3) Assessing and managing symptoms. 4) Looking beyond pharmaceuticals. 5) Seeking support. 6) Care after death.</p>                                                                                               | <p>Potentially relevant information may have been missed as EMS guidelines not palliative/EoL specific were excluded.</p> |
| <p>Juhrmann, et al.<br/>2021<br/>Australia - HIC</p> | <p><i>“To review and synthesise the empirical evidence regarding paramedics delivering palliative and end-of-life care in community based settings.”</i></p>                                                                | <p>Systematic Literature Review</p>                         | <p>23 Articles</p>                      | <p>Key themes: 1) Broadening the traditional role. 2) Understanding patient wishes. 3) Supporting families. Paramedics can play an important role in facilitating home-based death and reducing unnecessary hospital admissions.</p>                                                                                                                                                                                                                 | <p>Selected articles limited to English. Some relevant articles potentially omitted.</p>                                  |
| <p>Kamphausen, et al.<br/>2019<br/>Germany - HIC</p> | <p><i>“To investigate challenges faced by emergency physicians (EPs) who provide prehospital emergency care to patients with advanced incurable diseases and family caregivers in their familiar home environment”.</i></p> | <p>Qualitative Individual Interviews</p>                    | <p>24 Emergency Physicians</p>          | <p>Key themes: 1) Structural conditions of prehospital emergency care. 2) Medical documentation and orders. 3) Finding optimal and patient-centred therapy. 4) Uncertainty about legal consequences. 5) Challenges at the individual (EP) level. 6) Challenges at the emergency team level. 7) Family caregiver’s emotions, coping, and understanding of patient’s illness. 8) Patient’s wishes, coping, and understanding of patient’s illness.</p> | <p>Possibility of self-selection and recall biases. Limited external validity.</p>                                        |



|                                       |                                                                                                                                                                                                                                                                                                                                                                                |                                                                      |                                                                                  |                                                                                                                                                                                                                                                                                                   |                                                                                                                  |
|---------------------------------------|--------------------------------------------------------------------------------------------------------------------------------------------------------------------------------------------------------------------------------------------------------------------------------------------------------------------------------------------------------------------------------|----------------------------------------------------------------------|----------------------------------------------------------------------------------|---------------------------------------------------------------------------------------------------------------------------------------------------------------------------------------------------------------------------------------------------------------------------------------------------|------------------------------------------------------------------------------------------------------------------|
|                                       |                                                                                                                                                                                                                                                                                                                                                                                |                                                                      |                                                                                  | 9) Social, cultural, and religious background of patients and families.                                                                                                                                                                                                                           |                                                                                                                  |
| Knighting, et al. 2017<br>UK - HIC    | To answer the questions, “do paramedics view end-of-life care as a key part of their role and are they confident in managing this aspect of their clinical practice? Further to this, what are the underlying concerns of paramedics when managing end-of-life care”?                                                                                                          | Descriptive Online Survey                                            | 182 Paramedics                                                                   | Paramedics saw end-of-life care as essential to their function. Fear of litigation and conflict with patient family members were identified as challenges in palliative care provision. Education is needed for paramedic confidence.                                                             | Impossible to verify participants' experience and qualifications. Low response rate.                             |
| Lamba, et al. 2013<br>USA - HIC       | “To 1) review four case scenarios that relate to palliative care and may be commonly encountered in the out-of-hospital setting and 2) provide a road map by suggesting four things to do to start an EMS-palliative care initiative in order to optimize out-of-hospital care of the seriously ill and increase preparedness of EMS providers in these difficult situations”. | Collaborative Plan of Action (IPAL-EM project) with Case Discussions | Plan of action to integrate palliative and prehospital care. 4 Case Discussions. | Four steps to begin an EMS-palliative initiative: 1) Identify EMS ‘champions’. 2) Review protocols and literature. 3) Needs assessment. 4) Create action plan. Ideally, palliative care begins out-of-hospital. This study represents a guideline for the integration of palliative and EMS care. | Requires implementation in various settings as well as study to determine effectiveness. Limited case review.    |
| Leibold, et al. 2018<br>Germany - HIC | “To determine whether or not a paramedic's decision-making in end-of-life situations is influenced by his/her religious beliefs, how they decide given the current judicial framework, and how they would decide were there legal certainty”.                                                                                                                                  | Descriptive Online Survey                                            | 429 Paramedics                                                                   | Religious beliefs play a role in influencing paramedic decision-making, however, experience, background, special training and legal framework conditions, appear to have greater influence.                                                                                                       | Possibility of self-selection bias. Unvalidated survey. Limited religions and beliefs represented across sample. |

|                                                                            |                                                |                                                                                                                                                                                                                                                                                                                                     |                                            |                                                        |                                                                                                                                                                                                                                                                                                                                                      |                                                                                                                     |
|----------------------------------------------------------------------------|------------------------------------------------|-------------------------------------------------------------------------------------------------------------------------------------------------------------------------------------------------------------------------------------------------------------------------------------------------------------------------------------|--------------------------------------------|--------------------------------------------------------|------------------------------------------------------------------------------------------------------------------------------------------------------------------------------------------------------------------------------------------------------------------------------------------------------------------------------------------------------|---------------------------------------------------------------------------------------------------------------------|
| 1<br>2<br>3<br>4<br>5<br>6<br>7<br>8<br>9<br>10<br>11<br>12<br>13          | Lord, et al.<br>2019<br>Australia - HIC        | <i>“To describe the incidence and nature of cases attended by paramedics and the care provided where the reason for attendance was associated with a history of palliative care”.</i>                                                                                                                                               | Retrospective Cohort                       | 4348 Patient Records                                   | Identified cases were 0.5% of caseload during study period. Most common assessments by paramedics were ‘respiratory’ (20.1%), ‘pain’ (15.8%) and ‘deceased’ (7.9%). Majority of patients were transported (74.4%, n=3237) with hospital the most prevalent destination (99.5%, n=3221).                                                              | Emergencies and reasons for paramedic calls may have been unrelated to palliative condition.                        |
| 14<br>15<br>16<br>17<br>18<br>19<br>20<br>21                               | Lord, et al.<br>2012<br>Australia - HIC        | <i>“To identify paramedics’ knowledge, beliefs, and attitudes related to the care of patients requiring palliative care in community health settings”.</i>                                                                                                                                                                          | Qualitative Focus Group Interviews         | 3 focus group interviews with a total of 26 paramedics | Key themes: conflict in care goals, legal problems, lack of information, system problems. Further research suggested for education, guidelines and defining roles of paramedics in palliative care patient management.                                                                                                                               | Low response rate possibly resulting in an unrepresentative sample. Possibility of self-selection and group biases. |
| 22<br>23<br>24<br>25<br>26<br>27<br>28<br>29<br>30<br>31<br>32<br>33<br>34 | McCormick, et al.<br>2019<br>New Zealand - HIC | <i>“To understand the role New Zealand paramedics have as providers of community and pre-hospital palliative and EOL care, as well as to ascertain whether paramedics are suitably equipped and educated to provide quality palliative care to an increasingly elderly population with non-curable life-threatening illnesses”.</i> | Rapid Literature Review                    | 4 Articles                                             | No New Zealand articles or guidelines were found. New Zealand Ministry of Health documents provide minimal reference to pre-hospital emergency medical providers. Paramedics already provide palliative and end-of-life care. They are willing to continue this provision, with improved education and better integration with other care providers. | Small sample of articles. Two databases searched. Lack of quality appraisal.                                        |
| 35<br>36<br>37<br>38<br>39<br>40<br>41<br>42<br>43<br>44<br>45<br>46       | McGinley, et al.<br>2017<br>USA - HIC          | <i>“To describe how medical orders inform EMS providers’ decision making during emergencies involving</i>                                                                                                                                                                                                                           | Mixed-Methods: Descriptive Cross-Sectional | 239 Surveys and 48 Interviews of EMS Providers         | Many EMS providers (62.7%) had treated a patient with both an intellectual disability and medical orders directing end-of-life care. Key themes: 1) Provider                                                                                                                                                                                         | Possibility of self-selection bias. Limited external validity. Unvalidated survey.                                  |

1  
2  
3  
4  
5  
6  
7  
8  
9  
10  
11  
12  
13  
14  
15  
16  
17  
18  
19  
20  
21  
22  
23  
24  
25  
26  
27  
28  
29  
30  
31  
32  
33  
34  
35  
36  
37  
38  
39  
40  
41  
42  
43  
44  
45  
46

|                                    |                                                                                                                                                                                                                                      |                                   |                       |                                                                                                                                                                                                                                                                                                                                                                                                             |                                                                             |
|------------------------------------|--------------------------------------------------------------------------------------------------------------------------------------------------------------------------------------------------------------------------------------|-----------------------------------|-----------------------|-------------------------------------------------------------------------------------------------------------------------------------------------------------------------------------------------------------------------------------------------------------------------------------------------------------------------------------------------------------------------------------------------------------|-----------------------------------------------------------------------------|
|                                    | <i>people with intellectual disabilities who are near life's end by considering the multiple (individual, organizational, sociocultural) contexts within which these decisions occur".</i>                                           | Survey and Individual Interviews  |                       | familiarity. 2) Organizational processes. 3) Sociocultural context.                                                                                                                                                                                                                                                                                                                                         |                                                                             |
| Mott, et al. 2020 Australia - HIC  | <i>"To explore the experiences and attitudes of ambulance officers in managing pediatric patients with palliative care needs".</i>                                                                                                   | Descriptive Online Survey         | 22 Ambulance Officers | Many ambulance officers found these cases to be challenging and their confidence levels varied. They were most likely to use correspondence provided by the family as a guide for management. Half of participants felt paediatrics receiving palliative care should have a 'not for resuscitation' order. They suggested support for themselves could be improved through increased patient documentation. | Small sample size. Possibility of self-selection and recall biases.         |
| Murphy-Jones, et al. 2016 UK - HIC | <i>"To explore how paramedics make decisions when asked to transport nursing home residents nearing the end of their lives".</i>                                                                                                     | Qualitative Individual Interviews | 6 Paramedics          | Key themes: 1) The challenges in understanding patients' wishes. 2) Evaluating patients' best interests. 3) The influence of others on decision making.                                                                                                                                                                                                                                                     | Possibility of self-selection and recall biases. Limited external validity. |
| Patterson, et al. 2019 UK - HIC    | <i>To investigate "the extent to which access to, and quality of, patient information affects the care paramedics provide to patients nearing end-of-life, and their views on access to a shared electronic record as a means of</i> | Qualitative Individual Interviews | 10 Paramedics         | Key themes: 1) Access to information on patients nearing end-of-life. 2) Views on the proposed Electronic Palliative Care Coordination System (EPaCCS). Lack of access to patient information is a barrier to paramedics delivering end-of-life care. Access to EPaCCS may                                                                                                                                  | Possibility of self-selection and recall biases. Limited external validity. |

|                                               |                                                                                                                                                                                                |                                                                                                                |                                           |                                                                                                                                                                                                                                                                                                                                                                                                |                                                                                                      |
|-----------------------------------------------|------------------------------------------------------------------------------------------------------------------------------------------------------------------------------------------------|----------------------------------------------------------------------------------------------------------------|-------------------------------------------|------------------------------------------------------------------------------------------------------------------------------------------------------------------------------------------------------------------------------------------------------------------------------------------------------------------------------------------------------------------------------------------------|------------------------------------------------------------------------------------------------------|
|                                               | <i>improving the information flow around end-of-life care”.</i>                                                                                                                                |                                                                                                                |                                           | assist, but practical and technical challenges must be overcome for implementation.                                                                                                                                                                                                                                                                                                            |                                                                                                      |
| Pease, et al.<br>2019<br>UK - HIC             | To “describe the delivery, outcomes and potential impact of the Serious Illness Conversation project delivered to Welsh Ambulance Service Trust (WAST) staff”.                                 | Mixed-Methods:<br>Open-Ended Question Surveys, Pre- vs. Post- Intervention Surveys, Patient Care Record Review | 218 Paramedics and 150 Paramedic Students | Participants view themselves as playing several roles in end-of-life care: ‘facilitators’ to patient-centred and seamless care, providing support, link between services and practical help. Barriers to providing end of life care centred around communication challenges. The Serious Illness Conversation training resulted in increased participant confidence handling these situations. | Self-assessment of confidence. Review of patient care records not specific to training participants. |
| Pentaris, et al.<br>2019<br>UK - HIC          | To explore “current knowledge and evidence about paramedics’ attitudes and perceptions about end-of-life care”.                                                                                | Systematic Literature Review                                                                                   | 11 Articles                               | Key themes: 1) Critical incidents and emotional resilience. 2) Decision making. 3) Communicating death. 4) Recognising dying patients. 5) Death education. A dearth of literature exists concerning paramedics and end-of-life practice.                                                                                                                                                       | Selected articles limited to English. Some relevant articles potentially omitted.                    |
| Peran, et al.<br>2021<br>Czech Republic - HIC | To answer the question, “What is the role of ambulance EMS, EMS dispatch centres, paramedics and emergency medical physicians in the provision of palliative care to terminally ill patients”? | Scoping Literature Review                                                                                      | 31 Articles                               | Three EMS roles and one contextual factor were identified: 1) Providing complex care. 2) Adjusting patient’s trajectory. 3) Being able to make decisions in a time and information limited environment. 4) Health care professionals are insufficiently supported in palliative care.                                                                                                          | Selected articles limited to English and German. Some relevant articles potentially omitted.         |

|                                                    |                                                                                                                                                                                                                                                                                                                                 |                                           |                                       |                                                                                                                                                                                                                                                                                                                                                                                                       |                                                                            |
|----------------------------------------------------|---------------------------------------------------------------------------------------------------------------------------------------------------------------------------------------------------------------------------------------------------------------------------------------------------------------------------------|-------------------------------------------|---------------------------------------|-------------------------------------------------------------------------------------------------------------------------------------------------------------------------------------------------------------------------------------------------------------------------------------------------------------------------------------------------------------------------------------------------------|----------------------------------------------------------------------------|
| <p>Rogers, et al.<br/>2015<br/>Australia - HIC</p> | <p><i>“To identify and measure paramedics’ perspectives and educational needs regarding palliative care provision, as well as their understanding of the common causes of death”.</i></p>                                                                                                                                       | <p>Mixed Methods Survey</p>               | <p>29 Paramedics</p>                  | <p>Paramedics have a good understanding of palliative care. They particularly identified terminal cancer as requiring palliation. Paramedic education is needed in end-of-life communication practices, ethical issues and illnesses requiring palliation.</p>                                                                                                                                        | <p>Low response rate. Possibility of self-selection and recall biases.</p> |
| <p>Rosa, et al.<br/>2021<br/>Canada - HIC</p>      | <p><i>“To understand the current state of community paramedicine and palliative care”</i> in Canada.</p>                                                                                                                                                                                                                        | <p>Rapid Literature Review</p>            | <p>Unspecified Number of Articles</p> | <p>Expanded scope of community paramedic practice that provides palliative care has potential benefit in alleviating healthcare system strain while simultaneously improving patient outcomes. Pilot community paramedic palliative care programs in Canada have demonstrated the benefits of reduced emergency department visits and improved patient satisfaction with community paramedic use.</p> | <p>Small sample. Lack of quality appraisal.</p>                            |
| <p>Stone, et al.<br/>2009<br/>USA - HIC</p>        | <p><i>“To ascertain paramedics’ attitudes and beliefs about end-of-life decision-making; To measure the frequency with which practicing paramedics encounter various end-of-life situations...and the importance they assign to them; To assess the extent to which paramedics report they were trained to address end-</i></p> | <p>Descriptive Cross-Sectional Survey</p> | <p>235 Paramedics</p>                 | <p>Participants perceived end-of-life issues as important, however, they did not feel adequately trained for these situations. Most (95%) agreed that paramedics should honour advance directives. Over half (59%) felt that paramedics should honour verbal wishes to limit on-scene resuscitation. Most (95%) had previously questioned intervention appropriateness in</p>                         | <p>Small sample size. Possibility of self-selection and recall biases.</p> |

|                                       |                                                                                                                                                                                                                                       |                      |                                       |                                                                                                                                                                                                                                                                                                                                                                                                                                                                                     |                                                                                                                                       |
|---------------------------------------|---------------------------------------------------------------------------------------------------------------------------------------------------------------------------------------------------------------------------------------|----------------------|---------------------------------------|-------------------------------------------------------------------------------------------------------------------------------------------------------------------------------------------------------------------------------------------------------------------------------------------------------------------------------------------------------------------------------------------------------------------------------------------------------------------------------------|---------------------------------------------------------------------------------------------------------------------------------------|
|                                       | <i>of-life situations; To compare the importance paramedics place on end-of life issues”.</i>                                                                                                                                         |                      |                                       | terminal patients. Some (26%) reported using personal judgement to withhold or terminate resuscitation in a terminal patient.                                                                                                                                                                                                                                                                                                                                                       |                                                                                                                                       |
| Surakka, et al. 2020<br>Finland - HIC | To answer the questions, “What is the frequency, reasons and timing of paramedic visits via the end-of-life protocol and do these visits differ between the areas with and without around the clock (24/7) palliative care services”? | Retrospective Cohort | 252 Patients,<br>306 Paramedic Visits | Most frequent reasons for paramedic visits were symptom control (38%) and transportation (29%). Paramedics visited 43% and 70% of the patients in areas with and without 24/7 palliative home care services, respectively. Over half (58%) of all paramedic visits were done outside office hours. Integration of paramedics into end-of-life care at home is reasonable particularly in rural areas without around the clock palliative care services and outside of office hours. | Efficacy of paramedic management and patient/family perceptions not assessed.                                                         |
| Surakka, et al. 2022<br>Finland - HIC | “To describe experiences and educational needs of the paramedics included in the end-of-life care protocol.”                                                                                                                          | Mixed Methods Survey | 192 Paramedics                        | Over 80% of paramedics agreed the protocol helped with care for patients with palliative needs and improved EoL care quality. Patient visits were considered useful (76.5%) and EoL care meaningful (62.5%) by paramedics who expressed challenges in psychosocial aspects, communication, symptom management, and their role in EoL care. They identified symptom management                                                                                                       | Some respondents (28%) were inexperienced with the protocol. Potential for self-section and recall biases. Limited external validity. |

|                                              |                                                                                                                                                                                                                               |                                                                                                    |                                                                                                                                                                     |                                                                                                                                                                                                                                                                                                                                                                                                                          |                                                                                                                                                    |
|----------------------------------------------|-------------------------------------------------------------------------------------------------------------------------------------------------------------------------------------------------------------------------------|----------------------------------------------------------------------------------------------------|---------------------------------------------------------------------------------------------------------------------------------------------------------------------|--------------------------------------------------------------------------------------------------------------------------------------------------------------------------------------------------------------------------------------------------------------------------------------------------------------------------------------------------------------------------------------------------------------------------|----------------------------------------------------------------------------------------------------------------------------------------------------|
|                                              |                                                                                                                                                                                                                               |                                                                                                    |                                                                                                                                                                     | and communication as areas for education.                                                                                                                                                                                                                                                                                                                                                                                |                                                                                                                                                    |
| Swetenham, et al.<br>2013<br>Australia - HIC | <i>"To explore the introduction of a rapid response team as outlined in the South Australian Palliative Care Services Plan 2009–2016".</i>                                                                                    | Mixed Methods:<br>Call Log<br>Data, Patient<br>Records,<br>Surveys and<br>Individual<br>Interviews | 40 Patients<br>attended by<br>extended<br>care<br>paramedics,<br>24 Carer<br>Interviews, 2<br>Patient<br>Interviews,<br>22 Extended<br>Care<br>Paramedic<br>Surveys | During the study period there were 40 paramedic visits. Of these, 90% received an after-hours visit and remained at their site of care; 5% attended an emergency department and 5% were directly admitted to hospice. Paramedics found palliative care rewarding and contributory towards job satisfaction, however, also demanding. Paramedics appreciated the specialist palliative care service's telephonic support. | Methodology lacking adequate description. Qualitative data without thematic analysis.                                                              |
| Taghavi, et al.<br>2011<br>Germany - HIC     | <i>"To determine paramedics' practices in regard to withholding and terminating resuscitation, as well as to examine reports of their practical experiences with advance directives and special palliative crisis cards".</i> | Prospective<br>Self-<br>Administered<br>Survey                                                     | 728<br>Paramedics                                                                                                                                                   | End-of-life decision-making is challenging for paramedics. Guidelines for these situations are desired. Advance directives should be legally reinforced. Education in palliative care a need for paramedics.                                                                                                                                                                                                             | No comparison of respondents vs. non-respondents – possibility of self-selection bias exists. Questionnaire was self-administered and unvalidated. |
| Waldrop, et al.<br>2014<br>USA - HIC         | <i>"To identify how a sample of prehospital providers learned about EOL care, their perceived confidence with and perspectives on improved preparation for such calls".</i>                                                   | Mixed<br>Methods<br>Cross-<br>Sectional<br>Survey                                                  | 178<br>Prehospital<br>Providers                                                                                                                                     | Key themes: 1) Prehospital provider education. 2) Public education. 3) Educating health care providers on scope of practice. 4) Conflict resolution skills. 5) handling emotional families. 6) Clarification of transfer protocols. Majority of paramedics received formal training on DNR orders (92%) and MOLST (72%). Majority of                                                                                     | Small sample size. Limited external validity.                                                                                                      |

|                                      |                                                                                                                                                                                                                                               |                                          |                           |                                                                                                                                                                                                                                                                                                                                                              |                                                                                                                                                           |
|--------------------------------------|-----------------------------------------------------------------------------------------------------------------------------------------------------------------------------------------------------------------------------------------------|------------------------------------------|---------------------------|--------------------------------------------------------------------------------------------------------------------------------------------------------------------------------------------------------------------------------------------------------------------------------------------------------------------------------------------------------------|-----------------------------------------------------------------------------------------------------------------------------------------------------------|
|                                      |                                                                                                                                                                                                                                               |                                          |                           | paramedics confident in ability to uphold DNR orders (87%) and resolve family conflict (87%).                                                                                                                                                                                                                                                                |                                                                                                                                                           |
| Waldrop, et al.<br>2015<br>USA - HIC | <i>"To explore prehospital providers' perceptions of (1) the frequencies of different types of end-of life calls, (2) the signs and symptoms of dying in prehospital care, and (3) medical orders for life sustaining treatment (MOLST)".</i> | Descriptive Cross-Sectional Pilot Survey | 178 Prehospital Providers | Calls to nursing homes and dying patients were frequent. MOLST documentation was infrequently encountered. There is synergy between prehospital and palliative medicine, however, further research is needed to develop prehospital end-of-life decision-making and understand how prehospital providers operate when confronted with palliative situations. | Open to participant information recall bias and perceptions. Convenience sampling at a single institution limiting external validity. Unvalidated survey. |
| Waldrop, et al.<br>2019<br>USA - HIC | <i>"To explore prehospital providers' perspectives on how the awareness of dying and documentation of preferences influence decision-making on emergency calls near the end of life".</i>                                                     | Qualitative Individual Interviews        | 43 EMS Providers          | Key themes: 1) Aware of Dying-Wishes are Documented. 2) Aware of Dying—Wishes are Undocumented. 3) Unaware of Dying-Wishes are Documented. 4) Unaware of Dying Wishes are Undocumented. 5) Discordance. EMS providers are well aware of the impact of their decisions at the end of life. EMS providers play a critical role at the end of life.             | Possibility of self-selection and recall biases. Limited external validity.                                                                               |
| Waldrop, et al.<br>2018<br>USA - HIC | <i>"To investigate prehospital providers' perceptions of emergency calls at life's end."</i>                                                                                                                                                  | Qualitative Individual Interviews        | 43 EMS Providers          | Key themes: 1) Care crises. 2) Dying-related turmoil. 3) Staffing ratios. 4) Organizational protocols. EMS providers become mediators between nursing homes and emergency                                                                                                                                                                                    | Possibility of self-selection and recall biases. Limited external validity.                                                                               |



1  
2  
3  
4  
5  
6  
7  
8  
9  
10  
11  
12  
13  
14  
15  
16  
17  
18  
19  
20  
21  
22  
23  
24  
25  
26  
27  
28  
29  
30  
31  
32  
33  
34  
35  
36  
37  
38  
39  
40  
41  
42  
43  
44  
45  
46

|                                     |                                                                                                                                                                                                                   |                                                     |                   |                                                                                                                                                                                                                                                                                                                                                                                                                                             |                                                                                                                                  |
|-------------------------------------|-------------------------------------------------------------------------------------------------------------------------------------------------------------------------------------------------------------------|-----------------------------------------------------|-------------------|---------------------------------------------------------------------------------------------------------------------------------------------------------------------------------------------------------------------------------------------------------------------------------------------------------------------------------------------------------------------------------------------------------------------------------------------|----------------------------------------------------------------------------------------------------------------------------------|
|                                     |                                                                                                                                                                                                                   |                                                     |                   | departments by handling tension, conflict and challenges in patient management.                                                                                                                                                                                                                                                                                                                                                             |                                                                                                                                  |
| Waldrop, et al. 2015<br>USA - HIC   | <i>“To explore and describe how prehospital providers assess and manage end-of-life emergency calls”.</i>                                                                                                         | Qualitative Individual Interviews                   | 43 EMS Providers  | Key themes: multifocal assessment involving family, patient and surroundings, emotional family responses, conflict between family, patient and practitioner and management of the dying process. Results suggest need for increased ability of prehospital providers to uphold advance directives and patient wishes at end of life.                                                                                                        | Possibility of self-selection and recall biases. Limited external validity.                                                      |
| Wenger, et al. 2022<br>USA - HIC    | <i>“To survey the state of Michigan’s EMS providers regarding encounters with hospice patients to better understand challenges caring for this population and to identify any need for additional education.”</i> | Self-Administered Survey                            | 706 EMS Providers | Most EMS providers (96%) had at least one encounter with a hospice patient. Only 24% had received formal education in this area. Most (86%) indicated interest in this training. Identified challenges included inaccessible advance directives (72%), pressure from family for aggressive treatment (61%), and difficulty contacting hospice personnel (48%). Empowering EMS providers with training in these areas would bridge the gaps. | Possibility of self-selection and recall biases. Questionnaire was self-administered and unvalidated. Limited external validity. |
| Wiese, et al. 2013<br>Germany - HIC | <i>“To determine international recommendations for the treatment and prevention of palliative emergencies”.</i>                                                                                                   | Mixed Methods: Prospective Self-Administered Survey | 92 Experts        | Four standards in the management of palliative emergencies were recommended: 1) Early integration of “Palliative Care Teams” and basic outpatient                                                                                                                                                                                                                                                                                           | Possibility of self-selection bias. Limited external validity. Unvalidated survey.                                               |

|                                     |                                                                                                                                                                                                                                             |                                      |                          |                                                                                                                                                                                                                                                         |                                                                                                       |
|-------------------------------------|---------------------------------------------------------------------------------------------------------------------------------------------------------------------------------------------------------------------------------------------|--------------------------------------|--------------------------|---------------------------------------------------------------------------------------------------------------------------------------------------------------------------------------------------------------------------------------------------------|-------------------------------------------------------------------------------------------------------|
|                                     |                                                                                                                                                                                                                                             |                                      |                          | palliative care systems. 2) End-of-life discussions. 3) Defined emergency medical documents, drug boxes, and "Do not attempt resuscitation" orders. 4) Emergency medical training for physicians and paramedics.                                        |                                                                                                       |
| Wiese, et al. 2012<br>Germany - HIC | <i>"To determine paramedics' understanding of their role in withholding or withdrawing resuscitation/EoL-treatment of palliative care patients when an advance directive is present"</i> .                                                  | Prospective Self-Administered Survey | 728 Paramedics           | Majority of paramedics (71%) have dealt with palliative emergencies. Improved training and guidelines for paramedics are necessary. Ethical and legal obligations may conflict for paramedics faced with palliative emergencies.                        | Possibility of self-selection and recall biases. Questionnaire was self-administered and unvalidated. |
| Wiese, et al. 2010<br>Germany - HIC | <i>"To provide information about the strategic and therapeutic approach employed by EMTs in outpatient palliative care patients in cardiac arrest"</i> .                                                                                    | Retrospective Cohort                 | 88 Patient Records       | Approaches to prehospital palliative patients with cardiac arrest differ based upon EMS provider qualification. Many resuscitations are initiated contrary to patient wishes due to lack of advance directives. These should be more readily available. | Small sample size. Limited external validity.                                                         |
| Wiese, et al. 2009<br>Germany - HIC | <i>"To show the importance of palliative medical care competence in the pre-hospital emergency medical care of patients with advanced cancer diseases [and] to describe basic approaches to improve the current situation in Germany"</i> . | Prospective Cohort                   | 361 Emergency Calls      | Prehospital palliative care improves when prehospital physicians have palliative care expertise. Prehospital palliative care education is recommended.                                                                                                  | Limited external validity.                                                                            |
| Wiese, et al. 2009<br>Germany - HIC | To interview prehospital emergency physicians (EP) <i>"about their knowledge of</i>                                                                                                                                                         | Retrospective Self-                  | 104 Emergency Physicians | Most participants (89%) had been confronted with palliative emergencies and expressed                                                                                                                                                                   | Possibility of self-selection and recall biases. Questionnaire was self-                              |

|                                     |                                                                                                                                                                                                                              |                      |                          |                                                                                                                                                                                                                                       |                                               |
|-------------------------------------|------------------------------------------------------------------------------------------------------------------------------------------------------------------------------------------------------------------------------|----------------------|--------------------------|---------------------------------------------------------------------------------------------------------------------------------------------------------------------------------------------------------------------------------------|-----------------------------------------------|
|                                     | <i>palliative care, about their experiences in dealing with palliative care patients in out-of-hospital emergency situations and about their beliefs and interests in palliative care”.</i>                                  | Administered Survey  |                          | uncertainties in managing these situations. Psychosocial and social care represented frequent challenges. Most participants (80%) were interested in further palliative care training.                                                | administered and unvalidated.                 |
| Wiese, et al. 2009<br>Germany - HIC | To investigate and compare “ <i>the emergency medical treatment of acute dyspnoea in palliative care patients affected by advanced (palliative) stages of cancer disease on basis of emergency medical therapy schemes”.</i> | Retrospective Cohort | 116 Patient Care Records | Significant relief of acute dyspnoea when using opioids compared to standard treatment. This should be included in emergency physician training. Most emergency physicians (>70%) were uncertain about palliative patient management. | Small sample size. Limited external validity. |

## Preferred Reporting Items for Systematic reviews and Meta-Analyses extension for Scoping Reviews (PRISMA-ScR) Checklist

| SECTION                                               | ITEM | PRISMA-ScR CHECKLIST ITEM                                                                                                                                                                                                                                                                                  | REPORTED ON PAGE # |
|-------------------------------------------------------|------|------------------------------------------------------------------------------------------------------------------------------------------------------------------------------------------------------------------------------------------------------------------------------------------------------------|--------------------|
| <b>TITLE</b>                                          |      |                                                                                                                                                                                                                                                                                                            |                    |
| Title                                                 | 1    | Identify the report as a scoping review.                                                                                                                                                                                                                                                                   |                    |
| <b>ABSTRACT</b>                                       |      |                                                                                                                                                                                                                                                                                                            |                    |
| Structured summary                                    | 2    | Provide a structured summary that includes (as applicable): background, objectives, eligibility criteria, sources of evidence, charting methods, results, and conclusions that relate to the review questions and objectives.                                                                              |                    |
| <b>INTRODUCTION</b>                                   |      |                                                                                                                                                                                                                                                                                                            |                    |
| Rationale                                             | 3    | Describe the rationale for the review in the context of what is already known. Explain why the review questions/objectives lend themselves to a scoping review approach.                                                                                                                                   |                    |
| Objectives                                            | 4    | Provide an explicit statement of the questions and objectives being addressed with reference to their key elements (e.g., population or participants, concepts, and context) or other relevant key elements used to conceptualize the review questions and/or objectives.                                  |                    |
| <b>METHODS</b>                                        |      |                                                                                                                                                                                                                                                                                                            |                    |
| Protocol and registration                             | 5    | Indicate whether a review protocol exists; state if and where it can be accessed (e.g., a Web address); and if available, provide registration information, including the registration number.                                                                                                             |                    |
| Eligibility criteria                                  | 6    | Specify characteristics of the sources of evidence used as eligibility criteria (e.g., years considered, language, and publication status), and provide a rationale.                                                                                                                                       |                    |
| Information sources*                                  | 7    | Describe all information sources in the search (e.g., databases with dates of coverage and contact with authors to identify additional sources), as well as the date the most recent search was executed.                                                                                                  |                    |
| Search                                                | 8    | Present the full electronic search strategy for at least 1 database, including any limits used, such that it could be repeated.                                                                                                                                                                            |                    |
| Selection of sources of evidence†                     | 9    | State the process for selecting sources of evidence (i.e., screening and eligibility) included in the scoping review.                                                                                                                                                                                      |                    |
| Data charting process‡                                | 10   | Describe the methods of charting data from the included sources of evidence (e.g., calibrated forms or forms that have been tested by the team before their use, and whether data charting was done independently or in duplicate) and any processes for obtaining and confirming data from investigators. |                    |
| Data items                                            | 11   | List and define all variables for which data were sought and any assumptions and simplifications made.                                                                                                                                                                                                     |                    |
| Critical appraisal of individual sources of evidence§ | 12   | If done, provide a rationale for conducting a critical appraisal of included sources of evidence; describe the methods used and how this information was used in any data synthesis (if appropriate).                                                                                                      |                    |
| Synthesis of results                                  | 13   | Describe the methods of handling and summarizing the data that were charted.                                                                                                                                                                                                                               |                    |



| SECTION                                       | ITEM | PRISMA-ScR CHECKLIST ITEM                                                                                                                                                                       | REPORTED ON PAGE # |
|-----------------------------------------------|------|-------------------------------------------------------------------------------------------------------------------------------------------------------------------------------------------------|--------------------|
| <b>RESULTS</b>                                |      |                                                                                                                                                                                                 |                    |
| Selection of sources of evidence              | 14   | Give numbers of sources of evidence screened, assessed for eligibility, and included in the review, with reasons for exclusions at each stage, ideally using a flow diagram.                    |                    |
| Characteristics of sources of evidence        | 15   | For each source of evidence, present characteristics for which data were charted and provide the citations.                                                                                     |                    |
| Critical appraisal within sources of evidence | 16   | If done, present data on critical appraisal of included sources of evidence (see item 12).                                                                                                      |                    |
| Results of individual sources of evidence     | 17   | For each included source of evidence, present the relevant data that were charted that relate to the review questions and objectives.                                                           |                    |
| Synthesis of results                          | 18   | Summarize and/or present the charting results as they relate to the review questions and objectives.                                                                                            |                    |
| <b>DISCUSSION</b>                             |      |                                                                                                                                                                                                 |                    |
| Summary of evidence                           | 19   | Summarize the main results (including an overview of concepts, themes, and types of evidence available), link to the review questions and objectives, and consider the relevance to key groups. |                    |
| Limitations                                   | 20   | Discuss the limitations of the scoping review process.                                                                                                                                          |                    |
| Conclusions                                   | 21   | Provide a general interpretation of the results with respect to the review questions and objectives, as well as potential implications and/or next steps.                                       |                    |
| <b>FUNDING</b>                                |      |                                                                                                                                                                                                 |                    |
| Funding                                       | 22   | Describe sources of funding for the included sources of evidence, as well as sources of funding for the scoping review. Describe the role of the funders of the scoping review.                 |                    |

JBI = Joanna Briggs Institute; PRISMA-ScR = Preferred Reporting Items for Systematic reviews and Meta-Analyses extension for Scoping Reviews.

\* Where *sources of evidence* (see second footnote) are compiled from, such as bibliographic databases, social media platforms, and Web sites.

† A more inclusive/heterogeneous term used to account for the different types of evidence or data sources (e.g., quantitative and/or qualitative research, expert opinion, and policy documents) that may be eligible in a scoping review as opposed to only studies. This is not to be confused with *information sources* (see first footnote).

‡ The frameworks by Arksey and O'Malley (6) and Levac and colleagues (7) and the JBI guidance (4, 5) refer to the process of data extraction in a scoping review as data charting.

§ The process of systematically examining research evidence to assess its validity, results, and relevance before using it to inform a decision. This term is used for items 12 and 19 instead of "risk of bias" (which is more applicable to systematic reviews of interventions) to include and acknowledge the various sources of evidence that may be used in a scoping review (e.g., quantitative and/or qualitative research, expert opinion, and policy document).

From: Tricco AC, Lillie E, Zarin W, O'Brien KK, Colquhoun H, Levac D, et al. PRISMA Extension for Scoping Reviews (PRISMA-ScR): Checklist and Explanation. *Ann Intern Med.* 2018;169:467–473. doi: [10.7326/M18-0850](https://doi.org/10.7326/M18-0850).



Supplement: bmjopen-2022-071116.draft_revisions.pdf [file bmjopen-2022-071116.draft_revisions.pdf]
