# Supplementary material for: Emergency medical services and palliative care: a scoping review
Source: PubMed Central journal article supplement — BMJ Open. 2023 Mar 15;13(3):e071116. doi: 10.1136/bmjopen-2022-071116 (PMC10030966; doi:10.1136/bmjopen-2022-071116), 2023-03-15
Supplement: bmjopen-2022-071116supp001.pdf [file bmjopen-2022-071116supp001.pdf]

### CINAHL Search String

("Palliative" OR "Palliative care" OR "Palliative medicine" OR "Palliative management" OR "Palliative nursing" OR "Palliative care nursing" OR "Palliative care nurse" OR "Palliative care nurses" OR "Palliative patient" OR "Palliative patients" OR "Palliation" OR "Palliative situation" OR "Palliative situations" OR "Palliative emergency" OR "Palliative emergencies" OR "Palliative care protocol" OR "Palliative care protocols" OR "Emergency palliative care" OR "Emergency palliation" OR "Early palliation" OR "Early palliative care" OR "Early hospice care" OR "Palliative unit" OR "Palliative units" OR "Palliative care unit" OR "Palliative care units" OR "Hospice care" OR "Hospice" OR "Hospice and palliative care nursing" OR "Hospice and palliative nursing" OR "Hospice and palliation" OR "Hospice nurse" OR "Hospice nurses" OR "Hospice physician" OR "Hospice physicians" OR "Hospice service" OR "Hospice services" OR "End of life care" OR "End of life" OR "Terminal care" OR "Terminal patient" OR "Terminal patients" OR "Terminal illness" OR "Terminal illnesses" OR "Terminally ill" OR "Dying patient" OR "Dying patients" OR "Chronic patient" OR "Chronic patients" OR "Chronic illness" OR "Chronic illnesses" OR "Chronic care" OR "Palliative home care" OR "Home based care" OR "Home care" OR "Home based palliative care" OR "Home palliative care" OR "Home palliation" OR "Palliative care team" OR "Palliative care teams" OR "Palliative care service" OR "Palliative care services" OR "Palliative service" OR "Palliative services" OR "Palliative specialist" OR "Palliative specialists" OR "Palliative physician" OR "Palliative physicians" OR "Palliative care physician" OR "Palliative care physicians" OR "Palliative doctor" OR "Palliative doctors" OR "Palliative care doctor" OR "Palliative care doctors" OR "Palliative care giver" OR "Palliative caregiver" OR "Palliative care givers" OR "Palliative caregivers" OR "Advance care plan" OR "Advance care planning" OR "Advanced disease" OR "Advanced diseases" OR "Prehospital palliative care" OR "Out of hospital palliative care") AND ("Emergency medical services" OR "EMS" OR "EMS staff" OR "EMS system" OR "Emergency medical system" OR "Emergency medical services system" OR "Emergency medical service system" OR "Emergency medical service protocol" OR "Emergency medical services protocol" OR "Emergency medical service protocols" OR "Emergency medical services protocols" OR "EMS protocol" OR "EMS protocols" OR "Emergency medical service" OR "Emergency health service" OR "Emergency health services")

OR "Emergency services" OR "Emergency care" OR "Emergency medical care" OR "Emergency healthcare" OR "Emergency treatment" OR "Emergency treatments" OR "Emergency medical treatment" OR "Emergency management" OR "Emergency medical management" OR "Out of hospital emergency care" OR "Prehospital care" OR "Prehospital emergency care" OR "Pre hospital" OR "Prehospital" OR "Out of hospital" OR "Out-of-hospital" OR "Paramedic" OR "Paramedics" OR "Emergency paramedic" OR "Emergency paramedics" OR "Ambulance" OR "Ambulances" OR "Ambulance staff" OR "Emergency medical provider" OR "Emergency medical providers" OR "Emergency medical technician" OR "Emergency medical technicians" OR "Emergency medical practitioner" OR "Emergency medical practitioners" OR "Emergency provider" OR "Emergency providers" OR "Emergency technician" OR "Emergency technicians" OR "Emergency practitioner" OR "Emergency practitioners" OR "Prehospital emergency provider" OR "Prehospital emergency providers" OR "Emergency responder" OR "Emergency responders" OR "First responder" OR "First responders" OR "Emergency doctor" OR "Emergency doctors" OR "Emergency medical doctor" OR "Emergency medical doctors" OR "Emergency physician" OR "Emergency physicians" OR "Emergency medical physician" OR "Emergency medical physicians" OR "Emergency clinician" OR "Emergency clinicians" OR "Emergency medical clinician" OR "Emergency medical clinicians" OR "Emergency medical staff" OR "Emergency medical personnel" OR "Transfer" OR "Transfers" OR "Interhospital transfer" OR "Interhospital transfers" OR "Home transfer" OR "Transfer home" OR "Emergency medical team" OR "Emergency medical teams")

#### Embase (Scopus) Search String

TITLE-ABS-KEY(("Palliative" OR "Palliative care" OR "Palliative medicine" OR "Palliative management" OR "Palliative nursing" OR "Palliative care nursing" OR "Palliative care nurse" OR "Palliative care nurses" OR "Palliative patient" OR "Palliative patients" OR "Palliation" OR "Palliative situation" OR "Palliative situations" OR "Palliative emergency" OR "Palliative emergencies" OR "Palliative care protocol" OR "Palliative care protocols" OR "Emergency palliative care" OR "Emergency palliation" OR "Early palliation" OR "Early palliative care" OR "Early hospice care" OR "Palliative unit" OR "Palliative units" OR "Palliative care unit" OR "Palliative care units" OR "Hospice care" OR "Hospice" OR "Hospice and palliative care nursing" OR

"Hospice and palliative nursing" OR "Hospice and palliation" OR "Hospice nurse" OR "Hospice nurses" OR "Hospice physician" OR "Hospice physicians" OR "Hospice service" OR "Hospice services" OR "End of life care" OR "End of life" OR "Terminal care" OR "Terminal patient" OR "Terminal patients" OR "Terminal illness" OR "Terminal illnesses" OR "Terminally ill" OR "Dying patient" OR "Dying patients" OR "Chronic patient" OR "Chronic patients" OR "Chronic illness" OR "Chronic illnesses" OR "Chronic care" OR "Palliative home care" OR "Home based care" OR "Home care" OR "Home based palliative care" OR "Home palliative care" OR "Home palliation" OR "Palliative care team" OR "Palliative care teams" OR "Palliative care service" OR "Palliative care services" OR "Palliative service" OR "Palliative services" OR "Palliative specialist" OR "Palliative specialists" OR "Palliative physician" OR "Palliative physicians" OR "Palliative care physician" OR "Palliative care physicians" OR "Palliative doctor" OR "Palliative doctors" OR "Palliative care doctor" OR "Palliative care doctors" OR "Palliative care giver" OR "Palliative caregiver" OR "Palliative care givers" OR "Palliative caregivers" OR "Advance care plan" OR "Advance care planning" OR "Advanced disease" OR "Advanced diseases" OR "Prehospital palliative care" OR "Out of hospital palliative care") AND ("Emergency medical services" OR "EMS" OR "EMS staff" OR "EMS system" OR "Emergency medical system" OR "Emergency medical services system" OR "Emergency medical service system" OR "Emergency medical service protocol" OR "Emergency medical services protocol" OR "Emergency medical service protocols" OR "Emergency medical services protocols" OR "EMS protocol" OR "EMS protocols" OR "Emergency medical service" OR "Emergency health service" OR "Emergency health services" OR "Emergency services" OR "Emergency care" OR "Emergency medical care" OR "Emergency healthcare" OR "Emergency treatment" OR "Emergency treatments" OR "Emergency medical treatment" OR "Emergency management" OR "Emergency medical management" OR "Out of hospital emergency care" OR "Prehospital care" OR "Prehospital emergency care" OR "Pre hospital" OR "Prehospital" OR "Out of hospital" OR "Out-of-hospital" OR "Paramedic" OR "Paramedics" OR "Emergency paramedic" OR "Emergency paramedics" OR "Ambulance" OR "Ambulances" OR "Ambulance staff" OR "Emergency medical provider" OR "Emergency medical providers" OR "Emergency medical technician" OR "Emergency medical technicians" OR "Emergency medical practitioner" OR "Emergency medical practitioners" OR "Emergency provider" OR "Emergency providers" OR "Emergency

technician" OR "Emergency technicians" OR "Emergency practitioner" OR "Emergency practitioners" OR "Prehospital emergency provider" OR "Prehospital emergency providers" OR "Emergency responder" OR "Emergency responders" OR "First responder" OR "First responders" OR "Emergency doctor" OR "Emergency doctors" OR "Emergency medical doctor" OR "Emergency medical doctors" OR "Emergency physician" OR "Emergency physicians" OR "Emergency medical physician" OR "Emergency medical physicians" OR "Emergency clinician" OR "Emergency clinicians" OR "Emergency medical clinician" OR "Emergency medical clinicians" OR "Emergency medical staff" OR "Emergency medical personnel" OR "Transfer" OR "Transfers" OR "Interhospital transfer" OR "Interhospital transfers" OR "Home transfer" OR "Transfer home" OR "Emergency medical team" OR "Emergency medical teams")) AND NOT INDEX(medline)

#### PsycInfo Search String

("Palliative" OR "Palliative care" OR "Palliative medicine" OR "Palliative management" OR "Palliative nursing" OR "Palliative care nursing" OR "Palliative care nurse" OR "Palliative care nurses" OR "Palliative patient" OR "Palliative patients" OR "Palliation" OR "Palliative situation" OR "Palliative situations" OR "Palliative emergency" OR "Palliative emergencies" OR "Palliative care protocol" OR "Palliative care protocols" OR "Emergency palliative care" OR "Emergency palliation" OR "Early palliation" OR "Early palliative care" OR "Early hospice care" OR "Palliative unit" OR "Palliative units" OR "Palliative care unit" OR "Palliative care units" OR "Hospice care" OR "Hospice" OR "Hospice and palliative care nursing" OR "Hospice and palliative nursing" OR "Hospice and palliation" OR "Hospice nurse" OR "Hospice nurses" OR "Hospice physician" OR "Hospice physicians" OR "Hospice service" OR "Hospice services" OR "End of life care" OR "End of life" OR "Terminal care" OR "Terminal patient" OR "Terminal patients" OR "Terminal illness" OR "Terminal illnesses" OR "Terminally ill" OR "Dying patient" OR "Dying patients" OR "Chronic patient" OR "Chronic patients" OR "Chronic illness" OR "Chronic illnesses" OR "Chronic care" OR "Palliative home care" OR "Home based care" OR "Home care" OR "Home based palliative care" OR "Home palliative care" OR "Home palliation" OR "Palliative care team" OR "Palliative care teams" OR "Palliative care service" OR

“Palliative care services” OR “Palliative service” OR “Palliative services” OR  
“Palliative specialist” OR “Palliative specialists” OR “Palliative physician” OR  
“Palliative physicians” OR “Palliative care physician” OR “Palliative care physicians”  
OR “Palliative doctor” OR “Palliative doctors” OR “Palliative care doctor” OR  
“Palliative care doctors” OR “Palliative care giver” OR “Palliative caregiver” OR  
“Palliative care givers” OR “Palliative caregivers” OR “Advance care plan” OR  
“Advance care planning” OR “Advanced disease” OR “Advanced diseases” OR  
“Prehospital palliative care” OR “Out of hospital palliative care”) AND (“Emergency  
medical services” OR “EMS” OR “EMS staff” OR “EMS system” OR “Emergency  
medical system” OR “Emergency medical services system” OR “Emergency medical  
service system” OR “Emergency medical service protocol” OR “Emergency medical  
services protocol” OR “Emergency medical service protocols” OR “Emergency  
medical services protocols” OR “EMS protocol” OR “EMS protocols” OR “Emergency  
medical service” OR “Emergency health service” OR “Emergency health services”  
OR “Emergency services” OR “Emergency care” OR “Emergency medical care” OR  
“Emergency healthcare” OR “Emergency treatment” OR “Emergency treatments” OR  
“Emergency medical treatment” OR “Emergency management” OR “Emergency  
medical management” OR “Out of hospital emergency care” OR “Prehospital care”  
OR “Prehospital emergency care” OR “Pre hospital” OR “Prehospital” OR “Out of  
hospital” OR “Out-of-hospital” OR “Paramedic” OR “Paramedics” OR “Emergency  
paramedic” OR “Emergency paramedics” OR “Ambulance” OR “Ambulances” OR  
“Ambulance staff” OR “Emergency medical provider” OR “Emergency medical  
providers” OR “Emergency medical technician” OR “Emergency medical technicians”  
OR “Emergency medical practitioner” OR “Emergency medical practitioners” OR  
“Emergency provider” OR “Emergency providers” OR “Emergency technician” OR  
“Emergency technicians” OR “Emergency practitioner” OR “Emergency practitioners”  
OR “Prehospital emergency provider” OR “Prehospital emergency providers” OR  
“Emergency responder” OR “Emergency responders” OR “First responder” OR “First  
responders” OR “Emergency doctor” OR “Emergency doctors” OR “Emergency  
medical doctor” OR “Emergency medical doctors” OR “Emergency physician” OR  
“Emergency physicians” OR “Emergency medical physician” OR “Emergency  
medical physicians” OR “Emergency clinician” OR “Emergency clinicians” OR  
“Emergency medical clinician” OR “Emergency medical clinicians” OR “Emergency  
medical staff” OR “Emergency medical personnel” OR “Transfer” OR “Transfers” OR

“Interhospital transfer” OR “Interhospital transfers” OR “Home transfer” OR “Transfer home” OR “Emergency medical team” OR “Emergency medical teams”)

#### MEDLINE (PubMed) Search String

(“Palliative”[tw] OR “Palliative care”[tw] OR “Palliative medicine”[tw] OR “Palliative management”[tw] OR “Palliative nursing”[tw] OR “Palliative care nursing”[tw] OR “Palliative care nurse”[tw] OR “Palliative care nurses”[tw] OR “Palliative patient”[tw] OR “Palliative patients”[tw] OR “Palliation”[tw] OR “Palliative situation”[tw] OR “Palliative situations”[tw] OR “Palliative emergency”[tw] OR “Palliative emergencies”[tw] OR “Palliative care protocol”[tw] OR “Palliative care protocols”[tw] OR “Emergency palliative care”[tw] OR “Emergency palliation”[tw] OR “Early palliation”[tw] OR “Early palliative care”[tw] OR “Early hospice care”[tw] OR “Palliative unit”[tw] OR “Palliative units”[tw] OR “Palliative care unit”[tw] OR “Palliative care units”[tw] OR “Hospice care”[tw] OR “Hospice”[tw] OR “Hospice and palliative care nursing”[tw] OR “Hospice and palliative nursing”[tw] OR “Hospice and palliation”[tw] OR “Hospice nurse”[tw] OR “Hospice nurses”[tw] OR “Hospice physician”[tw] OR “Hospice physicians”[tw] OR “Hospice service”[tw] OR “Hospice services”[tw] OR “End of life care”[tw] OR “End of life”[tw] OR “Terminal care”[tw] OR “Terminal patient”[tw] OR “Terminal patients”[tw] OR “Terminal illness”[tw] OR “Terminal illnesses”[tw] OR “Terminally ill”[tw] OR “Dying patient”[tw] OR “Dying patients”[tw] OR “Chronic patient”[tw] OR “Chronic patients”[tw] OR “Chronic illness”[tw] OR “Chronic illnesses”[tw] OR “Chronic care”[tw] OR “Palliative home care”[tw] OR “Home based care”[tw] OR “Home care”[tw] OR “Home based palliative care”[tw] OR “Home palliative care”[tw] OR “Home palliation”[tw] OR “Palliative care team”[tw] OR “Palliative care teams”[tw] OR “Palliative care service”[tw] OR “Palliative care services”[tw] OR “Palliative service”[tw] OR “Palliative services”[tw] OR “Palliative specialist”[tw] OR “Palliative specialists”[tw] OR “Palliative physician”[tw] OR “Palliative physicians”[tw] OR “Palliative care physician”[tw] OR “Palliative care physicians”[tw] OR “Palliative doctor”[tw] OR “Palliative doctors”[tw] OR “Palliative care doctor”[tw] OR “Palliative care doctors”[tw] OR “Palliative care giver”[tw] OR “Palliative caregiver”[tw] OR “Palliative care givers”[tw] OR “Palliative caregivers”[tw] OR “Advance care plan”[tw] OR “Advance care planning”[tw] OR

“Advanced disease”[tw] OR “Advanced diseases”[tw] OR “Prehospital palliative care”[tw] OR “Out of hospital palliative care”[tw] OR “Palliative care”[mh] OR “Hospice and palliative care nursing”[mh] OR “Palliative medicine”[mh]) AND (“Emergency medical services”[tw] OR “EMS”[tw] OR “EMS staff”[tw] OR “EMS system”[tw] OR “Emergency medical system”[tw] OR “Emergency medical services system”[tw] OR “Emergency medical service system”[tw] OR “Emergency medical service protocol”[tw] OR “Emergency medical services protocol”[tw] OR “Emergency medical service protocols”[tw] OR “Emergency medical services protocols”[tw] OR “EMS protocol”[tw] OR “EMS protocols”[tw] OR “Emergency medical service”[tw] OR “Emergency health service”[tw] OR “Emergency health services”[tw] OR “Emergency services”[tw] OR “Emergency care”[tw] OR “Emergency medical care”[tw] OR “Emergency healthcare”[tw] OR “Emergency treatment”[tw] OR “Emergency treatments”[tw] OR “Emergency medical treatment”[tw] OR “Emergency management”[tw] OR “Emergency medical management”[tw] OR “Out of hospital emergency care”[tw] OR “Prehospital care”[tw] OR “Prehospital emergency care”[tw] OR “Pre hospital”[tw] OR “Prehospital”[tw] OR “Out of hospital”[tw] OR “Out-of-hospital”[tw] OR “Paramedic”[tw] OR “Paramedics”[tw] OR “Emergency paramedic”[tw] OR “Emergency paramedics”[tw] OR “Ambulance”[tw] OR “Ambulances”[tw] OR “Ambulance staff”[tw] OR “Emergency medical provider”[tw] OR “Emergency medical providers”[tw] OR “Emergency medical technician”[tw] OR “Emergency medical technicians”[tw] OR “Emergency medical practitioner”[tw] OR “Emergency medical practitioners”[tw] OR “Emergency provider”[tw] OR “Emergency providers”[tw] OR “Emergency technician”[tw] OR “Emergency technicians”[tw] OR “Emergency practitioner”[tw] OR “Emergency practitioners”[tw] OR “Prehospital emergency provider”[tw] OR “Prehospital emergency providers”[tw] OR “Emergency responder”[tw] OR “Emergency responders”[tw] OR “First responder”[tw] OR “First responders”[tw] OR “Emergency doctor”[tw] OR “Emergency doctors”[tw] OR “Emergency medical doctor”[tw] OR “Emergency medical doctors”[tw] OR “Emergency physician”[tw] OR “Emergency physicians”[tw] OR “Emergency medical physician”[tw] OR “Emergency medical physicians”[tw] OR “Emergency clinician”[tw] OR “Emergency clinicians”[tw] OR “Emergency medical clinician”[tw] OR “Emergency medical clinicians”[tw] OR “Emergency medical staff”[tw] OR “Emergency medical personnel”[tw] OR “Transfer”[tw] OR “Transfers”[tw] OR “Interhospital transfer”[tw] OR “Interhospital transfers”[tw] OR “Home transfer”[tw]

OR "Transfer home"[tw] OR "Emergency medical team"[tw] OR "Emergency medical teams"[tw] OR "Emergency medical technicians"[mh] OR "Ambulances"[mh] OR "Emergency medical services"[mh])

### Web of Science Search String

(TS=((("Palliative" OR "Palliative care" OR "Palliative medicine" OR "Palliative management" OR "Palliative nursing" OR "Palliative care nursing" OR "Palliative care nurse" OR "Palliative care nurses" OR "Palliative patient" OR "Palliative patients" OR "Palliation" OR "Palliative situation" OR "Palliative situations" OR "Palliative emergency" OR "Palliative emergencies" OR "Palliative care protocol" OR "Palliative care protocols" OR "Emergency palliative care" OR "Emergency palliation" OR "Early palliation" OR "Early palliative care" OR "Early hospice care" OR "Palliative unit" OR "Palliative units" OR "Palliative care unit" OR "Palliative care units" OR "Hospice care" OR "Hospice" OR "Hospice and palliative care nursing" OR "Hospice and palliative nursing" OR "Hospice and palliation" OR "Hospice nurse" OR "Hospice nurses" OR "Hospice physician" OR "Hospice physicians" OR "Hospice service" OR "Hospice services" OR "End of life care" OR "End of life" OR "Terminal care" OR "Terminal patient" OR "Terminal patients" OR "Terminal illness" OR "Terminal illnesses" OR "Terminally ill" OR "Dying patient" OR "Dying patients" OR "Chronic patient" OR "Chronic patients" OR "Chronic illness" OR "Chronic illnesses" OR "Chronic care" OR "Palliative home care" OR "Home based care" OR "Home care" OR "Home based palliative care" OR "Home palliative care" OR "Home palliation" OR "Palliative care team" OR "Palliative care teams" OR "Palliative care service" OR "Palliative care services" OR "Palliative service" OR "Palliative services" OR "Palliative specialist" OR "Palliative specialists" OR "Palliative physician" OR "Palliative physicians" OR "Palliative care physician" OR "Palliative care physicians" OR "Palliative doctor" OR "Palliative doctors" OR "Palliative care doctor" OR "Palliative care doctors" OR "Palliative care giver" OR "Palliative caregiver" OR "Palliative care givers" OR "Palliative caregivers" OR "Advance care plan" OR "Advance care planning" OR "Advanced disease" OR "Advanced diseases" OR "Prehospital palliative care" OR "Out of hospital palliative care" ) ) AND TS=((("Emergency medical services" OR "EMS" OR "EMS staff" OR "EMS system"



OR "Emergency medical system" OR "Emergency medical services system" OR  
"Emergency medical service system" OR "Emergency medical service protocol" OR  
"Emergency medical services protocol" OR "Emergency medical service protocols"  
OR "Emergency medical services protocols" OR "EMS protocol" OR "EMS protocols"  
OR "Emergency medical service" OR "Emergency health service" OR "Emergency  
health services" OR "Emergency services" OR "Emergency care" OR "Emergency  
medical care" OR "Emergency healthcare" OR "Emergency treatment" OR  
"Emergency treatments" OR "Emergency medical treatment" OR "Emergency  
management" OR "Emergency medical management" OR "Out of hospital  
emergency care" OR "Prehospital care" OR "Prehospital emergency care" OR "Pre  
hospital" OR "Prehospital" OR "Out of hospital" OR "Out-of-hospital" OR "Paramedic"  
OR "Paramedics" OR "Emergency paramedic" OR "Emergency paramedics" OR  
"Ambulance" OR "Ambulances" OR "Ambulance staff" OR "Emergency medical  
provider" OR "Emergency medical providers" OR "Emergency medical technician"  
OR "Emergency medical technicians" OR "Emergency medical practitioner" OR  
"Emergency medical practitioners" OR "Emergency provider" OR "Emergency  
providers" OR "Emergency technician" OR "Emergency technicians" OR "Emergency  
practitioner" OR "Emergency practitioners" OR "Prehospital emergency provider" OR  
"Prehospital emergency providers" OR "Emergency responder" OR "Emergency  
responders" OR "First responder" OR "First responders" OR "Emergency doctor" OR  
"Emergency doctors" OR "Emergency medical doctor" OR "Emergency medical  
doctors" OR "Emergency physician" OR "Emergency physicians" OR "Emergency  
medical physician" OR "Emergency medical physicians" OR "Emergency clinician"  
OR "Emergency clinicians" OR "Emergency medical clinician" OR "Emergency  
medical clinicians" OR "Emergency medical staff" OR "Emergency medical  
personnel" OR "Transfer" OR "Transfers" OR "Interhospital transfer" OR  
"Interhospital transfers" OR "Home transfer" OR "Transfer home" OR "Emergency  
medical team" OR "Emergency medical teams"))
